# Supplementary material for: The peroxisomal exportomer directly inhibits phosphoactivation of the pexophagy receptor Atg36 to suppress pexophagy in yeast
Source: eLife journal article supplement (doi:10.7554/elife.74531), 2022-03-09
Supplement: data1 [file source data Figure 3-figure supplement 1.pdf › source data/source data Figure 3-figure supplement 1.pdf]

Figure 3-FS1A

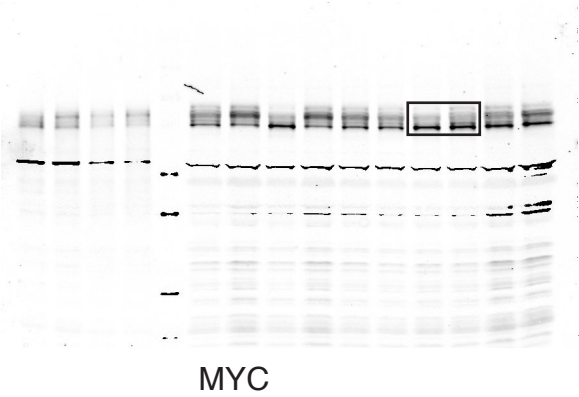

MYC

Figure 3-FS1B

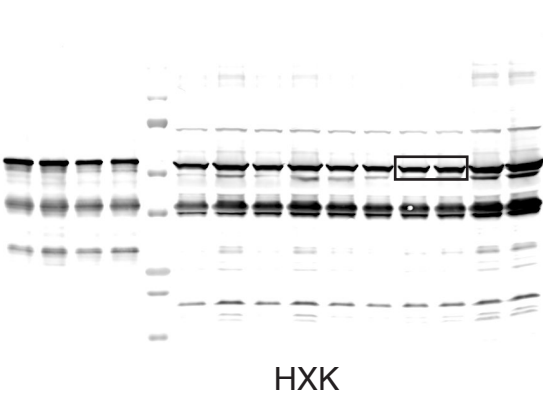

HXK

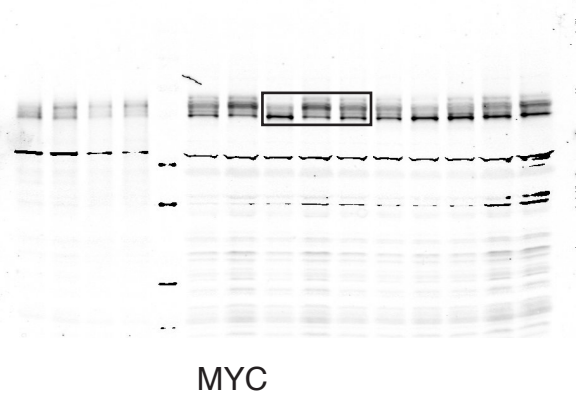

MYC

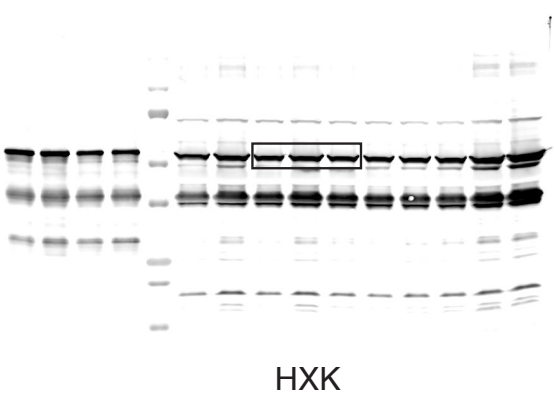

HXK

Figure 3-FS1C

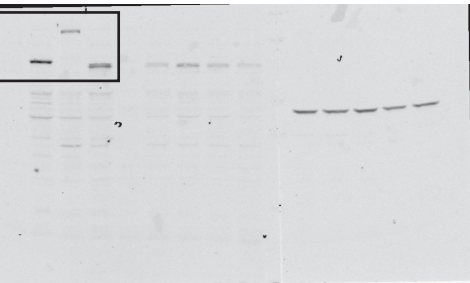

mCherry

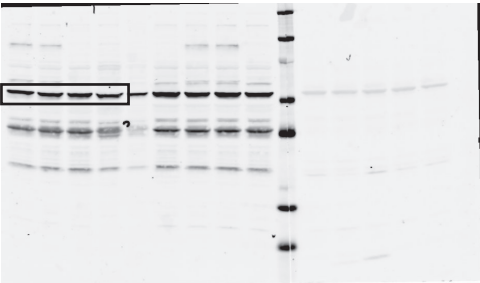

HXK

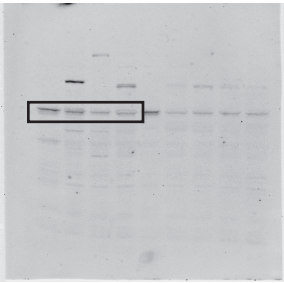

GFP

Figure 3-FS1E

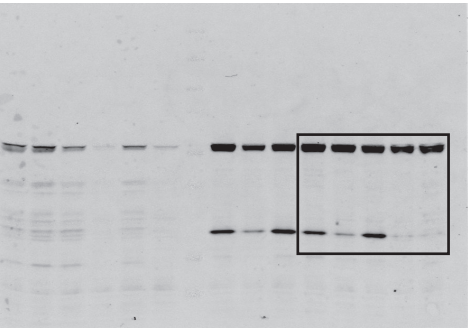

GFP

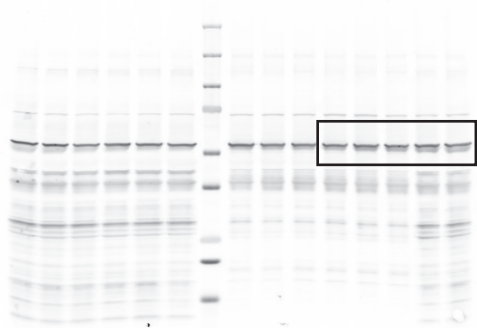

HXK

Figure 3-FS1F

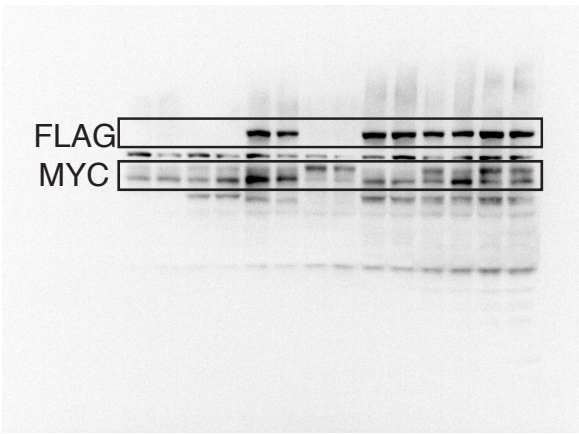

FLAG  
MYC

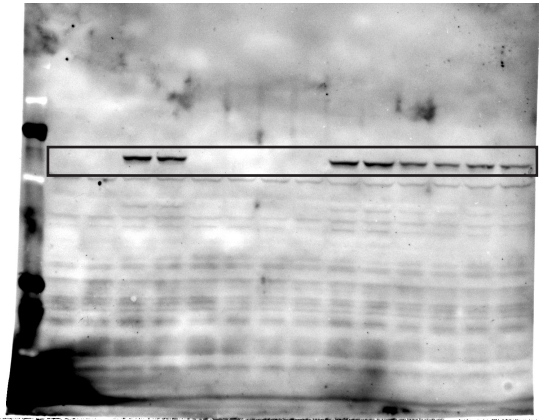

HA

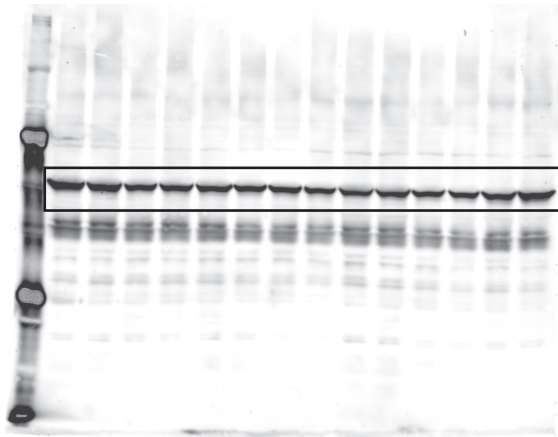

HXK

Figure 3-FS1G

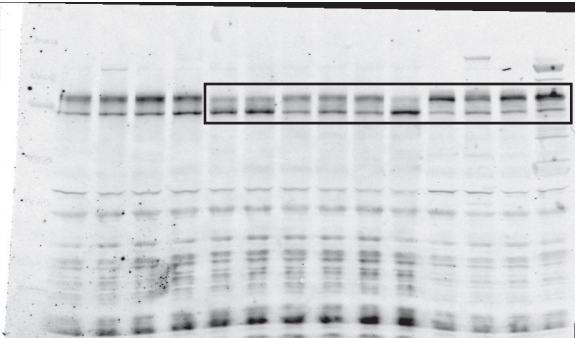

MYC

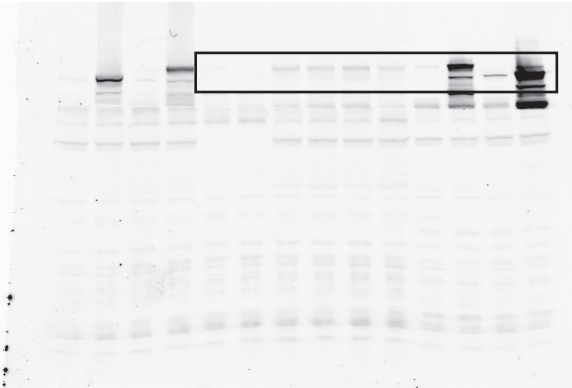

FLAG

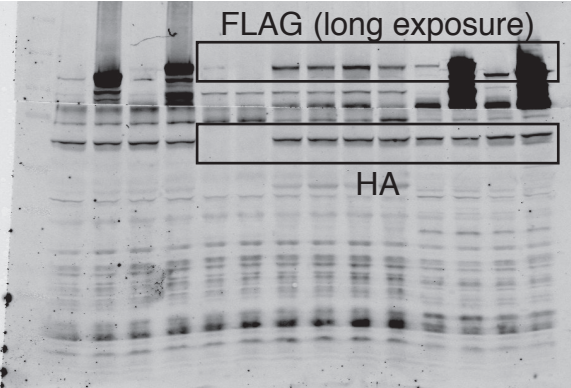

FLAG (long exposure)  
HA

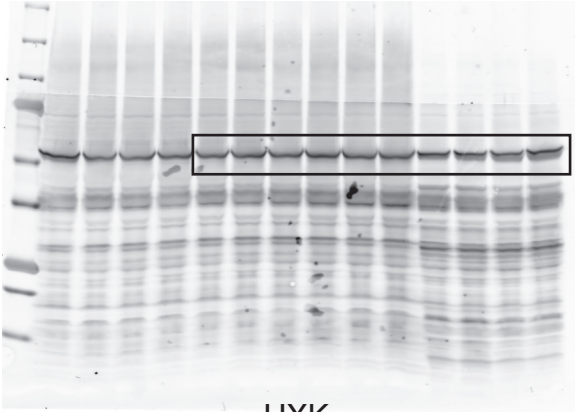

HXK
