# Supplementary material for: The peroxisomal exportomer directly inhibits phosphoactivation of the pexophagy receptor Atg36 to suppress pexophagy in yeast
Source: eLife journal article supplement (doi:10.7554/elife.74531), 2022-03-09
Supplement: data1 [file source data_Fig 3D MS data.xlsx]

## Sheet: Fig 3D MS data
		Summed Signal to Noise									Normalized % Relative Abundance
Protein ID (Uniprot)	# of quantified peptides	VDY3676-1	VDY3676-2	VDY3676-3	VDY3677-1	VDY3677-2	VDY3677-3	VDY3678-1	VDY3678-2	VDY3678-3	VDY3676-1	VDY3676-2	VDY3676-3	VDY3677-1	VDY3677-2	VDY3677-3	VDY3678-1	VDY3678-2	VDY3678-3
sp|P38111|ATR_YEAST	119	7311.48	7717.42	13490.7	11080.4	11832.5	14486	10847.5	12217.9	17148.1	13.2492	9.49139	12.8481	10.592	7.3602	9.12042	11.9478	11.5636	13.8273
sp|P32319|VPS10_YEAST	48	3096.36	3599.88	5308.98	4158.09	5308.25	5795.65	2177.32	2956.95	3605.43	16.4428	12.9743	14.8168	11.6482	9.67617	10.6932	7.02782	8.20122	8.51955
sp|P22336|RFA1_YEAST	44	3035.2	3332.62	5725.98	4323.52	4581.52	6609.96	3838.33	4566.83	6550.24	13.7406	10.2395	13.6235	10.3251	7.11962	10.3968	10.5618	10.798	13.1951
sp|Q04377|LCD1_YEAST	41	2845.08	3011.27	5104.77	3907.32	4240.89	6090.59	4283.81	4914.83	6534.08	13.3679	9.60264	12.6056	9.68471	6.83995	9.94281	12.2341	12.0611	13.6612
sp|P38631|FKS1_YEAST	34	1967.87	2153.27	3267.31	2333.62	2855.66	2879.47	1013.59	1490.82	1789.39	18.6544	13.8534	16.2777	11.6696	9.29221	9.48372	5.84011	7.38108	7.54788
sp|Q07878|VPS13_YEAST	30	400.205	528.249	667.238	1320.91	1725.66	2375.43	1269.74	1575.89	2431.11	6.78255	6.07606	5.94306	11.8093	10.0391	13.9873	13.0798	13.9491	18.3337
sp|P18759|SEC18_YEAST	22	1169.79	1361.84	1941.53	1316.08	1595.32	1809.26	967.473	1183.63	1422.04	17.1424	13.5445	14.953	10.1739	8.02491	9.21186	8.61743	9.05922	9.27282
sp|Q08215|PEX15_YEAST	21	11.3178	22.3368	56.1436	2229.3	2464.47	3179.96	1875.65	2545.83	3037.05	0.161592	0.216447	0.421286	16.7906	12.0784	15.7747	16.2774	18.9845	19.2951
sp|P33302|PDR5_YEAST	21	1459.98	1653.47	2271.18	1726.73	2218.09	2463.95	966.987	1181.93	1315.98	18.036	13.8632	14.7456	11.2527	9.40591	10.5757	7.26087	7.62599	7.234
sp|P30624|LCF1_YEAST	20	174.359	230.141	362.491	1372.86	1590.13	2388.11	1442.6	1980.18	2941.82	2.98512	2.67414	3.26162	12.3989	9.34497	14.2054	15.012	17.7065	22.4114
sp|P37296|STV1_YEAST	20	1372.65	1407.04	2071.64	1468.41	1733.75	1955.12	953.177	1168.84	1406.85	18.8518	13.1152	14.953	10.6385	8.17352	9.32931	7.95688	8.38417	8.59762
sp|P15108|HSC82_YEAST	19	160.039	501.578	342.634	1360.56	1685.37	1333.88	1229.12	1237.51	1196.17	3.66565	7.79716	4.12453	16.4393	13.251	10.6151	17.1117	14.8042	12.1914
sp|P32563|VPH1_YEAST	19	1306.92	1403.47	2068.89	1164.01	1464.6	1318.39	523.28	655.518	787.218	22.0305	16.0565	18.3287	10.3507	8.47465	7.72148	5.36147	5.77125	5.90481
sp|P35197|GCS1_YEAST	18	85.2098	131.661	177.226	1136.63	1255.81	2089.16	1677.29	2242.67	3260.86	1.50386	1.57706	1.64386	10.5823	7.60802	12.8107	17.9929	20.6726	25.6087
sp|Q01896|ATN2_YEAST	18	1010.9	1103.85	1574.49	938.677	1184.69	1227.92	658.062	732.383	850.12	19.9121	14.7568	16.2993	9.75362	8.01019	8.40353	7.87864	7.53458	7.4512
sp|P32324|EF2_YEAST	17	445.212	718.904	780.402	1780.43	2471.29	2722.05	2159.55	1870.6	2449.68	5.97103	6.54374	5.50072	12.5964	11.3772	12.6841	17.6044	13.1031	14.6193
sp|P00560|PGK_YEAST	16	809.337	1085.53	1355.98	931.92	1166.62	1512.2	1611.98	1724.79	1986.52	12.5658	11.4387	11.0646	7.63274	6.21756	8.15743	15.2124	13.9865	13.7243
sp|P40069|IMB4_YEAST	15	68.7302	180.242	218.211	1577.14	2018.5	1308.6	1123.59	1399.86	1238.36	1.61704	2.87808	2.69817	19.5742	16.3016	10.697	16.0678	17.2016	12.9645
sp|P00549|KPYK1_YEAST	15	596.929	950.239	1023.14	1438.81	1924.35	1861.57	1677.25	1370.05	1464.29	9.57765	10.3477	8.62761	12.1781	10.5986	10.3776	16.3572	11.4811	10.4544
sp|P17255|VATA_YEAST	15	678.089	739.459	1165.28	775.288	1027.64	1210.23	680.182	775.644	1021.03	15.9646	11.8157	14.4185	9.62883	8.305	9.89966	9.73353	9.5377	10.6966
sp|P28795|PEX3_YEAST	14	5.09266	13.3049	33.3293	1620.32	1852.7	1933.85	1539.86	1994.02	2284.13	0.0981613	0.174053	0.33763	16.4754	12.2583	12.9509	18.0406	20.0741	19.5908
sp|P05750|RS3_YEAST	14	115.953	187.325	260.934	1215.86	1763.32	2145.81	1417.75	1816.85	2194.81	2.24726	2.464	2.6578	12.4307	11.7309	14.4493	16.7012	18.3909	18.928
sp|P38820|UBA4_YEAST	14	717.365	712.459	1480.93	1373.07	1462.73	2514.78	944.094	1174.56	1645.63	11.9582	8.06043	12.9741	12.0742	8.36985	14.5649	9.56566	10.2261	12.2066
sp|P32787|MG101_YEAST	14	880.257	1005.24	1771.86	1276.44	1410.44	2086.79	1252.09	1480.51	1809.34	13.1075	10.1591	13.8662	10.0265	7.20931	10.7962	11.3324	11.5142	11.9886
sp|P33442|RS3A1_YEAST	13	158.623	326.053	402.832	1859.15	2144	2107.93	1346.12	1580.73	1585.72	2.94285	4.10548	3.92776	18.1952	13.6539	13.5875	15.1796	15.3169	13.0908
sp|P40527|ATC7_YEAST	13	380.848	410.964	610.575	498.852	693.326	706.134	297.101	422.561	522.195	16.1322	11.8146	13.5925	11.1469	10.0811	10.3923	7.64929	9.34851	9.84262
sp|P26754|RFA2_YEAST	13	516.63	630.889	1194.4	920.283	870.146	1264.64	872.558	1002.93	1308.15	11.6559	9.66033	14.1623	10.9528	6.73886	9.91322	11.9656	11.8181	13.1329
sp|Q06523|YP148_YEAST	12	67.4094	96.2041	147.948	1027.7	1324.51	1826.54	1326.5	1675.47	2415.34	1.46606	1.42004	1.69107	11.7907	9.88818	13.8021	17.5354	19.0318	23.3747
sp|P02994|EF1A_YEAST	12	402.428	840.036	689.657	900.309	1215.28	1288.94	1022.59	866.732	943.171	9.6532	13.6758	8.69431	11.3924	10.0066	10.7423	14.9094	10.8587	10.0672
sp|P07267|CARP_YEAST	12	683.973	713.743	1080.74	743.349	824.833	856.312	405.343	522.514	598.199	19.5721	13.8616	16.2532	11.221	8.10203	8.51361	7.05013	7.80923	7.61695
sp|P40562|MPH1_YEAST	12	429.822	526.495	910.19	522.734	647.317	1073.07	614.455	654.385	996.232	13.0453	10.8451	14.5183	8.36924	6.74389	11.3155	11.3352	10.3731	13.4543
sp|P32660|ATC5_YEAST	11	265.682	280.712	453.257	572.016	830.233	895.504	324.888	383.455	516.817	11.9676	8.58184	10.7302	13.5923	12.8373	14.0151	8.89518	9.02135	10.359
sp|P40988|FET4_YEAST	11	1024.72	965.075	1550.13	1212.13	1497.42	1422.65	533.077	668.146	760.285	19.8843	12.7099	15.8086	12.4078	9.9742	9.59149	6.2874	6.77155	6.56476
sp|P40531|GVP36_YEAST	11	13.7049	36.1442	46.1318	654.995	743.079	1018.34	1082.69	1352.97	1765.52	0.43271	0.77452	0.765491	10.9094	8.05349	11.1711	20.7778	22.3111	24.8045
sp|P10591|HSP71_YEAST	11	261.006	488.448	437.534	634.781	827.942	873.91	880.732	730.762	929.596	8.48579	10.7779	7.47606	10.8869	9.23996	9.87167	17.4045	12.4088	13.4485
sp|P69771|DID2_YEAST	11	946.401	952.938	1654.63	954.234	998.982	1103.34	580.523	748.795	805.08	19.739	13.4892	18.1372	10.4989	7.15214	7.99542	7.35943	8.15687	7.4718
sp|P32602|SEC17_YEAST	11	458.189	514.096	866.148	587.997	776.319	838.186	405.336	542.546	671.966	15.4849	11.7918	15.3842	10.4828	9.00601	9.84206	8.32633	9.5766	10.1053
sp|P06169|PDC1_YEAST	11	206.108	380.376	392.009	454.565	607.256	752.564	787.442	480.639	580.113	8.70464	10.9029	8.70103	10.1273	8.80352	11.0429	20.2139	10.602	10.902
sp|P00924|ENO1_YEAST	11	746.623	1035.49	1263.41	1055.82	1362.14	1812.43	1299.19	1104.34	1398.31	12.9705	12.2088	11.535	9.67575	8.12279	10.9395	13.7184	10.02	10.8092
sp|P09798|CDC16_YEAST	11	370.416	442.111	750.438	692.987	870.471	1194.91	985.615	1153.68	1818.23	8.91474	7.22143	9.49188	8.798	7.1912	9.99162	14.4179	14.5016	19.4717
sp|P05030|PMA1_YEAST	10	160.255	180.852	290.088	907.299	1278.36	1154.24	674.302	796.301	641.73	5.5931	4.28388	5.32095	16.7044	15.3152	13.9965	14.3044	14.5154	9.96619
sp|Q03694|INP1_YEAST	10	37.5547	82.4788	115.964	1162.1	1310.79	1940.96	996.593	1228.81	1741.73	0.959399	1.43005	1.55696	15.661	11.4947	17.228	15.4749	16.3957	19.7994
sp|P00330|ADH1_YEAST	10	354.387	534.322	660.963	778.865	1015.58	1055.66	972.732	780.465	853.482	9.92871	10.16	9.73221	11.5111	9.76692	10.2759	16.5647	11.4204	10.6401
sp|P31377|STX8_YEAST	10	479.199	469.818	790.109	593.427	665.5	774.077	363.368	455.61	555.692	17.5541	11.6806	15.2114	11.4676	8.36836	9.85213	8.09069	8.71702	9.05804
sp|P36017|VPS21_YEAST	10	744.133	791.559	1564.03	1038.18	1186.7	1194.48	731.076	979.93	1077.9	15.158	10.9433	16.7438	11.1559	8.29775	8.45381	9.05167	10.4255	9.77025
sp|P16140|VATB_YEAST	10	310.37	268.255	492.047	433.618	648.15	524.255	375.748	402.525	568.442	14.9506	8.77	12.4567	11.0186	10.7172	8.77411	11.0015	10.127	12.1843
sp|P12866|STE6_YEAST	10	488.84	498.745	825.84	460.662	589.422	661.814	240.726	285.707	320.173	20.5858	14.2545	18.2775	10.2335	8.52032	9.6832	6.16168	6.28395	5.99959
sp|P17967|PDI_YEAST	10	448.378	521.214	635.596	520.432	579.782	574.217	492.557	583.266	652.817	16.5837	13.0835	12.3548	10.1541	7.36087	7.37894	11.0731	11.2671	10.7439
sp|P40890|VTH2_YEAST	10	579.785	623.933	838.934	614.821	782.036	841.992	483.874	555.576	760.126	17.8286	13.0215	13.5581	9.97332	8.2548	8.99583	9.04396	8.92289	10.4009
sp|P38149|DUG2_YEAST	10	284.847	321.572	522.489	431.126	456.41	591.813	507.359	573.088	784.37	12.256	9.39052	11.815	9.78549	6.74096	8.84718	13.2687	12.8787	15.0174
sp|Q99231|YD12B_YEAST	10	533.446	611.41	948.777	556.759	665.381	887.874	557.223	663.593	793.101	16.0879	12.5145	15.0381	8.85761	6.88824	9.30342	10.2144	10.4525	10.6432
sp|P40495|LYS12_YEAST	9	65.3483	116.304	153.479	1265.5	1729.36	1020.18	784.215	1016.08	782.923	2.04448	2.46954	2.52357	20.8857	18.5721	11.0894	14.9128	16.603	10.8994
sp|P47912|LCF4_YEAST	9	79.2918	92.8734	145.229	533.2	685.173	719.501	461.257	596.889	704.393	4.19389	3.3339	4.03702	14.8771	12.4399	13.2221	14.8288	16.4889	16.5783
sp|P47018|MTC1_YEAST	9	29.2181	55.2116	91.0603	707.926	760.23	1009.24	697.694	984.26	1543.69	1.07236	1.37529	1.75646	13.7062	9.57773	12.8696	15.5643	18.8673	25.2107
sp|P07560|SEC4_YEAST	9	378.334	475.392	782.718	768.046	909.046	1043.58	709.603	848.161	1055.74	10.6989	9.12406	11.6329	11.4575	8.82424	10.2535	12.197	12.5271	13.2848
sp|P11484|HSP75_YEAST	9	247.108	518.218	471.425	606.486	755.035	906.651	803.226	651.537	801.923	8.44513	12.02	8.46742	10.934	8.85758	10.7657	16.6852	11.6297	12.1952
sp|P39929|SNF7_YEAST	9	545.741	613.02	892.061	577.813	566.85	657.404	324.717	430.63	481.248	19.5267	14.8864	16.7747	10.9061	6.96208	8.17253	7.06191	8.04743	7.66209
sp|P40051|ICP55_YEAST	9	374.492	432.238	528.643	510.35	574.909	622.286	542.851	533.178	735.012	14.6061	11.4416	10.8361	10.5002	7.69695	8.43264	12.8691	10.8611	12.7562
sp|P25491|MAS5_YEAST	8	176.228	288.57	326.466	1193.31	1358.08	1375.1	1071.65	1190.87	1309.57	4.43545	4.92932	4.31836	15.8437	11.7332	12.0248	16.3942	15.6544	14.6665
sp|Q03940|RUVB1_YEAST	8	66.9689	93.5903	132.27	727.306	850.355	757.691	733.549	888.349	907.198	2.73081	2.59014	2.83465	15.645	11.9027	10.7348	18.1812	18.9197	16.461
sp|P09620|KEX1_YEAST	8	312.321	298.849	511.549	473.323	582.778	746.888	281.073	384.547	499.333	14.9643	9.71808	12.8813	11.9634	9.58488	12.4335	8.18558	9.62311	10.6459
sp|P25297|PHO84_YEAST	8	594.546	619.293	990.545	610.117	711.813	762.311	211.893	282.028	237.757	21.6326	15.293	18.9416	11.7105	8.89032	9.63691	4.68613	5.35953	3.8494
sp|P27809|KRE2_YEAST	8	659.713	753.188	958.162	726.384	1094.83	998.63	338.1	492.622	596.37	18.8028	14.5695	14.3524	10.9213	10.7113	9.88903	5.85716	7.33317	7.56343
sp|D6VTK4|STE2_YEAST	8	538.922	541.036	879.343	517.021	698.549	657.799	261.069	340.699	405.34	20.52	13.9814	17.5966	10.3848	9.13011	8.70214	6.042	6.77536	6.86762
sp|P40897|OPT1_YEAST	8	615.383	768.864	1105.88	668.811	909.967	897.413	371.67	516.515	539.62	17.9351	15.2083	16.9389	10.2825	9.10356	9.08724	6.584	7.86233	6.99812
sp|P53388|DIP5_YEAST	8	597.092	532.101	884.115	507.436	697.764	526.846	254.779	315.505	395.437	22.8882	13.8433	17.8114	10.2611	9.18138	7.01676	5.93621	6.31667	6.74504
sp|P29465|CHS3_YEAST	8	439.386	493.689	686.301	445.094	583.744	675.031	288.403	378.178	524.248	18.2247	13.8976	14.9605	9.7388	8.31121	9.72791	7.2709	8.19258	9.67579
sp|P32445|RIM1_YEAST	8	146.031	154.618	568.666	455.835	323.717	1096.9	657.034	1048.61	1687.5	4.89961	3.52087	10.0275	8.06798	3.7283	12.7869	13.3992	18.3756	25.194
sp|P53108|YIP5_YEAST	7	137.034	166.543	297.955	405.23	511.868	604.849	238.418	333.805	450.648	8.97956	7.40673	10.2612	14.0077	11.5137	13.7707	9.496	11.4243	13.1401
sp|Q01852|TIM44_YEAST	7	41.9102	88.6314	96.2812	479.435	619.655	669.996	637.066	791.692	1036.83	1.98331	2.84663	2.39459	11.9685	10.0658	11.016	18.3244	19.5676	21.8331
sp|P0CH08|RL401_YEAST	7	448.376	546.287	830.372	595.662	730.638	832.695	420.38	480	542.643	15.6909	12.9747	15.272	10.9962	8.77678	10.1245	8.94173	8.77318	8.44997
sp|P46982|MNN5_YEAST	7	252.822	313.036	426.555	312.72	405.943	458.075	181.037	213.906	293.79	16.7942	14.1128	14.8915	10.9582	9.25632	10.5722	7.30949	7.42128	8.68397
sp|P37302|APE3_YEAST	7	781.859	825.42	1259.43	704.576	802.592	856.742	300.536	360.439	412.832	22.3169	15.9902	18.8929	10.609	7.86373	8.49645	5.21407	5.37339	5.24342
sp|P25371|ADP1_YEAST	7	267.554	353.58	487.766	355.416	454.378	403.016	265.878	345.666	418.971	15.0655	13.5124	14.4345	10.5572	8.78251	7.88456	9.09976	10.1658	10.4977
sp|P32901|PTR2_YEAST	7	1022.46	961.562	1535.34	979.071	1337.25	1178.3	542.306	683.724	800.705	20.8245	13.2916	16.4343	10.5192	9.34908	8.33808	6.71347	7.2731	7.25666
sp|Q06689|YL413_YEAST	7	863.531	892.714	1397.97	790.95	1026.75	1167.9	316.061	478.343	571.712	21.1861	14.8648	18.0256	10.2368	8.64703	9.95546	4.71324	6.12948	6.24147
sp|P27614|CBPS_YEAST	7	490.631	538.522	784.237	437.374	566.631	572.28	290.647	259.826	270.381	21.1022	15.7199	17.7272	9.92352	8.36569	8.55192	7.59825	5.83669	5.1747
sp|P07271|PIF1_YEAST	7	232.536	269.812	437.122	292.791	346.751	475.368	286.684	365.281	480.486	13.984	11.0123	13.8154	9.28837	7.15794	9.93239	10.479	11.4731	12.8576
sp|P05317|RLA0_YEAST	6	74.0401	219.298	210.194	528.319	515.632	411.107	521.91	399.353	384.818	4.54536	9.13711	6.78172	17.1095	10.866	8.76875	19.4747	12.8047	10.5122
sp|P36015|YKT6_YEAST	6	134.771	113.802	240.545	290.558	298.825	321.47	202.542	278.446	253.085	12.397	7.10466	11.6288	14.0992	9.43551	10.2741	11.3243	13.3774	10.3591
sp|P01123|YPT1_YEAST	6	184.494	193.134	415.894	670.417	719.803	953.682	567.46	722.756	967.19	7.0444	5.00488	8.34571	13.5035	9.43417	12.6517	13.1696	14.4133	16.4327
sp|P39077|TCPG_YEAST	6	148.232	99.0893	140.779	375.298	549.924	502.542	363.186	401.599	466.778	9.95495	4.51645	4.96882	13.2958	12.6773	11.726	14.8252	14.0864	13.949
sp|P25087|ERG6_YEAST	6	44.2007	66.6669	109.196	368.364	446.904	622.869	460.641	583.202	796.805	2.67864	2.74201	3.47785	11.7761	9.29668	13.1149	16.9677	18.4593	21.4869
sp|P32366|VA0D_YEAST	6	673.431	659.213	1077.42	671.832	771.425	744.818	300.339	446.436	457.549	21.1479	14.0499	17.7819	11.1295	8.31565	8.12656	5.73272	7.32225	6.39364
sp|P00358|G3P2_YEAST	6	360.507	496.207	602.937	647.735	865.253	1028.52	833.691	685.898	816.807	11.1314	10.3986	9.78426	10.5505	9.17083	11.034	15.6465	11.0613	11.2226
sp|P39109|YCFI_YEAST	6	363.122	363.154	565.825	326.563	398.316	409.487	182.974	224.202	244.384	21.4194	14.5385	17.5411	10.1616	8.06513	8.39223	6.56024	6.90726	6.41452
sp|P53943|AQR1_YEAST	6	685.539	760.86	1130.29	624.04	779.659	833.303	328.733	449.654	508.295	20.5058	15.4462	17.7686	9.84685	8.0053	8.66024	5.97672	7.0248	6.76545
sp|P46983|ATG36_YEAST	6	19.7482	50.8778	61.5257	331.712	359.945	430.368	604.962	843.124	980.988	1.10991	1.94072	1.81734	9.83471	6.94424	8.40393	20.6663	24.7493	24.5335
sp|P48813|GNP1_YEAST	6	391.279	426.645	611.612	414.766	733.163	635.414	263.727	375.662	401.953	17.555	12.9914	14.4215	9.81652	11.2913	9.90498	7.19191	8.80284	8.02465
sp|P36095|VPS24_YEAST	6	806.381	805.866	1282.21	688.471	803.873	798.355	416.431	549.244	596.98	21.5074	14.5876	17.9732	9.68665	7.35976	7.3982	6.75097	7.65111	7.08507
sp|P00925|ENO2_YEAST	6	353.625	434.445	623.79	451.458	546.78	738.688	506.136	484.722	552.562	14.343	11.9593	13.297	9.65948	7.61268	10.4097	12.4778	10.2683	9.97272
sp|P18962|DAP2_YEAST	6	266.05	332.671	433.041	248.915	341.86	390.729	132.7	170.086	212.89	19.4473	16.5039	16.6358	9.59816	8.57776	9.92327	5.8958	6.49347	6.9245
sp|P00942|TPIS_YEAST	6	227.004	312.184	447.753	291.537	340.52	488.306	301.111	291.099	366.953	14.0744	13.1365	14.59	9.53523	7.24717	10.5189	11.3475	9.42647	10.1238
sp|P39535|PHO90_YEAST	6	367.481	319.772	623.653	307.305	413.112	353.122	206.597	273.847	332.06	20.9362	12.3645	18.6735	9.23578	8.07905	6.9899	7.15423	8.1486	8.41815
sp|P60010|ACT_YEAST	6	150.292	554.482	449.35	238.68	470.094	397.527	1359.33	254.347	211.779	6.70505	16.7891	10.5359	5.61723	7.19912	6.16191	36.8609	5.92658	4.20422
sp|P05738|RL9A_YEAST	5	64.4033	151.789	167.246	401.91	395.585	278.234	387.377	332.185	289.265	5.20446	8.32495	7.10301	17.1331	10.9733	7.81196	19.0273	14.0203	10.4016
sp|P19882|HSP60_YEAST	5	42.1658	108.812	117.098	365.802	414.173	429.512	290.823	298.258	301.744	3.73565	6.54269	5.45223	17.0959	12.5955	13.221	15.6606	13.8009	11.8954
sp|P06367|RS14A_YEAST	5	63.5295	101.045	126.614	507.204	510.158	523.247	501.23	569.185	675.217	3.68176	3.97437	3.85639	15.5061	10.1488	10.5358	17.656	17.2284	17.4124
sp|P10659|METK1_YEAST	5	190.604	210.954	315.774	467.25	584.155	502.527	384.885	393.262	467.086	10.7776	8.09566	9.38396	13.9374	11.3383	9.87262	13.2281	11.6141	11.7523
sp|P10081|IF4A_YEAST	5	118.902	201.414	220.4	328.96	371.911	345.346	328.206	264.168	261.072	9.54078	10.9688	9.29448	13.9244	10.2438	9.62789	16.0072	11.071	9.32161
sp|P26783|RS5_YEAST	5	29.5344	73.0469	61.5842	232.41	356.603	381.79	294.857	293.297	306.237	3.08353	5.17601	3.37916	12.8002	12.7801	13.8493	18.7114	15.9933	14.227
sp|P39010|AKR1_YEAST	5	158.688	184.738	311.316	295.383	379.518	408.571	159.385	236.527	274.008	13.0278	10.2933	13.4322	12.7924	10.6952	11.654	7.95333	10.1419	10.0098
sp|P36018|YPT52_YEAST	5	237.652	223.972	414.526	538.943	571.37	745.998	425.005	612.418	780.864	10.4564	6.68817	9.58541	12.509	8.6295	11.4041	11.366	14.0734	15.288
sp|P28321|MGLL_YEAST	5	46.8636	66.0068	95.6816	334.971	453.926	580.138	381.247	487.947	729.357	3.15122	3.01235	3.38135	11.882	10.4775	13.5537	15.582	17.1367	21.8232
sp|P32854|PEP12_YEAST	5	264.999	303.119	430.87	310.089	367.025	390.739	163.412	208.618	237.492	18.4481	14.3217	15.7642	11.3876	8.77065	9.45097	6.91459	7.58526	7.35686
sp|P17064|FCY2_YEAST	5	211.767	243.843	362.133	233.051	283.466	255.504	118.452	133.008	165.851	19.395	15.1571	17.4308	11.2596	8.9117	8.13039	6.594	6.36239	6.75905
sp|P00729|CBPY_YEAST	5	220.526	220.424	342.03	218.507	272.692	200.9	111.2	133.171	143.019	21.424	14.5336	17.4632	11.1982	9.09374	6.78116	6.56631	6.75713	6.1826
sp|P32621|GDA1_YEAST	5	196.567	201.609	341.435	230.039	281.445	311.539	148.557	157.39	196.176	17.8887	12.4523	16.3303	11.0436	8.79203	9.85058	8.21742	7.48093	7.94419
sp|P38555|YPT31_YEAST	5	131.345	179.33	248.981	312.355	410.839	403.541	324.848	424.188	605.786	8.64981	8.01529	8.61743	10.8513	9.28737	9.23342	13.0031	14.5902	17.752
sp|Q12246|LCB4_YEAST	5	262.28	253.236	400.128	287.67	347.255	417.159	173.561	249.111	269.778	18.5229	12.1379	14.8512	10.7171	8.41823	10.2359	7.45025	9.18857	8.47787
sp|P00950|PMG1_YEAST	5	160.006	211.843	306.474	256.426	313.866	407.881	280.226	256.37	300.003	12.4296	11.1689	12.5122	10.5081	8.3694	11.0087	13.2314	10.4016	10.3701
sp|P22203|VATE_YEAST	5	142.027	166.699	275.177	195.859	200.908	235.245	187.45	198.543	259.42	14.3916	11.4642	14.6545	10.4694	6.98819	8.28213	11.5452	10.5076	11.6971
sp|Q06538|CSC1_YEAST	5	272.056	296.591	451.097	300.359	412.288	379.649	256.742	224.962	252.071	17.8045	13.1736	15.5153	10.3694	9.26193	8.6325	10.2128	7.6894	7.34059
sp|P00360|G3P1_YEAST	5	310.769	452.811	503.398	551.156	763.696	944.699	688.44	609.068	721.175	11.0153	10.8931	9.37757	10.3056	9.292	11.6342	14.832	11.2755	11.3746
sp|P38196|FUI1_YEAST	5	468.86	447.903	736.06	429.149	510.873	556.367	252.024	311.909	370.045	20.9734	13.5983	17.3045	10.1268	7.84454	8.64708	6.8524	7.28727	7.36574
sp|P0CS90|HSP77_YEAST	5	68.0616	96.1415	108.776	158.099	206.351	270.791	195.245	266.053	287.325	8.25709	7.91606	6.93549	10.118	8.5933	11.4141	14.3973	16.8579	15.5108
sp|P16521|EF3A_YEAST	5	117.028	232.978	220.386	250.195	379.536	454.584	367.109	278.131	321.013	8.84951	11.9569	8.75855	9.98041	9.85169	11.9433	16.8733	10.9847	10.8016
sp|P02406|RL28_YEAST	4	74.0185	182.798	221.015	369.686	126.518	139.086	290.447	190.756	173.846	7.7544	12.9973	12.1688	20.4306	4.54976	5.0626	18.4948	10.4375	8.10418
sp|P39743|RV167_YEAST	4	4.75299	6.93216	13.4577	185.791	253.816	168.112	121.684	199.295	147.705	0.943332	0.93377	1.40374	19.4519	17.292	11.5925	14.6793	20.6588	13.0446
sp|Q12464|RUVB2_YEAST	4	15.8526	28.7081	33.7309	225.633	233.598	239.391	238.07	266.92	276.779	2.13439	2.62332	2.38682	16.0256	10.7962	11.1986	19.4828	18.77	16.5822
sp|P42943|TCPH_YEAST	4	23.8044	49.8794	50.7458	237.214	291.285	285.422	205.914	253.614	258.233	3.04738	4.33375	3.41419	16.0195	12.8002	12.6952	16.0225	16.9572	14.7101
sp|P25343|RV161_YEAST	4	41.3022	44.645	62.8372	292.912	317.875	308.773	286.801	356.343	331.191	4.20016	3.08133	3.35836	15.7134	11.0963	10.9097	17.7275	18.9265	14.9867
sp|P12612|TCPA_YEAST	4	28.6484	40.4515	36.7946	208.255	284.019	246.865	197.433	232.167	214.154	4.06292	3.89355	2.74246	15.5802	13.8265	12.1641	17.0189	17.1969	13.5145
sp|P06634|DED1_YEAST	4	115.516	135.732	165.181	285.5	327.921	346.69	268.73	247.974	268.533	10.5937	8.44817	7.96134	13.8119	10.323	11.0466	14.9795	11.8775	10.9582
sp|Q06839|YP097_YEAST	4	53.5541	67.0925	91.4948	288.062	350.761	383.46	331.232	332.669	470.54	4.70919	4.00406	4.22833	13.3623	10.5875	11.7154	17.7036	15.2784	18.4114
sp|P02309|H4_YEAST	4	104.93	141.942	255.673	320.906	290.217	394.091	295.419	299.015	433.28	8.26222	7.58545	10.5804	13.3295	7.84419	10.7814	14.1387	12.2971	15.181
sp|P24004|PEX1_YEAST	4	32.8521	41.0743	51.9332	235.37	304.436	439.757	220.679	246.339	461.947	3.50301	2.9725	2.91033	13.2394	11.143	16.2919	14.3026	13.719	21.9183
sp|P07149|FAS1_YEAST	4	80.2078	133.105	128.423	258.09	299.352	380.438	286.838	292.433	301.396	7.49383	8.44024	6.30593	12.7203	9.60059	12.3496	16.2892	14.27	12.5303
sp|P33760|PEX6_YEAST	4	16.0429	29.7727	24.65	126.294	170.162	238.445	139.24	136.704	248.889	3.06241	3.8572	2.47296	12.7176	11.1499	15.8143	16.1555	13.6293	21.1409
sp|P08004|CHS1_YEAST	4	108.692	133.46	191.595	202.075	233.171	269.36	138.672	170.475	210.462	12.8301	10.6919	11.886	12.583	9.4479	11.0471	9.94938	10.51	11.0546
sp|Q04338|VTI1_YEAST	4	160.281	165.519	298.626	237.838	289.136	309.528	154.699	186.896	226.701	15.202	10.6547	14.8856	11.8998	9.41348	10.2	8.9183	9.25829	9.56774
sp|P07251|ATPA_YEAST	4	106.421	241.228	212.042	271.883	360.379	323.107	354.876	244.084	251.38	8.75164	13.4637	9.16438	11.7946	10.173	9.23189	17.7384	10.4836	9.19875
sp|P32566|SMI1_YEAST	4	97.2989	110.563	197.62	220.711	312.212	461.117	166.504	213.823	303.775	9.65205	7.4438	10.3029	11.5498	10.6314	15.893	10.0395	11.0784	13.4091
sp|P32939|YPT7_YEAST	4	111.862	139.379	229.719	209.293	241.624	305.306	185.291	203.548	251.616	11.6826	9.87934	12.6088	11.5306	8.66215	11.0783	11.7621	11.1029	11.6932
sp|P25353|NPP1_YEAST	4	213.751	238.344	356.563	274.936	320.641	378.059	161.243	181.735	262.407	16.9772	12.848	14.8837	11.5194	8.74188	10.4328	7.78418	7.53888	9.27404
sp|P40582|GST1_YEAST	4	12.3334	24.458	46.0873	126.272	182.384	256.877	154.035	185.201	279.138	2.10401	2.83178	4.13205	11.3635	10.6802	15.2255	15.972	16.5014	21.1895
sp|P53822|COS1_YEAST	4	160.986	202.044	329.457	194.759	246.429	236.962	112.655	147.435	164.076	16.7797	14.2928	18.0474	10.7086	8.81692	8.58139	7.13711	8.02617	7.60988
sp|Q12096|GNT1_YEAST	4	165.652	189.73	277.044	182.914	231.184	269.175	104.823	140.317	163.85	18.0193	14.0072	15.8383	10.4961	8.63233	10.1732	6.93064	7.97192	7.93093
sp|P13134|KEX2_YEAST	4	135.612	135.812	192.817	155.762	221.849	246.185	93.7944	144.455	183.903	17.2256	11.7082	12.8719	10.4371	9.67305	10.8648	7.24151	9.58343	10.3945
sp|P06775|HIP1_YEAST	4	160.154	164.03	260.836	154.387	172.907	205.01	86.3366	108.762	122.307	20.4201	14.1944	17.4786	10.3842	7.56767	9.08193	6.691	7.24285	6.93919
sp|P09232|PRTB_YEAST	4	208.411	244.435	349.11	200.754	253.149	259.856	101.931	133.787	151.749	20.0352	15.9481	17.6382	10.1807	8.35368	8.67937	5.956	6.71735	6.49135
sp|P36108|DID4_YEAST	4	401.89	425.22	663.965	370.632	415.751	446.806	249.532	319.161	291.248	20.2886	14.5691	17.6161	9.87025	7.20455	7.83693	7.65678	8.41523	6.54251
sp|P16474|GRP78_YEAST	4	165.719	305.659	269.374	270.514	400.897	372.758	336.565	288.901	379.018	11.4393	14.3198	9.77242	9.85048	9.49924	8.93998	14.1212	10.4157	11.6419
sp|P38085|TAT1_YEAST	4	335.946	304.143	523.088	285.301	350.419	367.848	168.561	217.712	216.173	21.9827	13.5071	17.9889	9.84817	7.87097	8.36301	6.70416	7.44056	6.29433
sp|P25376|AGP1_YEAST	4	190.566	214.98	324.065	222.913	291.135	276.485	286.845	293.915	334.417	14.6924	11.2491	13.131	9.06612	7.70493	7.40627	13.4421	11.8353	11.4728
sp|P14540|ALF_YEAST	4	224.418	310.944	444.294	273.35	368.088	433.765	661.96	295.742	349.609	12.4497	11.7073	12.9536	7.99947	7.00942	8.36062	22.3207	8.56891	8.63019
sp|P39517|DHH1_YEAST	3	26.9796	32.4991	42.1026	368.75	412.683	275.157	227.484	258.531	202.647	3.11392	2.54576	2.55388	22.4515	16.35	11.0341	15.9587	15.5846	10.4076
sp|P20449|DBP5_YEAST	3	19.0538	20.1578	23.9061	232.084	251.449	189.656	142.226	187.738	140.149	3.36164	2.41372	2.21665	21.6001	15.2282	11.6257	15.2519	17.2995	11.0026
sp|P0CX43|RL1A_YEAST	3	29.0116	87.0086	108.441	282.584	168.186	224.836	227.456	189.393	168.659	3.9089	7.95643	7.67883	20.0849	7.77859	10.5252	18.6275	13.3278	10.1118
sp|P28241|IDH2_YEAST	3	26.6768	49.8538	42.31	200.266	298.97	195.534	177.028	177.741	167.41	4.20848	5.33781	3.50795	16.6663	16.19	10.7176	16.9749	14.645	11.7519
sp|P04456|RL25_YEAST	3	64.1274	161.276	153.231	314.677	195.412	212.55	406.565	227.622	258.962	6.15263	10.5017	7.7265	15.9266	6.43572	7.08534	23.7095	11.4062	11.0558
sp|P23248|RS3A2_YEAST	3	27.923	402.45	77.3504	353.01	404.498	353.776	266.195	299.26	303.113	2.247	21.9799	3.27132	14.9854	11.1734	9.89126	13.0202	12.5777	10.8538
sp|P38626|NCB5R_YEAST	3	24.7987	38.783	44.1018	145.865	192.044	179.364	117.552	166.506	182.399	4.77759	5.07101	4.46534	14.8242	12.7001	12.006	13.7653	16.7541	15.6364
sp|Q02753|RL21A_YEAST	3	65.4353	145.128	144.674	525.463	562.33	571.014	621.643	564.297	654.111	3.49507	5.261	4.06119	14.8056	10.3101	10.5967	20.1818	15.7421	15.5464
sp|P31412|VATC_YEAST	3	48.6552	57.5184	95.3211	99.5691	107.805	99.0754	59.3802	71.0932	71.0437	13.2728	10.6491	13.666	14.3284	10.0949	9.39032	9.84576	10.1291	8.62371
sp|P42838|LEM3_YEAST	3	120.083	118.661	200.348	240.8	316.389	358.242	131.034	155.8	225.929	12.9461	8.68237	11.3517	13.6947	11.7086	13.4189	8.58649	8.77274	10.8384
sp|P02557|TBB_YEAST	3	34.5525	41.2786	50.5906	103.582	136.378	159.647	92.6194	105.409	127.094	8.34635	6.7673	6.42253	13.199	11.3081	13.3986	13.5986	13.2986	13.6609
sp|P36164|TVP38_YEAST	3	95.24	106.116	196.92	210.549	295.725	305.486	117.385	168.864	238.029	11.14	8.42406	12.1053	12.9915	11.8736	12.4148	8.34555	10.3161	12.3889
sp|P32857|PTM1_YEAST	3	59.0606	93.7652	129.52	162.567	182.532	362.134	102.801	141.951	168.542	8.72872	9.40519	10.0602	12.6743	9.26019	18.5953	9.23474	10.9573	11.084
sp|P32867|SSO1_YEAST	3	101.729	105.265	159.848	160.926	186.717	233.55	101.369	116.29	148.594	15.0535	10.5718	12.4314	12.562	9.4843	12.0076	9.11744	8.98765	9.78431
sp|P40850|MKT1_YEAST	3	56.7287	72.964	101.104	161.715	206.039	213.323	155.963	182.187	228.996	8.3255	7.26757	7.7982	12.5198	10.3797	10.8775	13.9125	13.9648	14.9545
sp|P40088|FTR1_YEAST	3	310.116	325.451	550.187	389.264	461.033	460.703	137.666	228.649	226.562	18.8208	13.4052	17.5486	12.4623	9.60448	9.71442	5.07826	7.24759	6.11838
sp|P18851|GBB_YEAST	3	63.2651	78.0912	124.654	128.179	144.227	198.734	91.267	118.488	150.256	11.4575	9.59848	11.8646	12.2457	8.96606	12.5049	10.0465	11.2076	12.1086
sp|P19097|FAS2_YEAST	3	22.8808	40.7082	43.23	108.21	157.363	177.141	125.015	134.371	176.897	4.86042	5.86892	4.82622	12.1258	11.4745	13.0739	16.1414	14.908	16.7209
sp|P50276|MUP1_YEAST	3	130.28	166.215	240.131	168.254	186.936	170.07	80.6771	111.006	112.77	17.6411	15.2754	17.089	12.0186	8.68901	8.00127	6.64009	7.85066	6.79483
sp|P32791|FRE1_YEAST	3	98.0545	113.773	171.636	113.642	113.661	128.348	51.1177	65.0538	75.1245	19.3207	15.2149	17.7739	11.8123	7.68769	8.78673	6.12212	6.69483	6.58679
sp|P28625|YIM1_YEAST	3	14.2355	90.1803	27.2773	185.79	226.426	301.729	228.206	300.551	405.477	1.68179	7.23074	1.69363	11.5787	9.18233	12.385	16.387	18.545	21.3157
sp|P38248|ECM33_YEAST	3	90.6132	133.109	178.131	159.218	225.32	275.271	103.269	109.544	169.073	12.4681	12.4305	12.8815	11.5568	10.6423	13.1598	8.63679	7.87239	10.3518
sp|P25694|CDC48_YEAST	3	22.5092	64.6834	62.5821	102.38	146.188	170.16	123.597	128.176	156.807	4.74423	9.25277	6.93226	11.3831	10.5766	12.4608	15.8339	14.1099	14.7064
sp|Q12116|TMS1_YEAST	3	299.066	354.152	555.36	403.426	511.947	496.795	261.511	345.744	383.912	15.717	12.6318	15.339	11.1843	9.23542	9.07115	8.35349	9.49005	8.97782
sp|P12709|G6PI_YEAST	3	63.83	77.329	103.346	124.472	165.243	215.719	143.033	121.117	157.459	10.8513	8.92225	9.2336	11.1627	9.64296	12.7418	14.7798	10.7541	11.9114
sp|P38139|LDH1_YEAST	3	13.8559	21.8998	32.2811	99.3623	163.569	162.746	135.338	148.979	236.559	2.91013	3.1217	3.56324	11.0088	11.7925	11.876	17.2771	16.3423	22.1082
sp|P39547|UIP3_YEAST	3	127.342	152.537	231.266	145.522	166.465	196.444	69.9972	102.684	111.24	18.1853	14.7842	17.3572	10.9627	8.16019	9.74697	6.07581	7.65883	7.0688
sp|P00359|G3P3_YEAST	3	210.718	219.863	385.652	388.274	603.631	582.921	369.449	472.392	571.225	11.075	7.84275	10.6526	10.7652	10.8904	10.6447	11.8024	12.9675	13.3594
sp|P38131|KTR4_YEAST	3	151.699	145.173	201.319	147.587	183.225	205.189	80.9249	108.927	116.9	20.8903	13.5682	14.5702	10.7214	8.66115	9.81744	6.7736	7.83445	7.1633
sp|P39524|ATC3_YEAST	3	37.4509	51.4185	79.0052	99.3364	149.266	165.429	105.085	135.015	181.939	7.63782	7.11705	8.46802	10.687	10.4495	11.722	13.0264	14.3814	16.5108
sp|Q08745|RS10A_YEAST	3	23.1433	56.8183	62.387	114.39	114.208	200.713	176.359	192.155	218.219	4.07142	6.78394	5.76811	10.6157	6.89677	12.2681	18.8579	17.6556	17.0824
sp|P38836|ECM14_YEAST	3	92.4403	112.947	150.941	100.049	131.937	125.647	59.705	66.584	82.9425	18.5578	15.3891	15.9255	10.5954	9.09203	8.76396	7.28537	6.98147	7.40933
sp|P39954|SAHH_YEAST	3	60.283	126.736	103.104	149.935	220.395	226.569	226.153	194.388	196.774	7.92677	11.3103	7.12518	10.4003	9.94791	10.351	18.075	13.35	11.5134
sp|P32486|KRE6_YEAST	3	102.222	128.777	178.438	125.301	207.027	201.65	80.4257	98.9473	117.892	15.8816	13.5788	14.5699	10.2694	11.0409	10.8851	7.59487	8.02908	8.15026
sp|P32487|LYP1_YEAST	3	133.355	156.473	220.25	133.499	156.593	186.362	88.5542	101.283	111.738	19.0323	15.1564	16.5203	10.0508	7.67155	9.24106	7.68186	7.5497	7.09609
sp|Q08157|YOL19_YEAST	3	154.667	159.203	240.377	129.808	161.855	178.721	67.7632	77.0631	84.6825	22.2768	15.5625	18.1956	9.8627	8.00219	8.94359	5.9323	5.79711	5.4273
sp|Q12359|ATO3_YEAST	3	125.195	135.86	241.314	129.745	145.854	196.012	85.1401	118.322	126.722	17.8652	13.1579	18.0977	9.7668	7.14444	9.71821	7.38466	8.81856	8.04655
sp|P30605|ITR1_YEAST	3	239.349	238.503	370.67	216.975	273.415	341.821	126.491	169.912	191.022	20.3922	13.7911	16.5973	9.75173	7.99618	10.1184	6.55038	7.56079	7.24188
sp|P16861|PFKA1_YEAST	3	30.5362	89.085	233.959	110.867	223.805	154.593	115.825	138.701	152.399	4.97629	9.85301	20.0378	9.53088	12.5196	8.75312	11.4728	11.8054	11.0512
sp|P00817|IPYR_YEAST	3	157.047	221.002	253.493	181.825	204.283	281.026	194.946	173.06	231.968	15.4567	14.7624	13.1121	9.4402	6.90158	9.60984	11.6621	8.89601	10.159
sp|P53871|DUG3_YEAST	3	70.1659	87.7229	140.24	116.382	133.283	163.733	176.503	180.576	218.547	10.531	8.93568	11.062	9.21441	6.86665	8.53807	16.1016	14.1551	14.5956
sp|P26755|RFA3_YEAST	3	86.355	78.2515	255.044	199.743	163.197	492.23	244.601	327.225	530.758	7.43371	4.57177	11.5386	9.07047	4.82235	14.7221	12.7983	14.7121	20.3306
sp|Q12266|YB11A_YEAST	3	210.793	190.189	315.032	147.004	176.828	296.129	179.37	198.211	237.787	19.794	12.121	15.5472	7.28195	5.69978	9.66143	10.2377	9.72114	9.93579
sp|P23301|IF5A1_YEAST	3	60.2398	131.048	128.611	67.1322	84.8328	107.749	262.266	86.8525	126.769	10.3875	15.3367	11.6553	6.10659	5.02135	6.4554	27.4881	7.82206	9.72696
sp|Q02326|RL6A_YEAST	2	14.4392	81.0869	85.0489	149.08	74.0651	64.0354	142.563	64.1004	61.3006	3.72246	14.1876	11.5232	20.2743	6.55433	5.73573	22.3392	8.63094	7.03214
sp|P21576|VPS1_YEAST	2	25.3834	40.3075	44.8697	204.423	234.315	207.758	131.929	143.478	141.805	4.57358	4.92908	4.24892	19.4302	14.4922	13.0061	14.4485	13.5022	11.3693
sp|P11745|RNA1_YEAST	2	23.4458	29.1737	67.2255	195.075	215.644	144.615	149.473	175.544	111.713	4.35797	3.68031	6.56708	19.1276	13.7589	9.33931	16.8872	17.0418	9.23973
sp|P02407|RS17A_YEAST	2	18.1303	53.9234	63.1098	108.562	45.9117	43.2079	133.029	53.7582	60.1779	5.81754	11.7432	10.6427	18.3761	5.05692	4.81703	25.9451	9.00928	8.59226
sp|P28834|IDH1_YEAST	2	6.11256	8.96437	10.3045	83.7029	105.015	89.2512	70.5771	78.6156	64.4006	2.53171	2.51991	2.24304	18.2882	14.9304	12.8436	17.7677	17.0063	11.8691
sp|Q12019|MDN1_YEAST	2	16.0358	14.9934	25.9853	105.038	129.565	115.538	68.761	78.1899	104.59	5.18844	3.29245	4.41868	17.928	14.39	12.9883	13.5227	13.2132	15.0582
sp|Q06705|CSR1_YEAST	2	6.41387	10.9903	18.7721	90.1536	133.23	102.587	72.1355	87.3449	64.5975	2.36778	2.75361	3.6421	17.5567	16.883	13.1581	16.1862	16.841	10.6114
sp|P25567|SRO9_YEAST	2	7.36823	18.0739	17.6399	100.527	108.046	76.8329	94.5434	117.6	91.9449	2.41171	4.01502	3.03443	17.3574	12.1395	8.73758	18.8091	20.1039	13.3914
sp|P40413|TCPE_YEAST	2	17.3662	26.5982	26.0976	159.726	225.899	174.816	133.519	144.372	137.554	3.54816	3.68828	2.80232	17.2153	15.8432	12.4097	16.5812	15.4061	12.5057
sp|P17076|RL8A_YEAST	2	27.1958	82.9104	90.2896	169.01	91.2532	106.323	221.191	108.342	90.2207	5.23483	10.8314	9.13393	17.1614	6.02945	7.11067	25.8787	10.892	7.72757
sp|P0CX53|RL12A_YEAST	2	37.2573	123.72	123.615	257.704	149.501	195.995	281.209	196.243	174.342	4.70094	10.5947	8.19717	17.1528	6.4751	8.59213	21.5664	12.9324	9.7884
sp|P0CX41|RL23A_YEAST	2	30.7655	38.3948	42.022	148.003	144.28	138.226	134.734	160.036	153.923	6.29787	5.33428	4.52091	15.9823	10.1383	9.83109	16.7642	17.1103	14.0207
sp|P0CX37|RS6A_YEAST	2	23.3469	91.606	70.0689	162.645	161.411	142.786	169.891	134.352	119.401	4.32571	11.5193	6.82296	15.8968	10.2657	9.19171	19.1326	13.0012	9.84402
sp|P33892|GCN1_YEAST	2	12.6244	11.9943	20.034	106.121	128.743	145.603	108.924	107.939	130.76	3.47949	2.24364	2.90196	15.4293	12.1803	13.943	18.2475	15.538	16.0367
sp|P47079|TCPQ_YEAST	2	20.3005	23.2129	34.7943	131.563	193.715	192.143	119.365	125.981	156.961	4.36389	3.38665	3.93092	14.9191	14.2942	14.3507	15.5962	14.1444	15.014
sp|P26786|RS7A_YEAST	2	15.9126	51.0752	46.5435	111.499	99.1104	65.3486	173.471	100.257	107.013	4.01831	8.75357	6.17703	14.853	8.59112	5.73351	26.6259	13.2229	12.0247
sp|P61830|H3_YEAST	2	158.673	359.087	371.351	466.842	397.953	347	536.265	217.243	270.424	9.55441	14.6748	11.7518	14.829	8.22547	7.25959	19.627	6.83215	7.24573
sp|P05744|RL33A_YEAST	2	14.5145	51.245	58.3395	92.1389	45.6492	65.1085	167.68	64.9244	75.7356	4.31491	10.3394	9.11488	14.4495	4.65834	6.72496	30.2988	10.0806	10.0186
sp|P15992|HSP26_YEAST	2	13.3171	19.9989	31.7899	80.013	88.9964	107.995	66.038	76.2149	137.302	4.51551	4.60232	5.66507	14.3119	10.3585	12.7228	13.6103	13.4973	20.7162
sp|P16622|HEMH_YEAST	2	24.6778	30.8183	35.9653	154.356	189.417	225.563	139.432	181.299	233.4	4.30971	3.65278	3.30099	14.2202	11.355	13.6865	14.8006	16.5367	18.1376
sp|Q08412|CUE5_YEAST	2	32.7712	36.9849	63.7384	190.486	196.597	284.386	148.999	199.631	387.911	4.5165	3.45945	4.61668	13.8488	9.30068	13.6176	12.4815	14.3697	23.7891
sp|P37020|GEF1_YEAST	2	20.7464	19.7813	54.7689	73.7286	79.8101	137.626	31.4246	76.4198	104.049	7.3471	4.75446	10.1936	13.7737	9.70196	16.9339	6.76422	14.1348	16.3964
sp|P07259|PYR1_YEAST	2	22.1321	37.2329	31.5058	89.8691	126.768	137.876	84.7869	83.5875	105.041	6.42033	7.33052	4.80335	13.7526	12.6233	13.8965	14.9499	12.6645	13.5591
sp|P0CX35|RS4A_YEAST	2	22.2809	106.865	77.5665	126.447	101.296	107.317	203.423	97.4695	99.0021	4.51999	14.7134	8.26985	13.5317	7.05384	7.56407	25.083	10.3272	8.93686
sp|P0CX55|RS18A_YEAST	2	17.0067	35.4957	37.7743	108.897	101.713	129.371	151.32	152.956	133.802	3.95818	5.60692	4.62052	13.37	8.12606	10.4615	21.4065	18.5931	13.8572
sp|P33328|SNC2_YEAST	2	56.7149	51.7123	130.289	146.068	157.104	221.548	91.1968	142.628	200.377	9.65639	5.97565	11.6585	13.1194	9.18192	13.1059	9.43783	12.6833	15.181
sp|Q08409|AUS1_YEAST	2	49.2963	62.0376	96.9774	77.3909	105.276	126.199	28.0899	32.1017	33.8482	15.7961	13.4916	16.3315	13.0817	11.5796	14.0499	5.47092	5.37247	4.82622
sp|P46989|ATG27_YEAST	2	33.7014	42.159	75.7783	89.9502	102.552	122.181	76.0401	85.0759	112.351	9.16072	7.77759	10.8254	12.898	9.56873	11.539	12.5632	12.0781	13.5892
sp|Q04947|RTN1_YEAST	2	33.7165	36.193	39.1764	157.543	181.859	207.395	191.532	228.288	273.002	5.15867	3.75831	3.1502	12.7155	9.55121	11.0249	17.812	18.2427	18.5865
sp|O13516|RS9A_YEAST	2	11.7256	62.7172	35.8261	90.1999	90.9011	133.699	139.727	93.8145	107.405	3.08505	11.1992	4.95389	12.5191	8.20966	12.2219	22.3451	12.8916	12.5744
sp|P24000|RL24B_YEAST	2	24.057	66.719	56.9503	88.4935	89.7295	132.178	126	77.4266	80.7743	6.40421	12.0544	7.96781	12.4273	8.19951	12.2255	20.3878	10.7653	9.56827
sp|P41544|SYS1_YEAST	2	70.326	75.9573	184.147	175.599	207.084	323.512	126.817	168.164	204.451	9.36851	6.86748	12.8925	12.34	9.46956	14.9736	10.2685	11.7003	12.1194
sp|P54867|SLG1_YEAST	2	74.1612	60.4971	105.804	82.7183	98.6298	74.0995	44.215	51.3243	70.1677	20.6596	11.4381	15.4905	12.1559	9.43153	7.17205	7.4867	7.46758	8.69799
sp|P32466|HXT3_YEAST	2	44.1607	47.124	83.4132	59.0388	61.5356	66.7837	35.0149	33.7675	51.0848	17.1763	12.4397	17.0509	12.1135	8.21576	9.02496	8.27791	6.85966	8.84139
sp|Q12675|ATC4_YEAST	2	95.8898	92.9959	134.122	137.118	181.949	202.385	76.6437	109.767	134.689	16.023	10.5465	11.7785	12.0867	10.4364	11.7499	7.78438	9.57978	10.0148
sp|Q12329|HSP42_YEAST	2	32.4259	35.4172	62.4248	84.1426	88.3196	125.383	99.8835	83.9697	126.134	8.80582	6.52778	8.90951	12.0541	8.2331	11.8304	16.4872	11.91	15.2421
sp|Q08144|TLG2_YEAST	2	38.7764	51.9687	83.3432	69.5627	81.7374	101.282	35.7788	65.984	75.5046	12.6061	11.4665	14.2398	11.9298	9.12146	11.4401	7.06994	11.2038	10.9226
sp|P28274|URA7_YEAST	2	43.3352	50.8645	80.8415	91.8372	134.898	114.19	98.3568	84.5259	106.565	10.6706	8.50032	10.4617	11.9291	11.402	9.76917	14.7206	10.8705	11.6761
sp|Q05892|YL290_YEAST	2	13.4428	34.3527	33.6146	71.6702	122.435	107.818	80.8283	88.1743	117.583	4.2111	7.30366	5.53418	11.8436	13.1656	11.7349	15.3902	14.4264	16.3903
sp|P38068|GLRX7_YEAST	2	51.6505	57.72	98.7774	79.949	90.5617	107.892	52.4999	73.0689	78.9458	14.3998	10.9215	14.473	11.7581	8.66675	10.4509	8.89645	10.6396	9.79374
sp|Q05521|DPP1_YEAST	2	89.4983	104.858	206.221	131.827	147.044	193.268	63.5021	100.216	104.219	15.0791	11.9904	18.2605	11.7167	8.50425	11.3136	6.50315	8.81878	7.81346
sp|P15565|TRM1_YEAST	2	10.7062	16.4241	18.9487	73.7056	91.6687	125.702	96.7404	110.211	156.793	3.22509	3.35786	2.99989	11.7124	9.47887	13.1562	17.7129	17.3398	21.017
sp|P39106|MNN1_YEAST	2	44.9632	58.8952	86.1333	63.4578	73.2088	91.0994	37.8181	40.7664	52.7993	15.5996	13.8679	15.7053	11.614	8.71863	10.9813	7.97501	7.38703	8.15119
sp|P40008|FMP52_YEAST	2	9.4679	14.9144	22.0735	75.5649	76.4444	150.938	62.1417	131.058	201.077	2.74089	2.93033	3.35837	11.5398	7.59648	15.1816	10.9344	19.8158	25.9022
sp|Q02725|VTC3_YEAST	2	186.751	220.77	347.985	217.227	287.267	294.009	111.879	113.786	122.777	18.365	14.7347	17.9848	11.2689	9.69709	10.0455	6.6873	5.84423	5.37255
sp|Q12003|ENV7_YEAST	2	94.3914	94.3244	127.095	106.01	124.038	148.729	67.8107	77.4918	90.4068	18.9809	12.873	13.4317	11.2453	8.56183	10.3911	8.28813	8.13861	8.08948
sp|P38084|BAP2_YEAST	2	96.4989	117.999	174.788	119.297	144.971	170.401	59.4824	81.4971	91.7764	17.235	14.3034	16.4066	11.2398	8.88786	10.5741	6.4573	7.60223	7.29382
sp|P53093|YIP4_YEAST	2	46.7084	69.8672	94.4753	99.6529	113.117	240.893	87.8709	103.547	115.347	9.77795	9.92658	10.3942	11.0048	8.12848	17.521	11.1808	11.3214	10.7447
sp|P38962|TVP23_YEAST	2	21.2646	41.1585	59.6213	72.8228	172.735	146.391	61.0941	70.0896	104.021	6.09069	8.00097	8.97491	11.0031	16.9832	14.5682	10.6361	10.4851	13.2577
sp|P47057|SNX4_YEAST	2	27.4141	30.1373	53.1046	69.3335	89.0263	110.791	76.4256	86.3708	138.9	8.18879	6.10975	8.33675	10.9252	9.12835	11.4983	13.8758	13.4748	18.4622
sp|P38932|VPS45_YEAST	2	39.9611	59.1784	86.297	69.7989	100.351	113.98	48.7556	63.7161	85.9456	11.8402	11.9003	13.438	10.9096	10.2064	11.7336	8.78052	9.86009	11.3313
sp|P38090|AGP2_YEAST	2	107.159	121.519	165.293	118.063	163.985	151.114	60.16	88.2362	93.4956	18.7396	14.4228	15.1916	10.8914	9.84382	9.18159	6.39461	8.05914	7.27543
sp|Q06815|MRL1_YEAST	2	73.52	82.0759	123.462	87.7053	109.558	133.738	59.0191	59.2609	78.503	17.2498	13.0698	15.2241	10.8554	8.82373	10.9023	8.4168	7.26205	8.196
sp|P26321|RL5_YEAST	2	35.5177	108.689	65.8625	114.069	156.115	143.153	207.668	119.318	137.208	6.37665	13.2436	6.21448	10.8033	9.62102	8.92957	22.6617	11.1883	10.9613
sp|P10592|HSP72_YEAST	2	43.1658	67.2694	75.1783	112.736	148.71	215.644	125.588	156.646	189.92	7.75761	8.20501	7.10067	10.6879	9.17396	13.465	13.7186	14.7034	15.1878
sp|P36008|EF1G2_YEAST	2	7.58213	40.3284	27.6412	71.3514	112.484	127.217	120.338	101.981	125.591	2.15265	7.7708	4.12437	10.6862	10.9623	12.549	20.7663	15.1221	15.8663
sp|P31116|DHOM_YEAST	2	33.8964	47.4026	63.2689	63.9105	92.3315	125.639	57.493	69.7002	90.3204	10.5953	10.0562	10.3937	10.5383	9.9069	13.6448	10.9232	11.379	12.5627
sp|P04911|H2A1_YEAST	2	33.4399	31.1996	75.7136	64.2559	59.1711	158.291	52.7499	64.9774	123.626	10.3012	6.52297	12.2579	10.4418	6.25693	16.9419	9.87688	10.4543	16.9461
sp|P07170|KAD2_YEAST	2	33.1478	73.3931	78.0725	76.5058	139.519	111.572	77.2294	82.9457	104.62	8.54716	12.8439	10.58	10.4064	12.3489	9.9955	12.1039	11.1705	12.0038
sp|P04807|HXKB_YEAST	2	48.7619	75.8776	82.1983	72.9206	79.251	125.154	82.9688	68.0117	84.2565	12.9666	13.694	11.4875	10.229	7.23399	11.563	13.4102	9.44582	9.96976
sp|P38778|SMF2_YEAST	2	71.0625	75.1067	104.611	74.7317	94.6795	90.0063	54.625	70.9014	84.3515	18.3161	13.1385	14.1706	10.161	8.37678	8.06024	8.55774	9.54462	9.67435
sp|Q08919|TRE1_YEAST	2	69.2957	82.8203	106.238	77.6651	93.1198	98.4637	58.6842	70.6352	95.9328	17.1637	13.9224	13.8294	10.1478	7.91727	8.47351	8.83489	9.13771	10.5732
sp|P04817|CAN1_YEAST	2	75.9776	89.4219	136.682	89.6257	109.766	143.139	70.3292	72.29	95.4463	16.2984	13.0189	15.4095	10.1422	8.08266	10.6684	9.16999	8.0993	9.11073
sp|P38069|MNN2_YEAST	2	99.0174	109.92	161.66	122.275	185.137	218.923	99.3335	105.131	135.999	15.5078	11.684	13.3064	10.1022	9.95317	11.9128	9.45606	8.59966	9.47789
sp|P38925|SMF1_YEAST	2	151.285	182.448	247.425	153.483	190.204	189.255	107.318	120.858	138.751	18.7408	15.3392	16.1084	10.0298	8.08797	8.14556	8.08051	7.81947	7.64827
sp|P47124|HOC1_YEAST	2	109.607	97.432	188.959	105.792	120.859	162.863	70.4712	80.1997	98.9762	19.6539	11.8573	17.8073	10.007	7.43907	10.1465	7.68065	7.51095	7.89729
sp|Q08986|SAM3_YEAST	2	75.7664	98.322	133.694	86.4725	135.211	137.452	50.3114	70.0097	83.8629	16.5788	14.6016	15.3747	9.98145	10.1558	10.4498	6.6914	8.00101	8.16548
sp|P40009|YND1_YEAST	2	45.9479	65.9832	77.7766	55.325	80.8162	88.1419	43.0964	50.2777	56.2481	15.4894	15.0965	13.7796	9.83856	9.35184	10.3237	8.83051	8.85231	8.43751
sp|P39968|VAC8_YEAST	2	218.621	239.329	359.742	204.724	270.845	302.657	121.191	142.829	177.768	19.8098	14.7182	17.1316	9.7858	8.42435	9.5284	6.67471	6.7595	7.16765
sp|P14180|CHS2_YEAST	2	171.254	170.03	264.819	155.866	191.139	234.909	122.292	112.4	126.702	20.274	13.6615	16.4766	9.73399	7.76742	9.66231	8.79979	6.94987	6.6745
sp|P27810|KTR1_YEAST	2	98.6695	110.257	148.341	96.12	141.544	141.472	74.9581	78.7962	87.4175	18.7755	14.2393	14.8351	9.64858	9.24548	9.35324	8.66968	7.83116	7.40192
sp|P0CX31|RS24A_YEAST	2	21.4065	62.9582	42.2372	56.222	69.8693	90.8981	108.181	66.4815	80.5309	6.95312	13.8791	7.21021	9.63342	7.79021	10.2582	21.358	11.2784	11.6395
sp|Q06810|OPY2_YEAST	2	74.6323	55.6904	108.951	55.7328	69.5477	71.7008	29.6836	35.6966	48.2598	24.3869	12.3505	18.7102	9.60683	7.80082	8.1402	5.8955	6.0921	7.01699
sp|Q03212|EAR1_YEAST	2	78.0324	71.502	124.446	66.3083	101.928	98.2106	40.8222	57.1925	54.4677	20.8101	12.9417	17.4421	9.3284	9.33085	9.09996	6.61714	7.96616	6.4636
sp|P39727|ERV46_YEAST	2	15.3642	39.4931	27.5687	43.9512	51.4558	69.9419	73.2431	74.1069	105.74	6.09494	10.633	5.74771	9.19751	7.00684	9.64005	17.6604	15.3543	18.6653
sp|P34730|BMH2_YEAST	2	58.5787	154.482	125.804	118.467	259.595	184.252	215.39	112.308	102.487	8.61019	15.4108	9.71821	9.18566	13.0978	9.40952	19.243	8.62173	6.70313
sp|P02293|H2B1_YEAST	2	130.391	366.647	320.025	207.945	265.386	261.708	390.768	190.898	212.215	10.2606	19.5815	13.2351	8.63203	7.16854	7.15523	18.6904	7.84579	7.43082
sp|P53633|PRA1_YEAST	2	4.12466	20.2288	27.9001	60.7476	120.655	145.405	106.322	139.566	187.383	1.09292	3.63784	3.8853	8.49121	10.9742	13.3863	17.1237	19.3148	22.0936
sp|P53322|TNA1_YEAST	2	298.695	321.584	480.308	188.351	207.579	229.097	104.895	161.16	168.71	24.038	17.5646	20.3147	7.99612	5.73433	6.40579	5.13098	6.77391	6.04154
sp|P43555|EMP47_YEAST	2	27.3199	37.7538	54.9943	63.5048	94.3185	123.036	138.367	155.369	216.648	6.04259	5.66732	6.39264	7.40952	7.16092	9.45492	18.6016	17.9481	21.3223
sp|P25560|RER1_YEAST	2	12.5036	10.2786	27.4152	103.505	108.333	190.685	356.853	410.428	627.018	1.3859	0.773223	1.59701	6.052	4.1218	7.34338	24.0415	23.7599	30.9253
sp|Q12436|ZRT2_YEAST	1	114.16	107.348	168.562	92.0512	99.8708	108.771	54.7801	62.7495	82.3802	22.8794	14.6015	17.7545	9.73195	6.87064	7.574	6.6731	6.56828	7.34665
sp|P53262|VOA1_YEAST	1	258.815	247.309	425.918	230.408	254.112	280.251	120.254	147.964	163.434	21.9382	14.2274	18.9739	10.3027	7.39376	8.25355	6.19564	6.55056	6.16439
sp|P38109|YBY9_YEAST	1	44.3425	54.1775	68.4521	36.931	46.2553	52.4963	24.5758	25.4621	27.2549	21.0103	17.4223	17.0458	9.2309	7.5232	8.64219	7.07775	6.30112	5.74637
sp|Q08287|NOP8_YEAST	1	39.0102	48.4279	70.0973	56.7722	54.2075	58.3377	7.13102	4.84119	3.04372	21.0003	17.6936	19.832	16.1222	10.0169	10.9114	2.33332	1.36116	0.729102
sp|Q08485|NRT1_YEAST	1	31.5527	34.2617	45.2053	24.2891	35.758	36.2711	27.1875	23.2688	24.4777	20.249	14.9228	15.2467	8.22278	7.87714	8.08742	10.605	7.79924	6.98995
sp|P40476|PRM5_YEAST	1	24.186	25.3548	37.2542	26.8176	27.8757	29.9603	14.0512	16.084	17.5781	20.1783	14.3567	16.3349	11.8027	7.98317	8.68459	7.1254	7.00852	6.52573
sp|P53241|VHT1_YEAST	1	79.6906	85.7589	142.745	82.7923	89.8023	104.461	35.305	50.1998	58.8807	20.0435	14.6393	18.8689	10.9849	7.75323	9.12857	5.39731	6.59446	6.58985
sp|P32900|SKG6_YEAST	1	45.2317	44.0648	72.2179	42.5826	58.1954	65.0747	25.5842	26.1976	41.1912	20.0402	13.2503	16.816	9.9525	8.85069	10.0174	6.8898	6.06223	8.12083
sp|P53344|COS6_YEAST	1	127.777	147.225	220.137	125.54	148.831	148.932	73.6104	75.8821	99.1554	19.9357	15.5895	18.0505	10.3324	7.97077	8.07325	6.98059	6.18342	6.88384
sp|P14772|BPT1_YEAST	1	23.369	31.8821	31.5422	24.2339	30.5771	28.3126	12.803	16.1837	19.7707	19.5176	18.072	13.8451	10.677	8.76617	8.21575	6.49938	7.0595	7.34757
sp|P29029|CHIT_YEAST	1	57.7924	70.2144	100.332	66.6509	66.3913	85.3838	28.1133	34.4743	34.4411	19.5106	16.0879	17.8015	11.8699	7.69376	10.0151	5.76881	6.07863	5.17383
sp|P21375|OSM1_YEAST	1	24.2114	20.285	40.2776	24.8514	28.5181	35.7883	14.6079	19.4457	25.0979	19.4183	11.0418	16.9775	10.5144	7.85129	9.97275	7.12122	8.14566	8.95706
sp|Q03697|YMD8_YEAST	1	24.4432	22.9683	42.8046	19.2798	30.0842	32.4489	16.7623	19.4701	26.8174	19.309	12.3141	17.7709	8.03422	8.15771	8.90601	8.0484	8.03305	9.42658
sp|P38993|FET3_YEAST	1	22.3074	19.668	37.2527	27.4985	33.9441	40.5621	10.6782	13.5562	15.5442	19.2351	11.5101	16.8819	12.5082	10.047	12.152	5.59651	6.10511	5.96416
sp|P40501|AVT7_YEAST	1	46.2501	47.1322	74.0341	53.3443	57.658	69.9461	27.7055	36.1822	40.9081	19.0077	13.1465	15.9907	11.565	8.13403	9.98765	6.92084	7.76647	7.48106
sp|P54070|KTR6_YEAST	1	33.9664	32.2927	54.6883	35.2308	45.5049	48.2822	22.4977	33.4411	28.9804	18.9079	12.2003	15.9995	10.3456	8.69521	9.33819	7.61213	9.72266	7.1785
sp|P40039|FCY21_YEAST	1	52.4291	62.5469	93.3182	45.8429	66.3591	71.8403	31.4328	40.9472	48.7229	18.8582	15.2689	17.6406	8.69841	8.19326	8.97797	6.87204	7.69242	7.79825
sp|P53728|CYP8_YEAST	1	29.5768	37.3524	51.1347	35.5627	42.5268	49.2965	27.6151	27.0025	26.1087	16.921	14.5033	15.3748	10.7327	8.35154	9.79881	9.60278	8.06845	6.64656
sp|P32802|TMN1_YEAST	1	18.6275	10.3924	29.1574	15.2121	28.2122	31.9616	16.278	27.9981	35.4717	16.9157	6.40508	13.9156	7.28727	8.79429	10.0843	8.98486	13.2793	14.3335
sp|P38355|YB8B_YEAST	1	31.3807	41.3328	59.9452	44.0959	44.6066	50.72	20.6725	27.3675	29.9298	16.7533	14.9764	16.8195	12.4187	8.1746	9.40806	6.70821	7.63106	7.11015
sp|P05316|FUR4_YEAST	1	17.8791	21.9874	31.5173	20.7288	36.3099	30.7778	13.8349	21.4913	23.1187	15.7693	13.1618	14.6095	9.64452	10.9931	9.43162	7.41682	9.90011	9.07332
sp|P41815|BAP3_YEAST	1	19.0947	24.8955	36.5637	25.0791	32.9454	32.5242	14.399	21.7453	26.525	15.5294	13.7415	15.6282	10.7595	9.19738	9.1903	7.11784	9.23671	9.59914
sp|P38999|LYS9_YEAST	1	25.083	33.7643	37.2088	32.1353	39.6978	43.922	25.5479	32.2298	36.2759	15.4932	14.1544	12.0789	10.4709	8.41699	9.42597	9.59162	10.3975	9.97048
sp|Q07716|AIM6_YEAST	1	16.0676	21.4182	29.7273	19.3256	32.6698	33.032	15.9454	15.4982	16.1032	15.44	13.9685	15.0131	9.79643	10.7763	11.0284	9.31334	7.77835	6.88562
sp|P46993|ASG7_YEAST	1	37.3244	27.9327	65.4615	39.7861	51.0394	60.3781	47.3126	61.5477	80.0762	15.129	7.68431	13.9452	8.50727	7.10154	8.50316	11.6566	13.0299	14.443
sp|Q04121|NHX1_YEAST	1	30.7701	43.5539	49.7387	45.225	70.4598	54.1563	33.412	29.1836	46.2904	14.6889	14.1111	12.4788	11.3888	11.546	8.98237	9.69477	7.27629	9.83302
sp|P38146|YPT10_YEAST	1	28.5668	23.3195	45.964	49.2937	44.2459	54.5932	32.7915	45.2941	61.6283	14.3034	7.92446	12.0952	13.0199	7.60463	9.49724	9.9796	11.8448	13.7307
sp|P41277|GPP1_YEAST	1	28.0074	38.6676	52.3349	39.3252	48.6928	69.3905	32.048	33.4125	38.616	14.1854	13.292	13.9309	10.507	8.4657	12.211	9.8661	8.83872	8.70308
sp|Q03322|TLG1_YEAST	1	69.9159	75.7048	114.261	103.298	118.973	178.865	71.2901	98.5301	135.422	14.1566	10.4035	12.1591	11.0335	8.26913	12.5832	8.77378	10.4199	12.2014
sp|Q05031|DFG5_YEAST	1	25.7017	21.3871	35.7502	40.5944	49.0415	70.7478	26.7456	33.5291	59.3052	14.1224	7.97574	10.3239	11.7666	9.24992	13.5064	8.9325	9.62229	14.5002
sp|P38995|ATU2_YEAST	1	16.4122	17.6221	32.7956	27.8846	37.6216	36.4028	18.7632	18.7013	23.0857	13.9887	10.1939	14.6908	12.5376	11.0072	10.7802	9.7206	8.32518	8.75569
sp|Q08693|TRE2_YEAST	1	46.9359	57.5068	83.7524	79.092	86.4347	88.3196	59.2109	63.9897	77.7139	13.9669	11.6141	13.0981	12.4156	8.82897	9.1313	10.7095	9.94522	10.2903
sp|P31381|FUN26_YEAST	1	22.2369	25.6303	50.0396	29.6564	45.1863	48.0311	24.1719	29.9072	36.8368	13.8567	10.8396	16.3877	9.74864	9.66542	10.399	9.15527	9.73357	10.2142
sp|P23968|VATO_YEAST	1	43.4954	57.4648	95.7251	67.0243	72.6094	69.2315	53.921	58.2602	76.529	13.8346	12.405	16.0017	11.2459	7.92763	7.65082	10.4245	9.67843	10.8314
sp|P25639|YCV1_YEAST	1	39.6947	36.2016	64.8498	49.0899	61.2085	71.4737	61.8475	86.0643	94.7186	13.466	8.33506	11.5621	8.78496	7.12767	8.42434	12.7528	15.249	14.2981
sp|P13099|TOP3_YEAST	1	23.0953	27.784	47.2525	24.829	36.7035	53.2602	35.6751	41.6307	49.3979	13.0929	10.6901	14.0785	7.42525	7.14246	10.4905	12.2928	12.3264	12.4611
sp|P40474|QDR2_YEAST	1	13.8194	17.9534	39.2969	21.5853	32.1458	26.1562	16.6125	15.8725	22.2485	12.9816	11.4462	19.4007	10.6964	10.3656	8.53684	9.48528	7.78748	9.29988
sp|P35187|SGS1_YEAST	1	26.1798	26.711	50.9405	40.2197	47.0938	60.4802	39.6323	50.0044	59.6661	12.6943	8.79037	12.9815	10.2878	7.83855	10.1892	11.6807	12.6638	12.8738
sp|Q05931|HSP7Q_YEAST	1	20.8069	32.4556	38.9336	33.9805	45.9692	45.1466	26.8736	46.077	36.3534	12.2926	13.0137	12.0887	10.5903	9.32251	9.26712	9.65025	14.2178	9.55694
sp|P38736|GOSR1_YEAST	1	22.3397	19.6947	43.5932	46.4085	49.9673	78.7421	23.4999	37.1316	46.5045	12.276	7.34515	12.5897	13.4529	9.42524	15.0337	7.84908	10.6569	11.3713
sp|P39676|FHP_YEAST	1	17.9841	26.784	29.812	34.1412	30.9359	49.4493	43.6925	23.0841	32.9026	11.9183	12.0469	10.3833	11.9356	7.03747	11.3859	17.5998	7.99005	9.70269
sp|Q12455|SPSY_YEAST	1	12.8141	24.407	9.73701	15.3711	37.1552	51.252	22.0939	26.7179	20.8187	11.669	15.0845	4.66003	7.38396	11.6143	16.2158	12.229	12.7074	8.43596
sp|P01120|RAS2_YEAST	1	12.9357	13.1919	19.6936	31.0403	32.4698	41.5918	21.1286	30.8577	28.6689	11.1586	7.72325	8.92819	14.1249	9.61452	12.4655	11.0781	13.9025	11.0044
sp|P39548|YAJ8_YEAST	1	15.396	20.3485	42.9057	34.1905	47.7041	42.8478	17.1967	28.5973	28.7393	11.0579	9.91904	16.1956	12.9542	11.7611	10.6924	7.5073	10.7275	9.18494
sp|P23254|TKT1_YEAST	1	13.0929	20.2539	17.4368	20.3097	35.2975	36.767	34.8432	21.9972	35.2034	10.9162	11.4609	7.64052	8.93266	10.1021	10.6507	17.6575	9.5789	13.0605
sp|P39980|SIT1_YEAST	1	12.9062	17.2218	20.3807	28.1939	39.8541	39.4352	19.543	29.8798	31.3625	10.8455	9.82206	9.00096	12.4982	11.4961	11.5138	9.98199	13.1141	11.7273
sp|P32589|HSP7F_YEAST	1	12.0462	16.6905	26.6749	16.4875	30.5282	33.0519	29.7342	26.1264	26.4688	10.7989	10.1548	12.5676	7.79696	9.39421	10.2946	16.2017	12.2327	10.5585
sp|P06780|RHO1_YEAST	1	13.4477	17.4599	35.4747	24.7327	25.7019	34.0311	26.381	29.8266	34.8992	10.7774	9.49685	14.9418	10.4563	7.07063	9.47595	12.8508	12.4847	12.4456
sp|P39719|FLC2_YEAST	1	11.1424	15.6679	20.8235	22.597	27.3431	51.0896	14.1306	22.0629	26.0437	10.7679	10.2763	10.5761	11.5198	9.07045	17.1541	8.30019	11.1359	11.1993
sp|P53109|AIM14_YEAST	1	14.93	22.2054	27.7698	29.7654	47.3137	49.3842	36.7804	33.3993	40.1949	9.86246	9.95537	9.64089	10.3724	10.7285	11.3343	14.7678	11.5232	11.815
sp|Q99260|YPT6_YEAST	1	10.2494	16.9726	24.1429	21.5791	31.4846	30.8194	16.7184	23.3591	33.2661	9.80611	11.021	12.1397	10.8911	10.3401	10.2448	9.72228	11.6725	14.1624
sp|P32337|IMB3_YEAST	1	13.2559	15.5382	21.922	32.6433	59.2652	41.9611	32.1561	29.0088	34.5812	9.63719	7.66682	8.37607	12.5192	14.79	10.5991	14.2095	11.0149	11.1871
sp|Q02892|NOG1_YEAST	1	11.4584	14.534	19.3852	33.4018	38.2996	36.8512	31.9339	25.6826	25.6621	9.60276	8.26667	8.5381	14.7667	11.0178	10.7302	16.2667	11.2414	9.56975
sp|P36105|RL14A_YEAST	1	10.4036	21.192	23.8204	31.3163	19.7679	17.6911	35.7971	15.5523	26.7557	9.58466	13.2507	11.5335	15.2196	6.25147	5.66278	20.0454	7.48339	10.9685
sp|P07342|ILVB_YEAST	1	10.0335	14.9236	10.9867	28.4265	34.1433	40.6735	23.7519	27.9976	21.412	9.52206	9.61225	5.4798	14.2312	11.1228	13.4113	13.701	13.8775	9.04215
sp|P41940|MPG1_YEAST	1	15.9092	29.1306	31.8154	38.563	48.1249	48.4299	48.6811	29.6144	36.2938	9.50961	11.8178	9.99472	12.1598	9.87444	10.058	17.6868	9.24545	9.65345
sp|Q04958|NTE1_YEAST	1	30.421	210.72	50.0021	34.384	51.6767	51.0302	68.235	39.6816	34.0539	9.19969	43.2493	7.94707	5.48525	5.36442	5.36178	12.5424	6.26758	4.5825
sp|Q04053|SNX41_YEAST	1	11.2583	7.04621	23.8745	29.0302	36.5812	47.724	26.2388	33.3376	49.5359	8.76522	3.72322	9.76884	11.9229	9.77634	12.9095	12.4168	13.5561	17.1611
sp|P0CX46|RL2B_YEAST	1	22.6046	50.8111	44.2924	85.9259	47.7088	74.2516	74.492	53.5687	50.3452	8.57766	13.0859	8.83324	17.2003	6.21439	9.78948	17.1813	10.6168	8.50092
sp|P22146|GAS1_YEAST	1	22.4962	73.2221	43.8981	34.3132	199.31	97.2674	21.4499	31.713	39.017	8.56878	18.9289	8.78769	6.89463	26.0596	12.8724	4.96604	6.30897	6.61302
sp|P14126|RL3_YEAST	1	25.3541	55.1193	55.0967	87.7137	72.4498	61.2575	93.7088	60.9154	56.4031	8.50767	12.5528	9.71643	15.5264	8.34503	7.14173	19.1125	10.6758	8.42173
sp|Q12122|HOSM_YEAST	1	9.62352	14.2748	12.5807	37.4158	40.8514	38.8859	29.8947	27.5634	27.6983	8.14956	8.20434	5.59917	16.7146	11.8751	11.4413	15.3875	12.1911	10.4373
sp|P25379|STDH_YEAST	1	9.8736	9.68146	13.9347	29.4356	41.1824	37.2468	35.2647	34.6936	44.1879	7.86174	5.23188	5.83123	12.3639	11.256	10.3042	17.0671	14.4279	15.6561
sp|Q12207|NCE2_YEAST	1	20.9593	16.8504	50.8521	85.1676	77.8343	153.848	36.1349	61.6142	74.8545	7.71492	4.20958	9.83745	16.5375	9.83454	19.6756	8.08456	11.8453	12.2605
sp|P38708|YHI0_YEAST	1	8.89132	12.807	12.848	29.2099	38.9913	46.6049	32.0003	28.8327	28.0491	7.64438	7.47303	5.80537	13.2479	11.5073	13.9216	16.7226	12.9471	10.7308
sp|P00830|ATPB_YEAST	1	22.1885	120.301	45.666	43.6937	52.7962	55.973	123.613	40.2429	36.5323	7.37491	27.1376	7.97702	7.66104	6.02365	6.46383	24.9728	6.98601	5.40309
sp|P13586|ATC1_YEAST	1	10.6189	16.7021	20.6185	36.1407	48.668	46.4119	32.8582	28.429	56.2396	7.34707	7.84295	7.4974	13.1908	11.5586	11.157	13.8183	10.2732	17.3146
sp|P39931|SS120_YEAST	1	15.6236	17.9884	21.1574	34.5014	38.3585	37.8425	59.4262	83.8672	112.007	7.32709	5.72554	5.21472	8.53546	6.17505	6.16612	16.9396	20.5425	23.3739
sp|P48164|RS7B_YEAST	1	18.6498	23.0215	32.8469	76.51	65.3081	81.4933	70.5369	76.6301	69.3604	7.27398	6.09404	6.73304	15.7419	8.74367	11.0434	16.722	15.6102	12.0378
sp|P38720|6PGD1_YEAST	1	11.4514	27.0668	17.9693	25.6904	108.16	54.8588	30.6058	30.0559	32.9441	7.24932	11.6292	5.97845	8.57925	23.5036	12.0661	11.7765	9.93755	9.28009
sp|Q00245|RHO3_YEAST	1	18.3977	21.1673	35.4226	57.4233	67.3899	99.1945	59.893	71.333	92.0522	7.2463	5.65838	7.3325	11.9311	9.11121	13.5745	14.3385	14.6742	16.1333
sp|P04840|VDAC1_YEAST	1	16.2673	28.126	38.6656	48.0978	66.1288	83.6839	52.4872	62.3814	69.2818	7.13049	8.36729	8.90733	11.1216	9.94999	12.7446	13.984	14.2814	13.5132
sp|P38295|MCFS2_YEAST	1	18.3449	17.1359	25.6409	67.3157	87.1772	104.165	55.9348	79.3414	88.0781	7.06368	4.47812	5.18881	13.6733	11.5225	13.9354	13.091	15.9561	15.0911
sp|P05740|RL17A_YEAST	1	13.8511	38.3794	24.5323	43.2317	34.456	38.6705	94.1277	40.3941	39.7778	7.03562	13.2309	6.549	11.584	6.00774	6.82464	29.061	10.7163	8.99073
sp|P34221|PP2C3_YEAST	1	7.9145	9.91103	15.1688	35.335	39.559	38.5348	26.5276	34.689	35.15	6.70133	5.69547	6.75006	15.7827	11.4977	11.3363	13.6524	15.3405	13.2434
sp|P32905|RSSA1_YEAST	1	14.3127	25.7962	33.7396	45.7738	64.3732	53.172	73.7803	56.298	58.0226	6.67763	8.16827	8.27294	11.2657	10.3094	8.61918	20.9226	13.7184	12.0458
sp|P07280|RS19A_YEAST	1	8.20007	29.2419	18.9373	16.7052	20.1642	25.3031	65.0276	20.2313	24.7053	6.63387	16.0557	8.05167	7.1292	5.59962	7.11222	31.9758	8.54838	8.89356
sp|P0CX82|RL19A_YEAST	1	34.9451	127.417	107.191	142.077	83.1804	94.9697	211.216	92.0736	100.245	6.52775	16.1539	10.5234	14.0004	5.33367	6.16374	23.9816	8.98303	8.33251
sp|P10664|RL4A_YEAST	1	9.68161	29.4367	27.0322	40.2854	31.385	33.6426	55.7993	32.3887	25.3607	6.46744	13.3459	9.49041	14.1962	7.19673	7.8083	22.6563	11.3003	7.53845
sp|P26785|RL16B_YEAST	1	19.6461	59.8295	55.0169	106.954	47.6786	56.7772	111.945	54.3527	62.4006	6.42288	13.2752	9.45297	18.4455	5.35063	6.44925	22.245	9.2808	9.07775
sp|P25443|RS2_YEAST	1	19.1043	43.4746	34.8378	68.6412	94.4987	90.3749	88.2606	72.9716	91.0935	6.38384	9.85961	6.11815	12.0997	10.8394	10.4925	17.9264	12.7355	13.5449
sp|P11076|ARF1_YEAST	1	6.6463	8.10889	15.6436	27.3419	26.1468	33.1144	29.168	28.9368	37.3088	6.34679	5.25544	7.85108	13.7735	8.57079	10.9868	16.9299	14.4323	15.8534
sp|P12688|YPK1_YEAST	1	7.77295	12.4165	7.24253	34.3884	53.2664	47.9059	28.9859	40.2545	33.7476	6.13321	6.64928	3.00339	14.3138	14.4273	13.1333	13.9016	16.5893	11.849
sp|P0C0W1|RS22A_YEAST	1	17.3234	67.2668	38.3801	32.9274	50.9223	61.8573	144.113	47.4866	75.5132	6.06801	15.9914	7.06542	6.0843	6.12279	7.52812	30.6825	8.68751	11.7699
sp|P07213|TOM70_YEAST	1	8.71806	17.4224	19.8416	28.7695	37.0774	46.5469	36.6161	42.3187	55.0185	6.05896	8.21787	7.24726	10.5475	8.84537	11.2396	15.4677	15.3611	17.0147
sp|P00931|TRP_YEAST	1	11.3235	14.1392	21.5562	68.959	91.9958	57.3241	43.8507	52.0313	41.4794	5.88516	4.98742	5.88801	18.9064	16.4125	10.3513	13.8525	14.1239	9.59282
sp|P09733|TBA1_YEAST	1	11.5769	14.3023	20.3993	61.6776	81.1399	83.5973	38.1733	51.9586	61.5943	5.81209	4.87326	5.38238	16.3346	13.9831	14.5819	11.6486	13.6241	13.7599
sp|P0C2H6|RL27A_YEAST	1	8.63748	17.9249	21.5043	47.5416	22.5508	30.9947	60.0672	36.8233	39.1133	5.80318	8.17351	7.59317	16.8497	5.20079	7.23516	24.5296	12.9215	11.6934
sp|P53622|COPA_YEAST	1	13.6591	23.2584	31.2957	73.6043	81.0566	99.3451	72.6572	71.7282	91.7553	5.06804	5.85694	6.10269	14.4066	10.3237	12.807	16.3859	13.9001	15.149
sp|P05743|RL26A_YEAST	1	27.0959	79.6533	66.9321	140.802	118.509	133.006	183.061	146.452	177.636	4.9781	9.932	6.46269	13.6461	7.47377	8.49011	20.4423	14.0529	14.522
sp|P11972|SST2_YEAST	1	9.5176	12.5841	16.9436	63.1373	81.6664	55.2704	56.3043	54.2285	50.83	4.93985	4.43284	4.6218	17.2867	14.5498	9.96693	17.7625	14.7003	11.7393
sp|P38264|PHO88_YEAST	1	7.56832	15.0192	15.0368	42.7748	47.4788	66.5433	51.1362	52.6968	63.7129	4.33461	5.83809	4.52611	12.9235	9.33424	13.2415	17.8014	15.7633	16.2373
sp|P0CX51|RS16A_YEAST	1	11.6557	49.2022	53.5305	88.4994	57.1093	62.8555	132.542	63.3661	69.9253	3.80803	10.9099	9.19142	15.2526	6.40468	7.1349	26.3203	10.8126	10.1656
sp|P39938|RS26A_YEAST	1	4.05876	19.2141	16.7981	27.4163	26.6455	34.3647	38.908	27.3957	19.5843	3.75295	12.0579	8.16316	13.373	8.4573	11.0401	21.8672	13.2304	8.05793
sp|P36114|YKR18_YEAST	1	8.1973	15.7679	17.0659	83.67	106.577	91.9268	80.7209	84.8825	74.2427	3.07059	4.00864	3.35968	16.5333	13.7038	11.964	18.3786	16.6066	12.3749
sp|Q12452|ERG27_YEAST	1	3.62372	9.64309	16.2314	26.8935	36.1673	46.1334	34.3745	38.7937	58.4097	2.82056	5.09413	6.6398	11.0425	9.66328	12.4761	16.2627	15.7708	20.2303
sp|P38701|RS20_YEAST	1	10.0697	50.6016	41.2265	80.0392	107.03	128.944	129.796	99.7795	117.94	2.69727	9.19912	5.80369	11.3097	9.84108	12.0003	21.1322	13.9592	14.0574
sp|P20606|SAR1_YEAST	1	3.25207	8.88863	12.0614	46.5032	31.5581	40.1713	34.8312	41.5195	51.2974	2.48958	4.61821	4.85269	18.7797	8.29287	10.6847	16.2072	16.6008	17.4742
sp|P38217|IMB2_YEAST	1	7.27784	12.7935	12.2683	119.464	146.679	100.677	71.9358	91.2817	75.5043	2.46077	2.93584	2.18008	21.3082	17.0241	11.8272	14.7839	16.1199	11.36
sp|P54783|ALO_YEAST	1	3.0578	14.7582	12.4932	25.8304	74.3666	61.8977	20.7983	32.052	44.9161	2.35818	7.72457	5.06361	10.5085	19.6867	16.5853	9.74923	12.9102	15.4137
sp|P49167|RL38_YEAST	1	9.00666	44.4423	48.0657	97.3454	74.6114	113.274	128.201	105.729	175.259	2.29832	7.69691	6.44616	13.104	6.53552	10.0429	19.8844	14.0913	19.9005
sp|P16603|NCPR_YEAST	1	2.7307	11.4709	10.3733	34.3751	46.4337	60.7447	24.3886	35.3956	54.1143	2.12447	6.05685	4.24143	14.1078	12.4005	16.4198	11.5329	14.3826	18.7337
sp|Q12335|PST2_YEAST	1	3.92953	2.90401	13.7395	40.6636	58.3511	69.0722	57.693	64.9447	84.409	2.12238	1.06452	3.90007	11.5859	10.8183	12.9619	18.94	18.3205	20.2865
sp|P39079|TCPZ_YEAST	1	3.95293	43.9764	25.8746	28.4957	181.079	71.511	22.1002	25.1843	27.4373	2.10006	15.8564	7.22446	7.98606	33.0225	13.1998	7.13648	6.98801	6.4862
sp|P38212|RCR1_YEAST	1	2.20248	30.3518	14.0505	12.0305	117.296	50.3303	8.1922	7.91556	14.3168	2.0065	18.7666	6.72725	5.78164	36.6808	15.9308	4.53631	3.76634	5.80376
sp|P43603|LSB3_YEAST	1	3.92156	14.6171	14.3538	62.8871	92.7778	90.6181	57.7833	70.0195	103.56	1.66403	4.20957	3.20103	14.0768	13.5137	13.3598	14.9032	15.5179	19.5538
sp|P05756|RS13_YEAST	1	1.49926	21.0618	17.214	44.2231	18.1729	25.9571	32.8637	27.9379	21.04	1.39654	13.3151	8.42709	21.7303	5.81072	8.4007	18.6067	13.592	8.72085
sp|P32803|EMP24_YEAST	1	0	5.96906	7.74979	16.6672	22.3412	30.5721	38.9554	60.0335	70.0187	0	3.33712	3.35507	7.24262	6.31725	8.74985	19.5045	25.8284	25.6651
sp|Q03941|CAB5_YEAST	1	0	1.75859	1.23565	28.2302	25.1646	41.5113	20.0251	32.8756	51.3568	0	1.29746	0.705945	16.1886	9.3902	15.6785	13.2314	18.6656	24.8422
