# Supplementary material for: The peroxisomal exportomer directly inhibits phosphoactivation of the pexophagy receptor Atg36 to suppress pexophagy in yeast
Source: PubMed Central journal article supplement (PMC9000956; doi:10.7554/elife.74531), 2022-04-11

**Figure 2A**

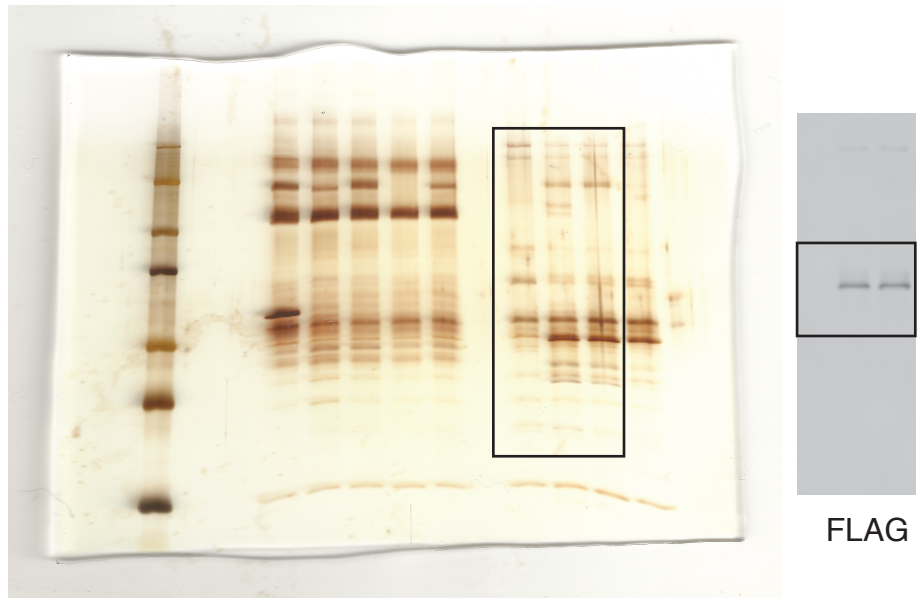

**Figure 2B**

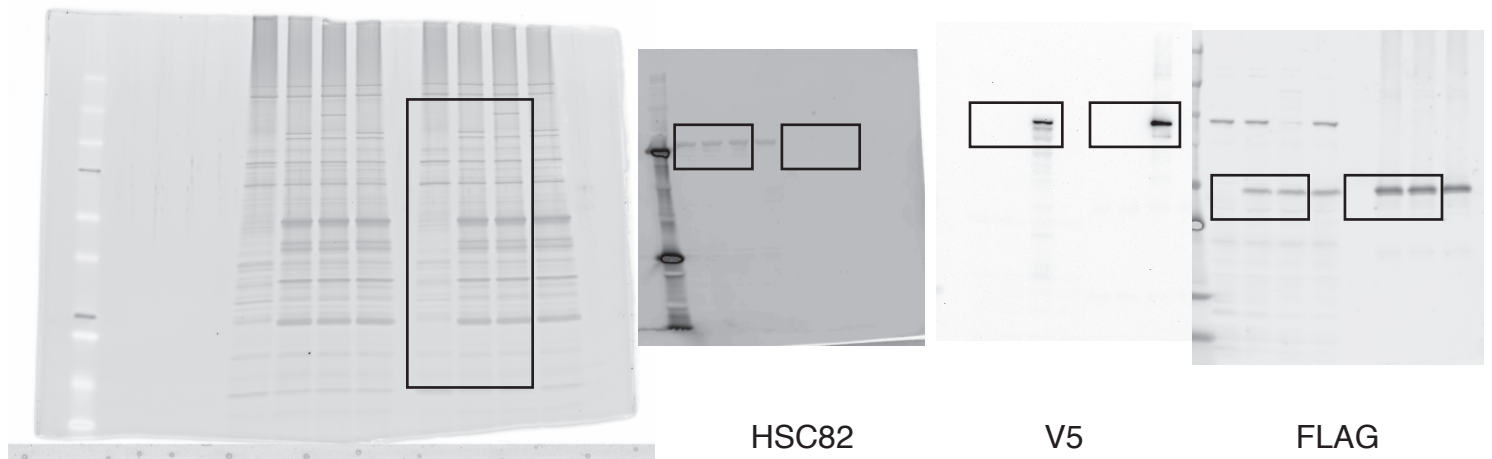

**Figure 2C**

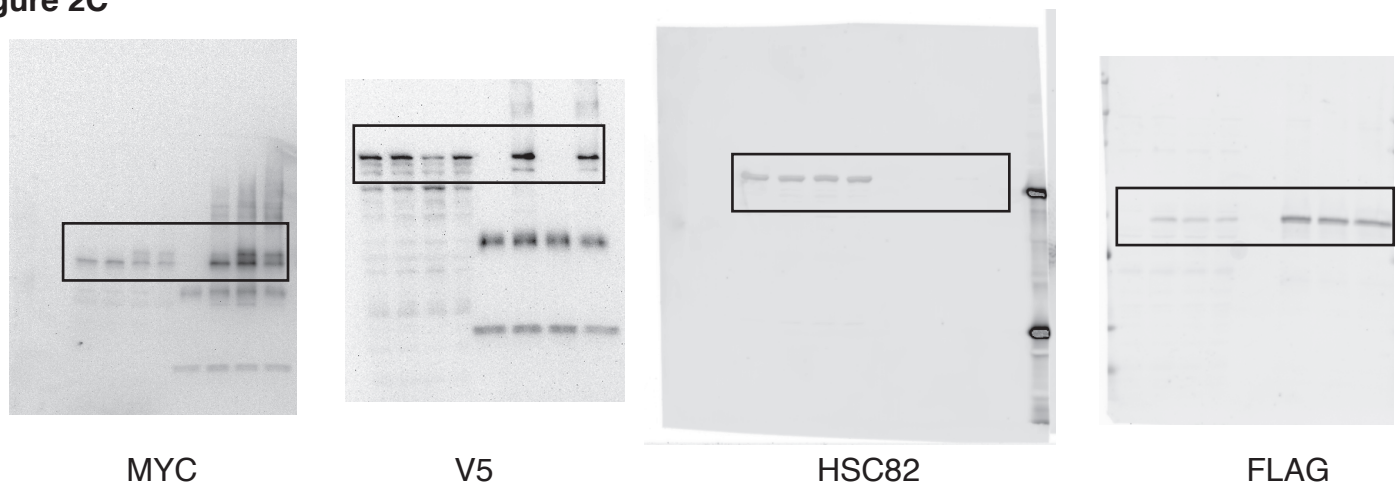

Supplement: elife-74531-fig2-data1.pdf [file elife-74531-fig2-data1.pdf]
