# Supplementary material for: The peroxisomal exportomer directly inhibits phosphoactivation of the pexophagy receptor Atg36 to suppress pexophagy in yeast
Source: PubMed Central journal article supplement (PMC9000956; doi:10.7554/elife.74531), 2022-04-11

Figure 3A

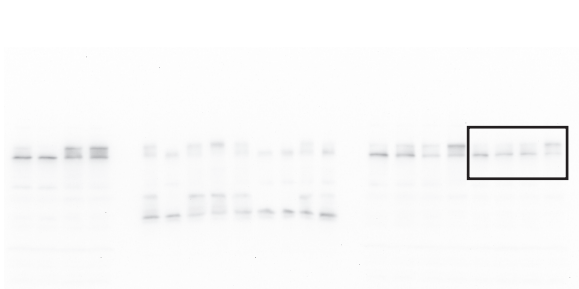

MYC

Figure 3B

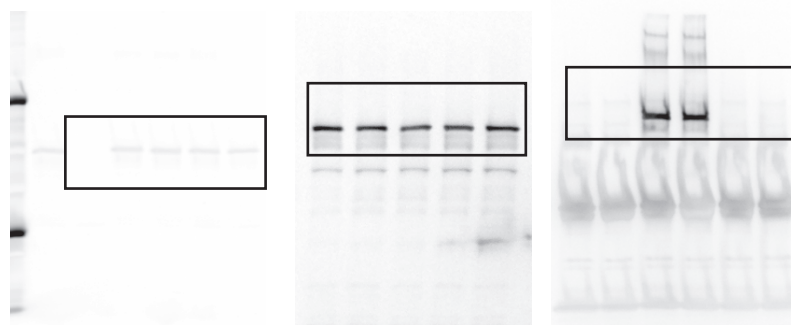

FLAG

V5 (input)

V5 (IP)

Figure 3C

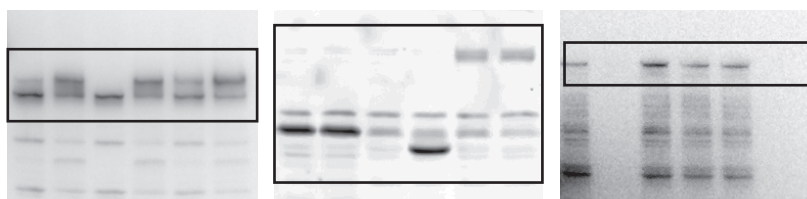

MYC

FLAG

V5

Figure 3E

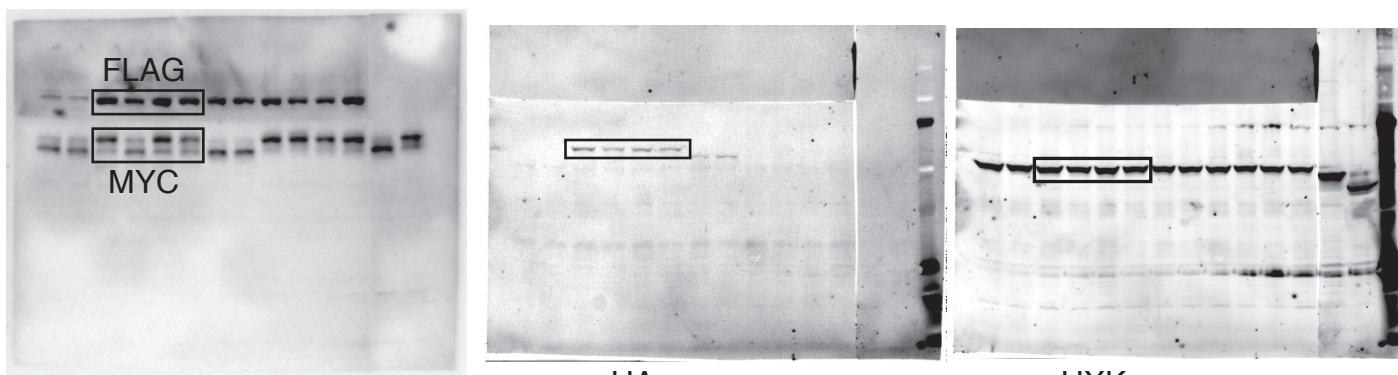

FLAG

MYC

HA

HXK

Figure 3F

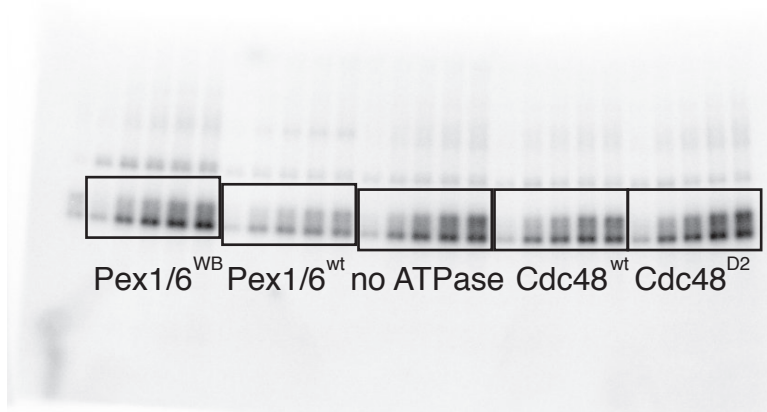

Pex1/6<sup>WB</sup> Pex1/6<sup>wt</sup> no ATPase Cdc48<sup>wt</sup> Cdc48<sup>D2</sup>

Figure 3G

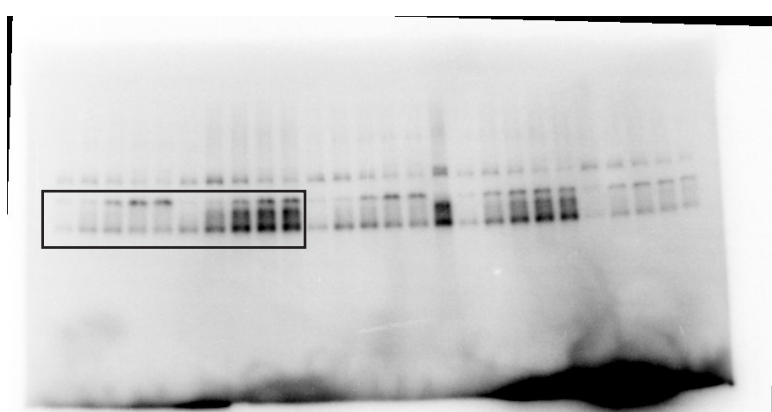

Supplement: elife-74531-fig3-data1.pdf [file elife-74531-fig3-data1.pdf]
