# Supplementary material for: The peroxisomal exportomer directly inhibits phosphoactivation of the pexophagy receptor Atg36 to suppress pexophagy in yeast
Source: eLife journal article supplement (doi:10.7554/elife.74531), 2022-03-09

Figure 1A

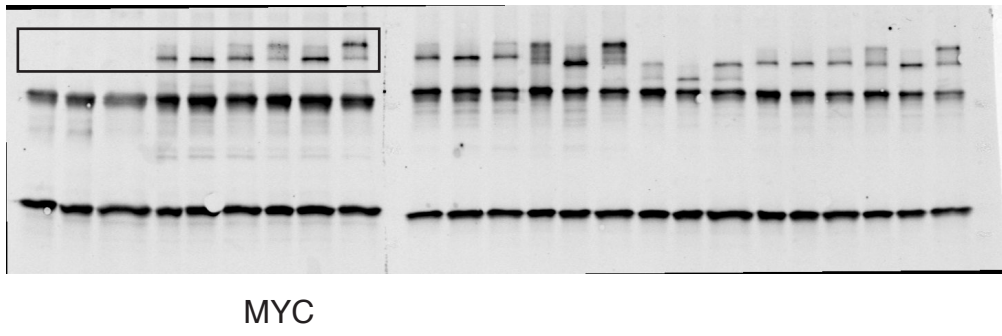

Figure 1B

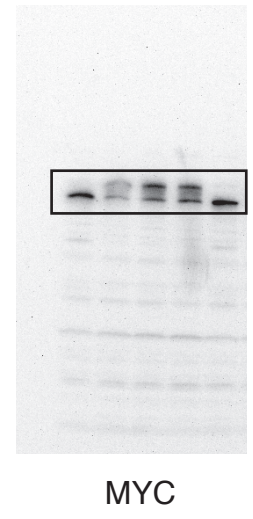

Figure 1C

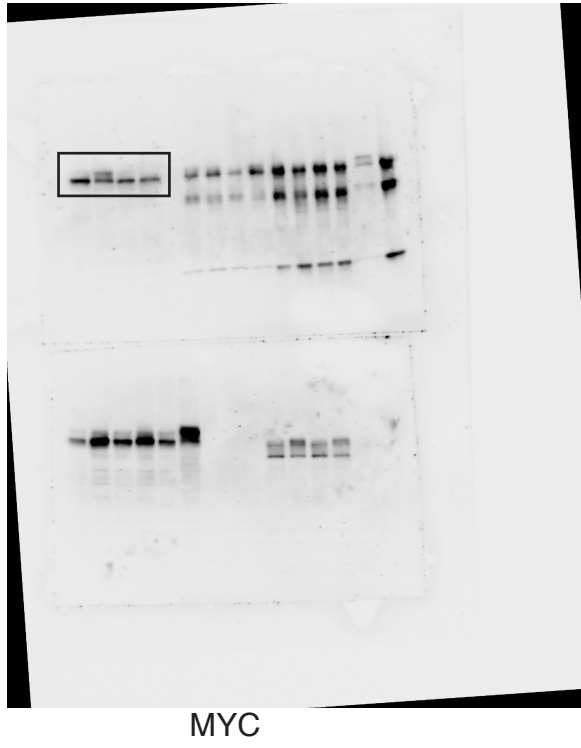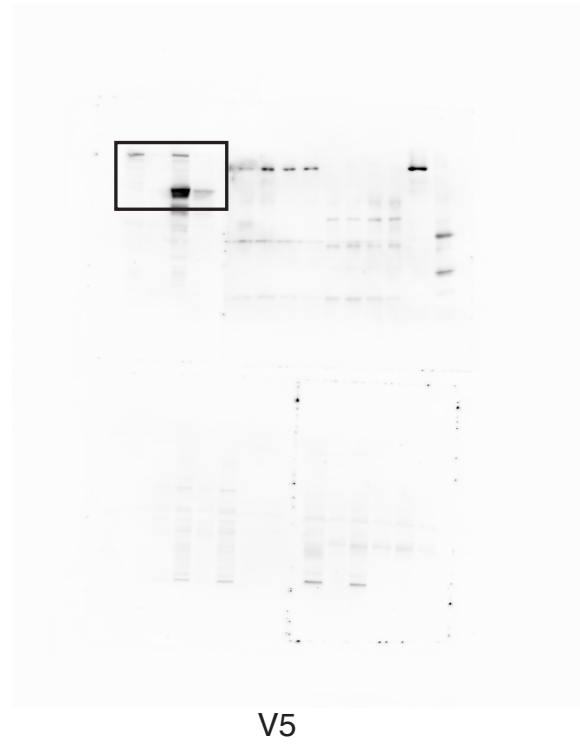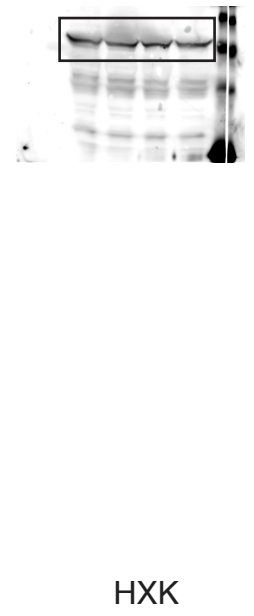

Figure 1D

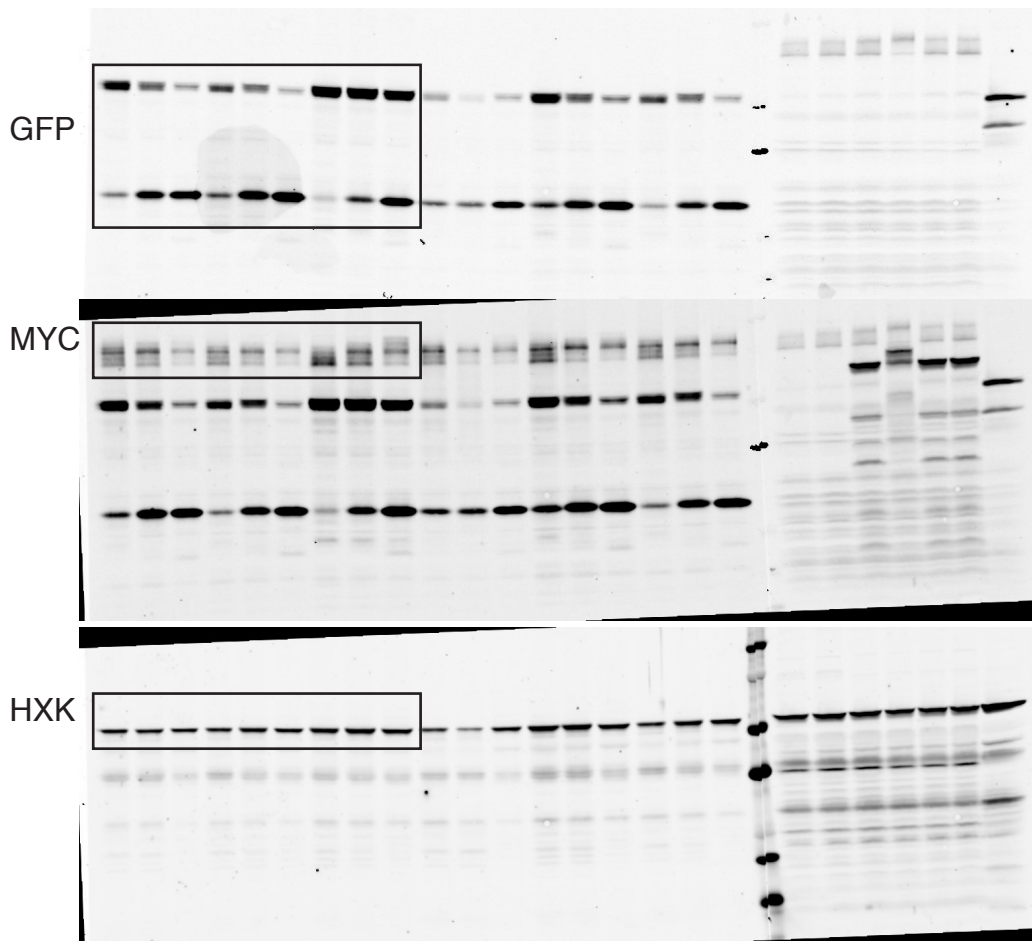

Supplement: fig1-data1 [file elife-74531-fig1-data1-v1.pdf]
