# Supplementary material for: The peroxisomal exportomer directly inhibits phosphoactivation of the pexophagy receptor Atg36 to suppress pexophagy in yeast
Source: eLife journal article supplement (doi:10.7554/elife.74531), 2022-03-09

Figure 4C

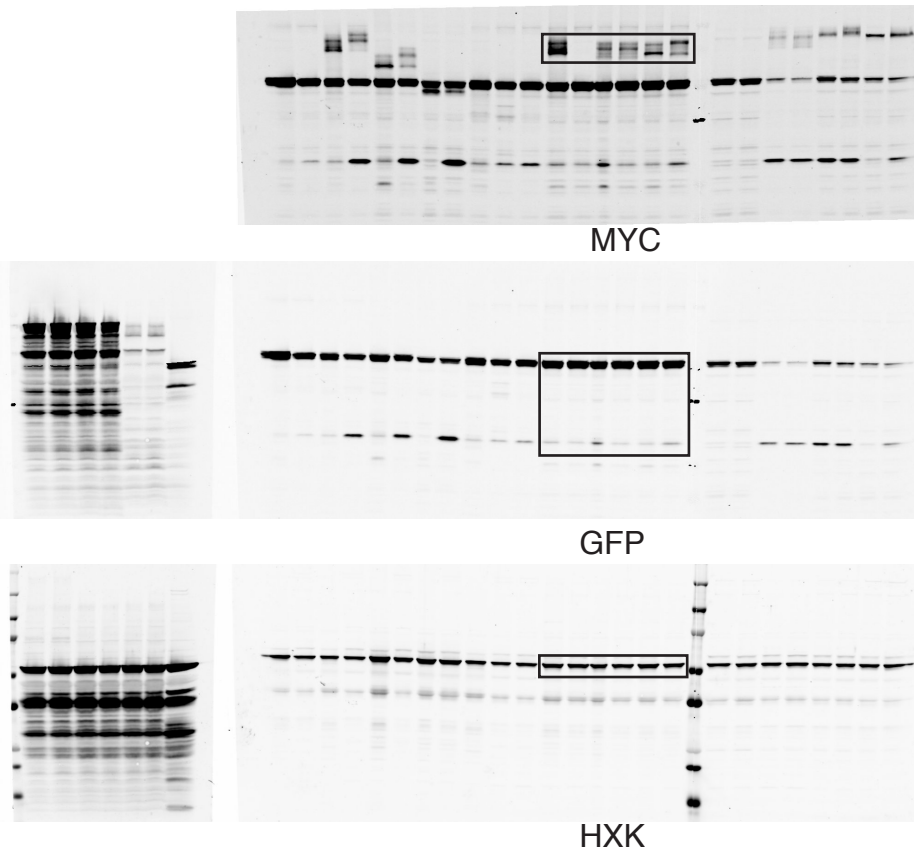

Supplement: fig4-data1 [file elife-74531-fig4-data1-v1.pdf]
