# Supplementary material for: The peroxisomal exportomer directly inhibits phosphoactivation of the pexophagy receptor Atg36 to suppress pexophagy in yeast
Source: eLife. 2022 Apr 11;11:e74531. doi: 10.7554/eLife.74531 (PMC9000956; doi:10.7554/eLife.74531)
Supplement: Figure 2—source data 2. [file elife-74531-fig2-data2.xlsx]

## Sheet: Fig 2D MS data
			% Relative Abundance (SN>=200, IE>=0.5)
Protein Id	Protein description	Quantified peptides	VDY2604-1	VDY2604-2	VDY2604-3	VDY2682-1	VDY2682-2	VDY2682-3	VDY2683-1	VDY2683-2	VDY2683-3
YBL017C	PEP1 SGDID:S000000113, Chr II from 191583-186844, Genome Release 64-1-1, reverse complement, Verified ORF, "Type I transmembrane sorting receptor for multiple vacuolar hydrolases; cycles between the late-Golgi and prevacuolar endosome-like compartments"	13	20.579	17.24	29.8112	7.4273	7.05392	4.76476	4.75042	4.38862	3.44237
YPL112C	PEX25 SGDID:S000006033, Chr XVI from 338620-337436, Genome Release 64-1-1, reverse complement, Verified ORF, "Peripheral peroxisomal membrane peroxin required for the regulation of peroxisome size and maintenance, recruits GTPase Rho1p to peroxisomes, induced by oleate, interacts with homologous protein Pex27p"	13	0.19925	0.23104	0.330052	22.3514	14.9643	17.0187	13.2363	16.4852	14.3838
YBR136W	MEC1 SGDID:S000000340, Chr II from 505668-512774, Genome Release 64-1-1, Verified ORF, "Genome integrity checkpoint protein and PI kinase superfamily member; signal transducer required for cell cycle arrest and transcriptional responses prompted by damaged or unreplicated DNA; monitors and participates in meiotic recombination"	12	34.73	11.3907	35.8169	3.07452	1.43432	2.0057	2.0019	0.911797	1.32158
YDL065C	PEX19 SGDID:S000002223, Chr IV from 337277-336249, Genome Release 64-1-1, reverse complement, Verified ORF, "Chaperone and import receptor for newly-synthesized class I peroxisomal membrane proteins (PMPs), binds PMPs in the cytoplasm and delivers them to the peroxisome for subsequent insertion into the peroxisomal membrane"	11	0.336093	0.439704	0.505797	21.7475	13.9867	20.8896	9.96156	18.6307	13.5024
YMR319C	FET4 SGDID:S000004938, Chr XIII from 914538-912880, Genome Release 64-1-1, reverse complement, Verified ORF, "Low-affinity Fe(II) transporter of the plasma membrane"	10	13.5703	13.3988	19.2121	11.5292	8.96648	8.99668	5.69487	11.7341	3.51637
YAL038W	CDC19 SGDID:S000000036, Chr I from 71786-73288, Genome Release 64-1-1, Verified ORF, "Pyruvate kinase, functions as a homotetramer in glycolysis to convert phosphoenolpyruvate to pyruvate, the input for aerobic (TCA cycle) or anaerobic (glucose fermentation) respiration"	8	4.60798	6.95252	8.02323	14.0532	21.2216	11.0692	9.02129	12.7251	10.8767
YAR007C	RFA1 SGDID:S000000065, Chr I from 158619-156754, Genome Release 64-1-1, reverse complement, Verified ORF, "Subunit of heterotrimeric Replication Protein A (RPA), which is a highly conserved single-stranded DNA binding protein involved in DNA replication, repair, and recombination"	8	35.2595	13.7706	29.3285	3.18088	1.63013	2.14787	1.79069	1.10515	1.0902
YGR192C	TDH3 SGDID:S000003424, Chr VII from 883810-882812, Genome Release 64-1-1, reverse complement, Verified ORF, "Glyceraldehyde-3-phosphate dehydrogenase, isozyme 3, involved in glycolysis and gluconeogenesis; tetramer that catalyzes the reaction of glyceraldehyde-3-phosphate to 1,3 bis-phosphoglycerate; detected in the cytoplasm and cell wall"	8	4.54001	6.80373	8.13243	16.5753	17.8973	13.0185	6.65438	14.8367	5.89794
YML123C	PHO84 SGDID:S000004592, Chr XIII from 25800-24037, Genome Release 64-1-1, reverse complement, Verified ORF, "High-affinity inorganic phosphate (Pi) transporter and low-affinity manganese transporter; regulated by Pho4p and Spt7p; mutation confers resistance to arsenate; exit from the ER during maturation requires Pho86p"	8	17.43	16.7454	21.7642	9.41415	7.78513	6.17611	6.47758	6.84759	5.64499
YOR153W	PDR5 SGDID:S000005679, Chr XV from 619840-624375, Genome Release 64-1-1, Verified ORF, "Plasma membrane ATP-binding cassette (ABC) transporter, multidrug transporter actively regulated by Pdr1p; also involved in steroid transport, cation resistance, and cellular detoxification during exponential growth"	8	13.3712	14.3459	22.5862	9.09646	8.88916	6.22566	6.67409	9.43314	6.08259
YBL030C	PET9 SGDID:S000000126, Chr II from 163997-163041, Genome Release 64-1-1, reverse complement, Verified ORF, "Major ADP/ATP carrier of the mitochondrial inner membrane, exchanges cytosolic ADP for mitochondrially synthesized ATP; also imports heme and ATP; phosphorylated; required for viability in many lab strains that carry a sal1 mutation"	7	5.88422	3.60635	8.39153	15.7565	12.2578	14.8095	10.4997	13.2465	10.4254
YBL098W	BNA4 SGDID:S000000194, Chr II from 39145-40527, Genome Release 64-1-1, Verified ORF, "Kynurenine 3-mono oxygenase, required for the de novo biosynthesis of NAD from tryptophan via kynurenine; expression regulated by Hst1p; putative therapeutic target for Huntington disease"	7	0.274949	0.681126	0.579516	25.8593	15.8417	18.9997	12.0727	12.4962	10.4005
YHR111W	UBA4 SGDID:S000001153, Chr VIII from 333072-334394, Genome Release 64-1-1, Verified ORF, "Protein that activates Urm1p before its conjugation to proteins (urmylation); also acts in thiolation of the wobble base of cytoplasmic tRNAs by adenylating and then thiolating Urm1p; receives sulfur from Tum1p"	7	22.7579	10.8309	30.6776	6.52305	6.50556	6.52558	4.06985	4.06548	8.04405
YMR054W	STV1 SGDID:S000004658, Chr XIII from 383303-385975, Genome Release 64-1-1, Verified ORF, "Subunit a of the vacuolar-ATPase V0 domain, one of two isoforms (Stv1p and Vph1p); Stv1p is located in V-ATPase complexes of the Golgi and endosomes while Vph1p is located in V-ATPase complexes of the vacuole"	7	19.049	16.5412	22.7668	7.35118	6.84673	4.90941	6.92888	6.13774	3.37212
YAL005C	SSA1 SGDID:S000000004, Chr I from 141431-139503, Genome Release 64-1-1, reverse complement, Verified ORF, "ATPase involved in protein folding and nuclear localization signal (NLS)-directed nuclear transport; member of heat shock protein 70 (HSP70) family; forms a chaperone complex with Ydj1p; localized to the nucleus, cytoplasm, and cell wall; 98% identical with Ssa2p, but subtle differences betw…	6	4.04199	4.20406	5.1502	10.2137	14.1761	9.00374	6.62101	10.5686	7.64248
YGR032W	GSC2 SGDID:S000003264, Chr VII from 548264-553951, Genome Release 64-1-1, Verified ORF, "Catalytic subunit of 1,3-beta-glucan synthase, involved in formation of the inner layer of the spore wall; activity positively regulated by Rho1p and negatively by Smk1p; has similarity to an alternate catalytic subunit, Fks1p (Gsc1p)"	6	17.9313	13.9351	23.948	9.90526	8.56353	6.10827	7.70372	6.63205	5.27241
YBR080C	SEC18 SGDID:S000000284, Chr II from 400890-398614, Genome Release 64-1-1, reverse complement, Verified ORF, "ATPase required for vesicular transport between ER and Golgi, the 'priming' step in homotypic vacuole fusion, autophagy, and protein secretion; releases Sec17p from SNAP complexes; has similarity to mammalian NSF"	5	16.9796	16.1589	24.468	9.16037	7.53571	6.37024	5.61144	7.15827	6.0811
YBR118W	TEF2 SGDID:S000000322, Chr II from 477671-479047, Genome Release 64-1-1, Verified ORF, "Translational elongation factor EF-1 alpha; also encoded by TEF1; functions in the binding reaction of aminoacyl-tRNA (AA-tRNA) to ribosomes; may also have a role in tRNA re-export from the nucleus"	5	5.00618	5.93498	7.96048	14.0864	19.709	11.2812	10.0557	11.4271	11.3997
YDR329C	PEX3 SGDID:S000002737, Chr IV from 1127595-1126270, Genome Release 64-1-1, reverse complement, Verified ORF, "Peroxisomal membrane protein (PMP) required for proper localization and stability of PMPs; anchors peroxisome retention factor Inp1p at the peroxisomal membrane; interacts with Pex19p"	5	0.194582	0.0828423	0.577558	22.6358	14.7444	15.3573	11.5368	19.573	15.2977
YER078C	ICP55 SGDID:S000000880, Chr V from 318342-316807, Genome Release 64-1-1, reverse complement, Verified ORF, "Mitochondrial aminopeptidase; cleaves the N termini of at least 38 imported proteins after cleavage by the mitochondrial processing peptidase (MPP), thereby increasing their stability; member of the aminopeptidase P family"	5	8.10281	5.56519	9.29578	21.9141	13.5103	12.4621	8.85398	10.9947	9.301
YGR254W	ENO1 SGDID:S000003486, Chr VII from 1000927-1002240, Genome Release 64-1-1, Verified ORF, "Enolase I, a phosphopyruvate hydratase that catalyzes the conversion of 2-phosphoglycerate to phosphoenolpyruvate during glycolysis and the reverse reaction during gluconeogenesis; expression is repressed in response to glucose"	5	6.3952	8.0515	9.82491	14.1202	18.7578	9.85662	6.9369	11.0354	8.86251
YJL172W	CPS1 SGDID:S000003708, Chr X from 97737-99467, Genome Release 64-1-1, Verified ORF, "Vacuolar carboxypeptidase yscS; expression is induced under low-nitrogen conditions"	5	16.8728	17.9758	23.7178	7.74628	6.80093	5.26202	6.10651	7.85653	5.16072
YKL150W	MCR1 SGDID:S000001633, Chr XI from 166544-167452, Genome Release 64-1-1, Verified ORF, "Mitochondrial NADH-cytochrome b5 reductase, involved in ergosterol biosynthesis"	5	1.10877	1.01126	2.0979	20.4399	14.5886	16.8171	13.708	13.4732	11.395
YLR044C	PDC1 SGDID:S000004034, Chr XII from 234081-232390, Genome Release 64-1-1, reverse complement, Verified ORF, "Major of three pyruvate decarboxylase isozymes, key enzyme in alcoholic fermentation, decarboxylates pyruvate to acetaldehyde; subject to glucose-, ethanol-, and autoregulation; involved in amino acid catabolism"	5	4.27858	6.13886	6.94181	16.9337	20.8827	11.0239	8.72357	13.1994	8.35115
YOL147C	PEX11 SGDID:S000005507, Chr XV from 48643-47933, Genome Release 64-1-1, reverse complement, Verified ORF, "Peroxisomal membrane protein required for medium-chain fatty acid oxidation and peroxisome proliferation, possibly by inducing membrane curvature; localization regulated by phosphorylation; transcription regulated by Adr1p and Pip2p-Oaf1p"	5	0.146859	0.117235	0.456317	21.685	15.3658	13.4926	12.5951	16.8413	17.5393
YOR176W	HEM15 SGDID:S000005702, Chr XV from 662401-663582, Genome Release 64-1-1, Verified ORF, "Ferrochelatase, a mitochondrial inner membrane protein, catalyzes the insertion of ferrous iron into protoporphyrin IX, the eighth and final step in the heme biosynthetic pathway"	5	0.41042	0.109145	0.0450452	19.8072	15.5104	13.0546	10.4088	17.1889	21.3651
YPL265W	DIP5 SGDID:S000006186, Chr XVI from 41043-42869, Genome Release 64-1-1, Verified ORF, "Dicarboxylic amino acid permease, mediates high-affinity and high-capacity transport of L-glutamate and L-aspartate; also a transporter for Gln, Asn, Ser, Ala, and Gly"	5	15.0985	15.0209	20.3615	7.63377	7.07165	6.3524	6.76231	6.51175	5.66242
YAL055W	PEX22 SGDID:S000000051, Chr I from 42177-42719, Genome Release 64-1-1, Verified ORF, "Putative peroxisomal membrane protein required for import of peroxisomal proteins, functionally complements a Pichia pastoris pex22 mutation"	4	0.334504	0.503445	0.402837	20.1807	15.492	18.0999	12.7724	16.8121	15.4021
YCR012W	PGK1 SGDID:S000000605, Chr III from 137746-138996, Genome Release 64-1-1, Verified ORF, "3-phosphoglycerate kinase, catalyzes transfer of high-energy phosphoryl groups from the acyl phosphate of 1,3-bisphosphoglycerate to ADP to produce ATP; key enzyme in glycolysis and gluconeogenesis"	4	6.45419	9.57056	11.9132	14.2758	17.0573	10.4688	8.39235	12.0433	9.82447
YDL229W	SSB1 SGDID:S000002388, Chr IV from 44065-45906, Genome Release 64-1-1, Verified ORF, "Cytoplasmic ATPase that is a ribosome-associated molecular chaperone, functions with J-protein partner Zuo1p; may be involved in folding of newly-made polypeptide chains; member of the HSP70 family; interacts with phosphatase subunit Reg1p"	4	6.21154	6.73238	8.92323	13.3775	21.774	11.2052	7.53716	12.6617	10.3892
YDR038C	ENA5 SGDID:S000002445, Chr IV from 530697-527422, Genome Release 64-1-1, reverse complement, Verified ORF, "Protein with similarity to P-type ATPase sodium pumps, member of the Na+ efflux ATPase family"	4	14.952	15.2634	23.8913	9.19681	8.4897	6.66427	6.67756	8.45143	6.41348
YDR244W	PEX5 SGDID:S000002652, Chr IV from 950563-952401, Genome Release 64-1-1, Verified ORF, "Peroxisomal membrane signal receptor for the C-terminal tripeptide signal sequence (PTS1) of peroxisomal matrix proteins, required for peroxisomal matrix protein import; also proposed to have PTS1-receptor independent functions"	4	1.60366	1.93607	3.3631	16.0622	13.2999	13.3088	10.0057	18.9643	12.5544
YDR385W	EFT2 SGDID:S000002793, Chr IV from 1243230-1245758, Genome Release 64-1-1, Verified ORF, "Elongation factor 2 (EF-2), also encoded by EFT1; catalyzes ribosomal translocation during protein synthesis; contains diphthamide, the unique posttranslationally modified histidine residue specifically ADP-ribosylated by diphtheria toxin"	4	4.54217	5.11464	7.87249	17.1607	21.8637	12.062	9.67052	11.8441	9.86969
YDR508C	GNP1 SGDID:S000002916, Chr IV from 1468444-1466453, Genome Release 64-1-1, reverse complement, Verified ORF, "High-affinity glutamine permease, also transports Leu, Ser, Thr, Cys, Met and Asn; expression is fully dependent on Grr1p and modulated by the Ssy1p-Ptr3p-Ssy5p (SPS) sensor of extracellular amino acids"	4	15.455	15.7052	24.5561	9.35888	7.60705	6.54239	6.43962	7.48029	4.32605
YER056C	FCY2 SGDID:S000000858, Chr V from 268113-266512, Genome Release 64-1-1, reverse complement, Verified ORF, "Purine-cytosine permease, mediates purine (adenine, guanine, and hypoxanthine) and cytosine accumulation"	4	13.7692	16.2689	19.7556	11.7775	10.6782	7.4887	5.20052	8.66398	5.98917
YER178W	PDA1 SGDID:S000000980, Chr V from 546817-548079, Genome Release 64-1-1, Verified ORF, "E1 alpha subunit of the pyruvate dehydrogenase (PDH) complex, catalyzes the direct oxidative decarboxylation of pyruvate to acetyl-CoA; phosphorylated; regulated by glucose"	4	6.5233	4.60968	5.97646	11.3796	11.3431	11.5543	12.4605	14.0339	13.8611
YGL153W	PEX14 SGDID:S000003121, Chr VII from 216273-217298, Genome Release 64-1-1, Verified ORF, "Peroxisomal membrane peroxin that is a central component of the peroxisomal protein import machinery; interacts with both PTS1 (Pex5p) and PTS2 (Pex7p), peroxisomal matrix protein signal recognition factors and membrane receptor Pex13p"	4	0.693242	0.648486	1.09415	19.8872	11.9204	16.9916	10.1875	18.2225	20.3549
YJL185C	YJL185C SGDID:S000003721, Chr X from 82976-82095, Genome Release 64-1-1, reverse complement, Uncharacterized ORF, "Putative protein of unknown function; mRNA is weakly cell cycle regulated, peaking in G2 phase; YJL185C is a non-essential gene"	4	0.126148	0.208723	0.27074	20.7807	18.0709	16.5823	10.937	15.8427	17.1808
YKR035W-A	DID2 SGDID:S000006435, Chr XI from 507939-508553, Genome Release 64-1-1, Verified ORF, "Class E protein of the vacuolar protein-sorting (Vps) pathway; binds Vps4p and directs it to dissociate ESCRT-III complexes; forms a functional and physical complex with Ist1p; human ortholog may be altered in breast tumors"	4	17.7743	20.0306	27.8855	5.58461	6.12734	4.0646	5.21401	6.4432	3.87006
YLR191W	PEX13 SGDID:S000004181, Chr XII from 537272-538432, Genome Release 64-1-1, Verified ORF, "Integral peroxisomal membrane protein required for translocation of peroxisomal matrix proteins, interacts with the PTS1 signal recognition factor Pex5p and the PTS2 signal recognition factor Pex7p, forms a complex with Pex14p and Pex17p"	4	0.248029	0.189456	0.417909	21.3475	9.01882	15.7572	13.9195	16.0124	13.2742
YLR342W	FKS1 SGDID:S000004334, Chr XII from 809997-815627, Genome Release 64-1-1, Verified ORF, "Catalytic subunit of 1,3-beta-D-glucan synthase, functionally redundant with alternate catalytic subunit Gsc2p; binds to regulatory subunit Rho1p; involved in cell wall synthesis and maintenance; localizes to sites of cell wall remodeling"	4	17.8361	15.1303	27.6978	8.47615	8.26047	5.21675	5.63101	6.95825	4.79329
YNL055C	POR1 SGDID:S000005000, Chr XIV from 518845-517994, Genome Release 64-1-1, reverse complement, Verified ORF, "Mitochondrial porin (voltage-dependent anion channel), outer membrane protein required for the maintenance of mitochondrial osmotic stability and mitochondrial membrane permeability; phosphorylated"	4	1.607	1.04336	2.52594	12.6901	10.0925	13.0347	14.7961	19.158	10.6916
YNL121C	TOM70 SGDID:S000005065, Chr XIV from 400537-398684, Genome Release 64-1-1, reverse complement, Verified ORF, "Component of the TOM (translocase of outer membrane) complex responsible for recognition and initial import steps for all mitochondrially directed proteins; acts as a receptor for incoming precursor proteins"	4	2.45909	1.81287	3.47681	15.6455	10.1759	13.8752	12.7782	19.6533	12.9192
YNL214W	PEX17 SGDID:S000005158, Chr XIV from 245617-246216, Genome Release 64-1-1, Verified ORF, "Peroxisomal membrane peroxin and subunit of the docking complex that facilitates the import of peroxisomal matrix proteins; required for peroxisome biogenesis"	4	0.503067	0.872708	0.886571	21.3877	13.841	17.9653	13.0924	17.1069	14.3444
YNL329C	PEX6 SGDID:S000005273, Chr XIV from 22633-19541, Genome Release 64-1-1, reverse complement, Verified ORF, "AAA-peroxin that heterodimerizes with AAA-peroxin Pex1p and participates in the recycling of peroxisomal signal receptor Pex5p from the peroxisomal membrane to the cystosol"	4	0.611098	0.702186	0.431269	34.3153	24.7528	27.2774	2.2436	2.69603	1.97865
YOR270C	VPH1 SGDID:S000005796, Chr XV from 830574-828052, Genome Release 64-1-1, reverse complement, Verified ORF, "Subunit a of vacuolar-ATPase V0 domain, one of two isoforms (Vph1p and Stv1p); Vph1p is located in V-ATPase complexes of the vacuole while Stv1p is located in V-ATPase complexes of the Golgi and endosomes"	4	15.6546	17.1178	27.6967	6.95076	7.2019	4.44992	5.45315	5.5808	4.07035
YAL014C	SYN8 SGDID:S000000012, Chr I from 129019-128252, Genome Release 64-1-1, reverse complement, Verified ORF, "Endosomal SNARE related to mammalian syntaxin 8"	3	17.6597	20.0001	26.6395	6.47076	5.38928	4.41821	4.85163	6.55271	5.23233
YBL042C	FUI1 SGDID:S000000138, Chr II from 140260-138341, Genome Release 64-1-1, reverse complement, Verified ORF, "High affinity uridine permease, localizes to the plasma membrane; also mediates low but significant transport of the cytotoxic nucleoside analog 5-fluorouridine; not involved in uracil transport"	3	14.9199	16.5783	23.8767	10.0765	8.37346	7.45972	5.48728	8.29013	4.93805
YFL038C	YPT1 SGDID:S000001856, Chr VI from 55986-55366, Genome Release 64-1-1, reverse complement, Verified ORF, "Rab family GTPase, involved in the ER-to-Golgi step of the secretory pathway; complex formation with the Rab escort protein Mrs6p is required for prenylation of Ypt1p by protein geranylgeranyltransferase type II (Bet2p-Bet4p)"	3	10.0694	10.4905	12.0895	17.3207	12.7788	12.4908	7.53277	11.178	6.04946
YFL039C	ACT1 SGDID:S000001855, Chr VI from 54377-53260,54696-54687, Genome Release 64-1-1, reverse complement, Verified ORF, "Actin, structural protein involved in cell polarization, endocytosis, and other cytoskeletal functions"	3	4.89405	4.10548	3.44759	3.34973	5.40018	4.93022	8.97117	7.97333	9.60334
YGR231C	PHB2 SGDID:S000003463, Chr VII from 953480-952548, Genome Release 64-1-1, reverse complement, Verified ORF, "Subunit of the prohibitin complex (Phb1p-Phb2p), a 1.2 MDa ring-shaped inner mitochondrial membrane chaperone that stabilizes newly synthesized proteins; determinant of replicative life span; involved in mitochondrial segregation"	3	7.32012	3.99328	12.2989	14.4465	12.2035	13.5331	10.8518	15.3553	9.99749
YJL212C	OPT1 SGDID:S000003748, Chr X from 36249-33850, Genome Release 64-1-1, reverse complement, Verified ORF, "Proton-coupled oligopeptide transporter of the plasma membrane; also transports glutathione and phytochelatin; member of the OPT family"	3	14.0091	15.6662	24.4532	9.51032	8.0983	7.73733	6.64205	6.39597	7.4875
YKL041W	VPS24 SGDID:S000001524, Chr XI from 360143-360817, Genome Release 64-1-1, Verified ORF, "One of four subunits of the endosomal sorting complex required for transport III (ESCRT-III); forms an ESCRT-III subcomplex with Did4p; involved in the sorting of transmembrane proteins into the multivesicular body (MVB) pathway"	3	17.7346	20.7326	28.0447	6.13182	6.93855	4.95493	5.3669	6.45071	3.64514
YKR093W	PTR2 SGDID:S000001801, Chr XI from 615730-617535, Genome Release 64-1-1, Verified ORF, "Integral membrane peptide transporter, mediates transport of di- and tri-peptides; conserved protein that contains 12 transmembrane domains; PTR2 expression is regulated by the N-end rule pathway via repression by Cup9p"	3	15.6291	16.3778	20.3699	11.6285	7.3118	7.04204	5.74228	6.81918	5.20497
YMR186W	HSC82 SGDID:S000004798, Chr XIII from 632355-634472, Genome Release 64-1-1, Verified ORF, "Cytoplasmic chaperone of the Hsp90 family, redundant in function and nearly identical with Hsp82p, and together they are essential; expressed constitutively at 10-fold higher basal levels than HSP82 and induced 2-3 fold by heat shock"	3	3.53758	5.05285	6.80371	14.2138	21.7953	11.2108	9.88313	14.484	13.0188
YMR197C	VTI1 SGDID:S000004810, Chr XIII from 659198-658545, Genome Release 64-1-1, reverse complement, Verified ORF, "Protein involved in cis-Golgi membrane traffic; v-SNARE that interacts with two t-SNARES, Sed5p and Pep12p; required for multiple vacuolar sorting pathways"	3	17.4616	20.3892	27.4853	6.7526	7.3273	5.45313	5.0979	6.07082	3.34763
YNL065W	AQR1 SGDID:S000005009, Chr XIV from 503724-505484, Genome Release 64-1-1, Verified ORF, "Plasma membrane multidrug transporter of the major facilitator superfamily, confers resistance to short-chain monocarboxylic acids and quinidine; involved in the excretion of excess amino acids"	3	13.9531	14.2023	19.9199	10.5959	9.17008	6.6666	6.2834	8.0218	5.68256
YOL044W	PEX15 SGDID:S000005404, Chr XV from 247150-248301, Genome Release 64-1-1, Verified ORF, "Phosphorylated tail-anchored type II integral peroxisomal membrane protein required for peroxisome biogenesis, cells lacking Pex15p mislocalize peroxisomal matrix proteins to cytosol, overexpression results in impaired peroxisome assembly"	3	0.438302	0.250709	0.99681	27.115	18.9793	21.1131	9.56052	12.9753	8.57094
YOL086C	ADH1 SGDID:S000005446, Chr XV from 160594-159548, Genome Release 64-1-1, reverse complement, Verified ORF, "Alcohol dehydrogenase, fermentative isozyme active as homo- or heterotetramers; required for the reduction of acetaldehyde to ethanol, the last step in the glycolytic pathway"	3	5.27507	7.10363	7.52285	16.9041	18.1549	11.3972	8.08657	12.4288	13.127
YOR011W	AUS1 SGDID:S000005537, Chr XV from 349679-353863, Genome Release 64-1-1, Verified ORF, "Plasma membrane sterol transporter of the ATP-binding cassette family; required, along with Pdr11p, for uptake of exogenous sterols and their incorporation into the plasma membrane; activity is stimulated by phosphatidylserine; sterol uptake is required for anaerobic growth because sterol biosynthesis requires…	3	7.89131	6.43201	9.94329	14.5532	13.0542	8.99055	11.4726	14.3239	13.3389
YOR271C	FSF1 SGDID:S000005797, Chr XV from 832042-831059, Genome Release 64-1-1, reverse complement, Uncharacterized ORF, "Putative protein, predicted to be an alpha-isopropylmalate carrier; belongs to the sideroblastic-associated protein family; non-tagged protein is detected in purified mitochondria; likely to play a role in iron homeostasis"	3	1.32552	0.562553	1.88342	8.41034	5.4417	7.48977	4.0959	6.78213	2.83413
YPR128C	ANT1 SGDID:S000006332, Chr XVI from 792204-791218, Genome Release 64-1-1, reverse complement, Verified ORF, "Peroxisomal adenine nucleotide transporter; involved in beta-oxidation of medium-chain fatty acid; required for peroxisome proliferation"	3	0	0.0497889	0.14438	26.4675	16.6099	17.2443	12.9014	16.2115	10.3713
YAR010C	YAR010C SGDID:S000000068, Chr I from 165866-164544, Genome Release 64-1-1, reverse complement, transposable_element_gene, "Retrotransposon TYA Gag gene co-transcribed with TYB Pol; in YARCTY1-1 TYB is mutant and probably non-functional"	2	25.9875	14.6897	23.3452	6.62337	6.9406	3.68632	4.25767	3.87944	2.7985
YBL027W	RPL19B SGDID:S000000123, Chr II from 168423-168424,168809-169376, Genome Release 64-1-1, Verified ORF, "Protein component of the large (60S) ribosomal subunit, nearly identical to Rpl19Ap and has similarity to rat L19 ribosomal protein; rpl19a and rpl19b single null mutations result in slow growth, while the double null mutation is lethal"	2	0.461306	0.847555	0.931547	16.9096	28.8959	14.5447	7.06898	8.30302	4.70544
YBL099W	ATP1 SGDID:S000000195, Chr II from 37053-38690, Genome Release 64-1-1, Verified ORF, "Alpha subunit of the F1 sector of mitochondrial F1F0 ATP synthase, which is a large, evolutionarily conserved enzyme complex required for ATP synthesis; phosphorylated"	2	6.01729	5.70315	6.43597	5.41679	8.51683	7.09933	5.25321	6.97493	12.984
YBR286W	APE3 SGDID:S000000490, Chr II from 774700-776313, Genome Release 64-1-1, Verified ORF, "Vacuolar aminopeptidase Y, processed to mature form by Prb1p"	2	20.694	18.0511	26.3416	6.48394	6.60364	4.34388	5.1401	6.37834	5.96341
YDL055C	PSA1 SGDID:S000002213, Chr IV from 356759-355674, Genome Release 64-1-1, reverse complement, Verified ORF, "GDP-mannose pyrophosphorylase (mannose-1-phosphate guanyltransferase), synthesizes GDP-mannose from GTP and mannose-1-phosphate in cell wall biosynthesis; required for normal cell wall structure"	2	6.05653	7.08199	8.82412	14.2698	18.3148	12.716	9.82374	11.477	11.4361
YDL185W	VMA1 SGDID:S000002344, Chr IV from 126787-130002, Genome Release 64-1-1, Verified ORF, "Subunit A of the eight-subunit V1 peripheral membrane domain of the vacuolar H+-ATPase; protein precursor undergoes self-catalyzed splicing to yield the extein Tfp1p and the intein Vde (PI-SceI), which is a site-specific endonuclease"	2	4.46145	7.00079	11.9172	8.31947	23.7792	10.4216	9.61938	14.1605	5.30081
YDR345C	HXT3 SGDID:S000002753, Chr IV from 1164660-1162957, Genome Release 64-1-1, reverse complement, Verified ORF, "Low affinity glucose transporter of the major facilitator superfamily, expression is induced in low or high glucose conditions"	2	6.97226	3.58026	2.85554	2.44479	2.76178	4.73071	25.9616	4.67876	6.9878
YDR483W	KRE2 SGDID:S000002891, Chr IV from 1421157-1422485, Genome Release 64-1-1, Verified ORF, "Alpha1,2-mannosyltransferase of the Golgi involved in protein mannosylation"	2	14.6909	18.6093	24.6114	9.10627	9.21712	6.82984	3.86593	6.86199	1.8303
YDR499W	LCD1 SGDID:S000002907, Chr IV from 1447830-1450073, Genome Release 64-1-1, Verified ORF, "Essential protein required for the DNA integrity checkpoint pathways; interacts physically with Mec1p; putative homolog of S. pombe Rad26 and human ATRIP"	2	38.5533	16.8438	31.8912	3.58591	0.984104	1.79284	1.78532	0.850116	1.15355
YGL189C	RPS26A SGDID:S000003157, Chr VII from 148588-148229, Genome Release 64-1-1, reverse complement, Verified ORF, "Protein component of the small (40S) ribosomal subunit; nearly identical to Rps26Bp and has similarity to rat S26 ribosomal protein"	2	2.89978	3.95193	4.27836	18.0569	28.7422	17.808	9.56218	10.9137	3.78703
YHL001W	RPL14B SGDID:S000000993, Chr VIII from 104277-104405,104804-105091, Genome Release 64-1-1, Verified ORF, "Protein component of the large (60S) ribosomal subunit, nearly identical to Rpl14Ap and has similarity to rat L14 ribosomal protein"	2	1.5322	2.1043	2.31588	14.4913	42.2359	10.6613	7.11082	10.1114	9.43696
YKL197C	PEX1 SGDID:S000001680, Chr XI from 73865-70734, Genome Release 64-1-1, reverse complement, Verified ORF, "AAA-peroxin that heterodimerizes with AAA-peroxin Pex6p and participates in the recycling of peroxisomal signal receptor Pex5p from the peroxisomal membrane to the cystosol; induced by oleic acid and upregulated during anaerobiosis"	2	0.240639	0.661135	0.464587	42.7814	25.9847	28.7874	0.54073	0.263908	0.275563
YLR167W	RPS31 SGDID:S000004157, Chr XII from 498947-499405, Genome Release 64-1-1, Verified ORF, "Fusion protein that is cleaved to yield a ribosomal protein of the small (40S) subunit and ubiquitin; ubiquitin may facilitate assembly of the ribosomal protein into ribosomes; interacts genetically with translation factor eIF2B"	2	10.2863	8.50399	13.8182	9.80529	11.2828	7.70128	8.86695	10.1123	10.53
YLR241W	YLR241W SGDID:S000004231, Chr XII from 620473-622821, Genome Release 64-1-1, Uncharacterized ORF, "Putative protein of unknown function, may be involved in detoxification"	2	15.4625	19.3425	23.6197	7.30648	5.67967	4.61323	4.28039	4.57607	2.9009
YML063W	RPS1B SGDID:S000004528, Chr XIII from 146482-147249, Genome Release 64-1-1, Verified ORF, "Ribosomal protein 10 (rp10) of the small (40S) subunit; nearly identical to Rps1Ap and has similarity to rat S3a ribosomal protein"	2	1.78227	1.56201	2.64657	17.554	31.2845	19.2213	8.33719	10.5916	7.02059
YMR026C	PEX12 SGDID:S000004628, Chr XIII from 325435-324236, Genome Release 64-1-1, reverse complement, Verified ORF, "C3HC4-type RING-finger peroxin and E3 ubiquitin ligase, required for peroxisome biogenesis and peroxisomal matrix protein import; forms translocation subcomplex with Pex2p and Pex10p; mutations in human homolog cause peroxisomal disorder"	2	0	0	0.0130558	21.8775	16.1883	19.9979	11.392	15.8124	14.7188
YMR204C	INP1 SGDID:S000004817, Chr XIII from 671325-670063, Genome Release 64-1-1, reverse complement, Verified ORF, "Peripheral membrane protein of peroxisomes involved in peroxisomal inheritance; recruitment to peroxisomes is mediated by interaction with Pex3p at the peroxisomal membrane"	2	0.877344	1.25037	1.14843	23.9306	13.7496	20.6031	13.5463	13.4289	11.4653
YNL178W	RPS3 SGDID:S000005122, Chr XIV from 302680-303402, Genome Release 64-1-1, Verified ORF, "Protein component of the small (40S) ribosomal subunit, has apurinic/apyrimidinic (AP) endonuclease activity; essential for viability; has similarity to E. coli S3 and rat S3 ribosomal proteins"	2	3.02139	3.81419	4.15538	15.1553	23.735	12.1283	9.69349	15.3812	12.9157
YOR089C	VPS21 SGDID:S000005615, Chr XV from 490828-490196, Genome Release 64-1-1, reverse complement, Verified ORF, "Rab family GTPase required for endocytic transport and for sorting of vacuolar hydrolases; localized in endocytic intermediates; detected in mitochondria; geranylgeranylation required for membrane association; mammalian Rab5 homolog"	2	15.1087	18.267	21.547	8.70537	5.58102	5.22739	3.9797	7.31592	2.52026
YOR099W	KTR1 SGDID:S000005625, Chr XV from 511825-513006, Genome Release 64-1-1, Verified ORF, "Alpha-1,2-mannosyltransferase involved in O- and N-linked protein glycosylation; type II membrane protein; member of the KRE2/MNT1 mannosyltransferase family"	2	17.2672	18.3202	24.852	7.6468	8.32751	5.27664	5.2868	5.15871	4.46531
YOR193W	PEX27 SGDID:S000005719, Chr XV from 710446-711576, Genome Release 64-1-1, Verified ORF, "Peripheral peroxisomal membrane protein involved in controlling peroxisome size and number, interacts with homologous protein Pex25p"	2	2.50024	1.92464	2.56114	21.2873	10.6558	16.0822	10.3753	15.5602	12.4025
YPL154C	PEP4 SGDID:S000006075, Chr XVI from 260931-259714, Genome Release 64-1-1, reverse complement, Verified ORF, "Vacuolar aspartyl protease (proteinase A), required for the posttranslational precursor maturation of vacuolar proteinases; important for protein turnover after oxidative damage; synthesized as a zymogen, self-activates"	2	15.071	16.985	23.9216	9.29719	6.59434	6.0461	6.24337	9.67194	6.16947
YPL232W	SSO1 SGDID:S000006153, Chr XVI from 107275-108147, Genome Release 64-1-1, Verified ORF, "Plasma membrane t-SNARE involved in fusion of secretory vesicles at the plasma membrane and in vesicle fusion during sporulation; forms a complex with Sec9p that binds v-SNARE Snc2p; syntaxin homolog; functionally redundant with Sso2p"	2	17.8019	12.489	20.9874	9.14736	8.90739	6.89452	6.83394	8.34584	8.59272
YAL030W	SNC1 SGDID:S000000028, Chr I from 87286-87387,87501-87752, Genome Release 64-1-1, Verified ORF, "Vesicle membrane receptor protein (v-SNARE) involved in the fusion between Golgi-derived secretory vesicles with the plasma membrane; proposed to be involved in endocytosis; member of the synaptobrevin/VAMP family of R-type v-SNARE proteins"	1	17.7943	15.7645	22.0828	10.8586	9.82945	9.23471	5.39173	6.15659	2.88728
YAR027W	UIP3 SGDID:S000000075, Chr I from 183770-184477, Genome Release 64-1-1, Verified ORF, "Putative integral membrane protein of unknown function; interacts with Ulp1p at the nuclear periphery; member of DUP240 gene family"	1	18.7622	17.3697	23.4359	8.22651	5.91403	4.92565	6.37799	7.09656	7.89138
YBL002W	HTB2 SGDID:S000000098, Chr II from 236492-236887, Genome Release 64-1-1, Verified ORF, "Histone H2B, core histone protein required for chromatin assembly and chromosome function; nearly identical to HTB1; Rad6p-Bre1p-Lge1p mediated ubiquitination regulates transcriptional activation, meiotic DSB formation and H3 methylation"	1	3.54175	2.69578	3.17251	3.05147	3.83776	3.48993	4.00915	2.38428	3.08919
YBL050W	SEC17 SGDID:S000000146, Chr II from 125125-125154,125271-126119, Genome Release 64-1-1, Verified ORF, "Peripheral membrane protein required for vesicular transport between ER and Golgi, the 'priming' step in homotypic vacuole fusion, and autophagy; stimulates the ATPase activity of Sec18p; has similarity to mammalian alpha-SNAP"	1	17.0409	15.1957	31.7939	6.54331	6.34865	3.80113	4.73072	7.00265	7.54296
YBR009C	HHF1 SGDID:S000000213, Chr II from 255684-255373, Genome Release 64-1-1, reverse complement, Verified ORF, "Histone H4, core histone protein required for chromatin assembly and chromosome function; one of two identical histone proteins (see also HHF2); contributes to telomeric silencing; N-terminal domain involved in maintaining genomic integrity"	1	6.59379	4.92745	5.82002	6.14883	6.98587	5.90018	9.53699	4.3797	10.7369
YBR010W	HHT1 SGDID:S000000214, Chr II from 256331-256741, Genome Release 64-1-1, Verified ORF, "Histone H3, core histone protein required for chromatin assembly, part of heterochromatin-mediated telomeric and HM silencing; one of two identical histone H3 proteins (see HHT2); regulated by acetylation, methylation, and phosphorylation"	1	3.57648	2.51302	3.55072	2.96166	3.4607	3.19026	4.91174	2.43081	4.53433
YBR069C	TAT1 SGDID:S000000273, Chr II from 378433-376574, Genome Release 64-1-1, reverse complement, Verified ORF, "Amino acid transport protein for valine, leucine, isoleucine, and tyrosine, low-affinity tryptophan and histidine transporter; overexpression confers FK506 and FTY720 resistance"	1	17.8392	13.3386	20.0793	10.3244	7.38222	6.57071	6.45627	9.55913	8.45011
YBR072W	HSP26 SGDID:S000000276, Chr II from 382030-382674, Genome Release 64-1-1, Verified ORF, "Small heat shock protein (sHSP) with chaperone activity; forms hollow, sphere-shaped oligomers that suppress unfolded proteins aggregation; oligomer activation requires heat-induced conformational change; also has mRNA binding activity"	1	2.67206	2.3945	3.31584	17.8778	15.031	18.7086	8.21203	14.8612	16.927
YBR106W	PHO88 SGDID:S000000310, Chr II from 452658-453224, Genome Release 64-1-1, Verified ORF, "Probable membrane protein, involved in phosphate transport; pho88 pho86 double null mutant exhibits enhanced synthesis of repressible acid phosphatase at high inorganic phosphate concentrations"	1	3.71887	2.66555	2.97365	15.7731	14.0959	10.9063	12.0552	22.147	15.6643
YBR127C	VMA2 SGDID:S000000331, Chr II from 492822-491269, Genome Release 64-1-1, reverse complement, Verified ORF, "Subunit B of the eight-subunit V1 peripheral membrane domain of the vacuolar H+-ATPase (V-ATPase), an electrogenic proton pump found throughout the endomembrane system; contains nucleotide binding sites; also detected in the cytoplasm"	1	24.2732	10.6363	27.1454	6.85231	7.79162	5.26223	5.40411	7.48155	5.1532
YBR139W	YBR139W SGDID:S000000343, Chr II from 515664-517190, Genome Release 64-1-1, Verified ORF, "Putative serine type carboxypeptidase with a role in phytochelatin synthesis; green fluorescent protein (GFP)-fusion protein localizes to the vacuole; expression induced by nitrogen limitation in a GLN3, GAT1-independent manner"	1	21.0834	18.1019	28.7009	7.25471	5.62121	4.60055	5.07489	5.15452	4.40794
YBR196C	PGI1 SGDID:S000000400, Chr II from 613900-612236, Genome Release 64-1-1, reverse complement, Verified ORF, "Glycolytic enzyme phosphoglucose isomerase, catalyzes the interconversion of glucose-6-phosphate and fructose-6-phosphate; required for cell cycle progression and completion of the gluconeogenic events of sporulation"	1	5.50096	7.35416	9.89305	15.0527	15.7622	12.8266	9.59234	14.2653	9.75272
YCR011C	ADP1 SGDID:S000000604, Chr III from 136873-133724, Genome Release 64-1-1, reverse complement, Verified ORF, "Putative ATP-dependent permease of the ABC transporter family of proteins"	1	13.2793	14.6761	23.0328	7.20083	10.471	10.1913	8.97932	8.45144	3.71786
YCR031C	RPS14A SGDID:S000000627, Chr III from 177906-177500,178220-178214, Genome Release 64-1-1, reverse complement, Verified ORF, "Ribosomal protein 59 of the small subunit, required for ribosome assembly and 20S pre-rRNA processing; mutations confer cryptopleurine resistance; nearly identical to Rps14Bp and similar to E. coli S11 and rat S14 ribosomal proteins"	1	1.23971	1.50269	2.84805	18.0663	29.4724	13.493	11.6156	12.5392	9.22315
YDR050C	TPI1 SGDID:S000002457, Chr IV from 556472-555726, Genome Release 64-1-1, reverse complement, Verified ORF, "Triose phosphate isomerase, abundant glycolytic enzyme; mRNA half-life is regulated by iron availability; transcription is controlled by activators Reb1p, Gcr1p, and Rap1p through binding sites in the 5' non-coding region"	1	4.74814	9.54935	13.9341	13.2049	24.2632	7.34679	7.71861	10.1551	9.0798
YDR093W	DNF2 SGDID:S000002500, Chr IV from 631282-636120, Genome Release 64-1-1, Verified ORF, "Aminophospholipid translocase (flippase) that localizes primarily to the plasma membrane; contributes to endocytosis, protein transport and cell polarity; type 4 P-type ATPase"	1	14.6625	13.2444	26.1754	8.2842	8.41303	6.38815	4.54724	6.28449	1.46304
YDR233C	RTN1 SGDID:S000002641, Chr IV from 930357-929470, Genome Release 64-1-1, reverse complement, Verified ORF, "ER membrane protein that interacts with Sey1p to maintain ER morphology; interacts with exocyst subunit Sec6p, with Yip3p, and with Sbh1p; null mutant has an altered ER morphology; member of the RTNLA (reticulon-like A) subfamily"	1	0.856525	2.35559	0.953859	15.8826	13.4277	15.3735	11.8632	23.8906	15.3964
YDR384C	ATO3 SGDID:S000002792, Chr IV from 1242031-1241204, Genome Release 64-1-1, reverse complement, Verified ORF, "Plasma membrane protein, regulation pattern suggests a possible role in export of ammonia from the cell; phosphorylated in mitochondria; member of the TC 9.B.33 YaaH family of putative transporters"	1	16.652	12.3647	23.9017	9.84509	6.1371	4.25591	8.43512	8.88968	9.51871
YEL065W	SIT1 SGDID:S000000791, Chr V from 27657-29543, Genome Release 64-1-1, Verified ORF, "Ferrioxamine B transporter, member of the ARN family of transporters that specifically recognize siderophore-iron chelates; transcription is induced during iron deprivation and diauxic shift; potentially phosphorylated by Cdc28p"	1	15.1725	13.8715	18.5956	10.5	7.38734	7.97654	9.48055	9.42057	7.59536
YER145C	FTR1 SGDID:S000000947, Chr V from 461740-460526, Genome Release 64-1-1, reverse complement, Verified ORF, "High affinity iron permease involved in the transport of iron across the plasma membrane; forms complex with Fet3p; expression is regulated by iron"	1	10.3242	9.12855	14.0527	4.80007	6.1786	5.34028	6.63806	6.26188	10.1628
YFL027C	GYP8 SGDID:S000001867, Chr VI from 81912-80419, Genome Release 64-1-1, reverse complement, Verified ORF, "GTPase-activating protein for yeast Rab family members; Ypt1p is the preferred in vitro substrate but also acts on Sec4p, Ypt31p and Ypt32p; involved in the regulation of ER to Golgi vesicle transport"	1	0	0	0	26.3814	15.2859	22.7489	13.1367	13.2318	9.21525
YFR031C-A	RPL2A SGDID:S000002104, Chr VI from 221267-220507,221418-221415, Genome Release 64-1-1, reverse complement, Verified ORF, "Protein component of the large (60S) ribosomal subunit, identical to Rpl2Bp and has similarity to E. coli L2 and rat L8 ribosomal proteins"	1	7.07398	3.37232	9.04836	9.23932	46.1454	8.98785	4.71294	6.11288	5.30691
YGL008C	PMA1 SGDID:S000002976, Chr VII from 482666-479910, Genome Release 64-1-1, reverse complement, Verified ORF, "Plasma membrane H+-ATPase, pumps protons out of the cell; major regulator of cytoplasmic pH and plasma membrane potential; P2-type ATPase; Hsp30p plays a role in Pma1p regulation; interactions with Std1p appear to propagate [GAR+]"	1	8.51835	6.81099	8.20136	14.8951	17.2949	12.4599	10.3495	14.2692	7.2008
YGL123W	RPS2 SGDID:S000003091, Chr VII from 277617-278381, Genome Release 64-1-1, Verified ORF, "Protein component of the small (40S) subunit, essential for control of translational accuracy; phosphorylation by C-terminal domain kinase I (CTDK-I) enhances translational accuracy; methylated on one or more arginine residues by Hmt1p"	1	3.80068	2.65948	3.13253	10.7638	23.6197	9.87459	7.46161	9.16382	7.79643
YGL186C	TPN1 SGDID:S000003154, Chr VII from 152776-151037, Genome Release 64-1-1, reverse complement, Verified ORF, "Plasma membrane pyridoxine (vitamin B6) transporter; member of the purine-cytosine permease subfamily within the major facilitator superfamily; proton symporter with similarity to Fcy21p, Fcy2p, and Fcy22p"	1	14.1763	13.8991	23.8304	8.64323	7.6736	5.97185	6.0432	6.74234	5.9424
YGL203C	KEX1 SGDID:S000003171, Chr VII from 114664-112475, Genome Release 64-1-1, reverse complement, Verified ORF, "Protease involved in the processing of killer toxin and alpha factor precursor; cleaves Lys and Arg residues from the C-terminus of peptides and proteins"	1	18.2465	13.9428	30.0463	10.8263	8.33403	7.09534	4.59929	4.77346	2.13602
YGR027C	RPS25A SGDID:S000003259, Chr VII from 534458-534132, Genome Release 64-1-1, reverse complement, Verified ORF, "Protein component of the small (40S) ribosomal subunit; nearly identical to Rps25Bp and has similarity to rat S25 ribosomal protein"	1	3.10999	3.24972	3.11184	17.0427	26.6586	12.902	8.9421	11.9787	13.0044
YGR034W	RPL26B SGDID:S000003266, Chr VII from 555812-555830,556308-556672, Genome Release 64-1-1, Verified ORF, "Protein component of the large (60S) ribosomal subunit, nearly identical to Rpl26Ap and has similarity to E. coli L24 and rat L26 ribosomal proteins; binds to 5.8S rRNA"	1	3.88131	2.18507	5.15013	11.2271	46.541	11.8435	6.23179	6.81002	6.13014
YGR055W	MUP1 SGDID:S000003287, Chr VII from 599417-601141, Genome Release 64-1-1, Verified ORF, "High affinity methionine permease, integral membrane protein with 13 putative membrane-spanning regions; also involved in cysteine uptake"	1	15.5574	16.1915	20.357	6.21747	6.15306	4.59137	5.69402	7.43566	4.51078
YGR106C	VOA1 SGDID:S000003338, Chr VII from 699786-698989, Genome Release 64-1-1, reverse complement, Verified ORF, "Endoplasmic reticulum protein that functions, together with other assembly factors, in assembly of the V0 sector of the vacuolar ATPase (V-ATPase); null mutation enhances the V-ATPase deficiency of a vma21 mutant impaired in ER retrieval"	1	18.765	22.7464	19.9672	9.02096	5.67166	3.55135	4.15301	8.37311	1.69156
YGR132C	PHB1 SGDID:S000003364, Chr VII from 756452-755589, Genome Release 64-1-1, reverse complement, Verified ORF, "Subunit of the prohibitin complex (Phb1p-Phb2p), a 1.2 MDa ring-shaped inner mitochondrial membrane chaperone that stabilizes newly synthesized proteins; determinant of replicative life span; involved in mitochondrial segregation"	1	10.822	6.21982	12.8333	9.00984	12.4926	12.2794	11.0384	10.4029	14.9018
YGR263C	SAY1 SGDID:S000003495, Chr VII from 1019241-1017967, Genome Release 64-1-1, reverse complement, Verified ORF, "Sterol deacetylase; component of the sterol acetylation/deacetylation cycle along with Atf2p; integral membrane protein with active site in the ER lumen; green fluorescent protein (GFP)-fusion protein localizes to the endoplasmic reticulum"	1	13.6551	18.9751	13.4355	4.29264	8.45539	6.88784	4.24682	9.17351	20.8781
YGR295C	COS6 SGDID:S000003527, Chr VII from 1082729-1081584, Genome Release 64-1-1, reverse complement, Verified ORF, "Protein of unknown function, member of the DUP380 subfamily of conserved, often subtelomerically-encoded proteins"	1	19.1686	21.6828	22.7585	8.85089	4.78524	5.65268	5.98591	7.46931	3.64602
YHR021C	RPS27B SGDID:S000001063, Chr VIII from 148116-147871,148669-148667, Genome Release 64-1-1, reverse complement, Verified ORF, "Protein component of the small (40S) ribosomal subunit; nearly identical to Rps27Ap and has similarity to rat S27 ribosomal protein"	1	6.29213	3.54071	4.91698	11.2995	26.7877	8.73862	8.12355	14.9688	15.332
YHR028C	DAP2 SGDID:S000001070, Chr VIII from 167434-164978, Genome Release 64-1-1, reverse complement, Verified ORF, "Dipeptidyl aminopeptidase, synthesized as a glycosylated precursor; localizes to the vacuolar membrane; similar to Ste13p"	1	13.3485	9.70042	20.7052	5.87009	9.44703	6.88452	20.298	8.73442	5.01181
YHR174W	ENO2 SGDID:S000001217, Chr VIII from 451327-452640, Genome Release 64-1-1, Verified ORF, "Enolase II, a phosphopyruvate hydratase that catalyzes the conversion of 2-phosphoglycerate to phosphoenolpyruvate during glycolysis and the reverse reaction during gluconeogenesis; expression is induced in response to glucose"	1	7.5549	4.76645	4.11465	21.4629	10.451	4.81155	10.2959	17.8627	18.6799
YHR203C	RPS4B SGDID:S000001246, Chr VIII from 505247-504476,505530-505517, Genome Release 64-1-1, reverse complement, Verified ORF, "Protein component of the small (40S) ribosomal subunit; identical to Rps4Ap and has similarity to rat S4 ribosomal protein"	1	6.26243	6.60947	5.89864	10.7268	31.5499	11.9484	7.94809	12.5948	6.46146
YIL048W	NEO1 SGDID:S000001310, Chr IX from 261437-264892, Genome Release 64-1-1, Verified ORF, "Putative aminophospholipid translocase (flippase) involved in endocytosis and vacuolar biogenesis; localizes to endosomes and the Golgi aparatus"	1	19.6628	13.7965	22.3024	7.31807	10.5476	8.1283	6.22814	6.47675	5.53943
YIL124W	AYR1 SGDID:S000001386, Chr IX from 126204-127097, Genome Release 64-1-1, Verified ORF, "NADPH-dependent 1-acyl dihydroxyacetone phosphate reductase found in lipid particles, ER, and mitochondrial outer membrane; involved in phosphatidic acid biosynthesis; required for spore germination; capable of metabolizing steroid hormones"	1	0.55434	0.969203	0.848212	23.5189	15.6172	20.4318	11.394	19.282	7.38439
YIL173W	VTH1 SGDID:S000001435, Chr IX from 11492-16141, Genome Release 64-1-1, Verified ORF, "Putative membrane glycoprotein with strong similarity to Vth2p and Pep1p/Vps10p, may be involved in vacuolar protein sorting"	1	20.3892	14.7281	31.9651	4.90274	8.59142	4.71705	4.63922	5.63513	3.38647
YJL082W	IML2 SGDID:S000003618, Chr X from 281185-283380, Genome Release 64-1-1, Verified ORF, "Protein of unknown function; the authentic, non-tagged protein is detected in highly purified mitochondria in high-throughput studies"	1	0.540618	0	0	22.5268	14.9634	16.8407	13.3231	18.8811	12.9243
YJL138C	TIF2 SGDID:S000003674, Chr X from 154691-153504, Genome Release 64-1-1, reverse complement, Verified ORF, "Translation initiation factor eIF4A, identical to Tif1p; DEA(D/H)-box RNA helicase that couples ATPase activity to RNA binding and unwinding; forms a dumbbell structure of two compact domains connected by a linker; interacts with eIF4G"	1	4.67042	7.88194	13.1724	9.96464	22.6414	11.3409	6.99158	11.5281	11.8087
YJL178C	ATG27 SGDID:S000003714, Chr X from 90097-89282, Genome Release 64-1-1, reverse complement, Verified ORF, "Type I membrane protein involved in autophagy and the cytoplasm-to-vacuole targeting (Cvt) pathway; may be involved in membrane delivery to the phagophore assembly site"	1	19.3855	19.7207	23.0597	7.86936	8.47736	4.86678	5.26063	5.64678	5.71318
YJL198W	PHO90 SGDID:S000003734, Chr X from 60844-63489, Genome Release 64-1-1, Verified ORF, "Low-affinity phosphate transporter; deletion of pho84, pho87, pho89, pho90, and pho91 causes synthetic lethality; transcription independent of Pi and Pho4p activity; overexpression results in vigorous growth"	1	13.8759	15.4701	19.8083	11.0878	7.59821	5.62291	9.56918	10.2765	6.69114
YJR009C	TDH2 SGDID:S000003769, Chr X from 454681-453683, Genome Release 64-1-1, reverse complement, Verified ORF, "Glyceraldehyde-3-phosphate dehydrogenase, isozyme 2, involved in glycolysis and gluconeogenesis; tetramer that catalyzes the reaction of glyceraldehyde-3-phosphate to 1,3 bis-phosphoglycerate; detected in the cytoplasm and cell wall"	1	7.67075	6.78497	10.0232	13.6402	15.6995	11.444	9.63603	12.4853	12.6161
YJR045C	SSC1 SGDID:S000003806, Chr X from 521602-519638, Genome Release 64-1-1, reverse complement, Verified ORF, "Hsp70 family ATPase, constituent of the import motor component of the Translocase of the Inner Mitochondrial membrane (TIM23 complex); involved in protein translocation and folding; subunit of SceI endonuclease"	1	6.19377	6.42029	12.3178	12.8482	14.6787	11.317	10.2219	15.1653	10.8371
YJR077C	MIR1 SGDID:S000003838, Chr X from 578190-577255, Genome Release 64-1-1, reverse complement, Verified ORF, "Mitochondrial phosphate carrier, imports inorganic phosphate into mitochondria; functionally redundant with Pic2p but more abundant than Pic2p under normal conditions; phosphorylated"	1	3.07325	2.50779	10.0527	13.8699	16.428	17.7489	11.3854	15.1183	9.81575
YJR123W	RPS5 SGDID:S000003884, Chr X from 651901-652578, Genome Release 64-1-1, Verified ORF, "Protein component of the small (40S) ribosomal subunit, the least basic of the non-acidic ribosomal proteins; phosphorylated in vivo; essential for viability; has similarity to E. coli S7 and rat S5 ribosomal proteins"	1	2.74886	2.60321	3.50084	11.4469	30.9473	13.4014	9.86851	11.4707	14.0123
YJR144W	MGM101 SGDID:S000003905, Chr X from 700882-701691, Genome Release 64-1-1, Verified ORF, "Protein involved in mitochondrial genome maintenance; component of the mitochondrial nucleoid, required for the repair of oxidative mtDNA damage"	1	40.4744	16.3178	37.6553	1.12173	1.09825	0.364539	2.18681	0.12894	0.652167
YKL002W	DID4 SGDID:S000001485, Chr XI from 437778-437837,437906-438544, Genome Release 64-1-1, Verified ORF, "Class E Vps protein of the ESCRT-III complex, required for sorting of integral membrane proteins into lumenal vesicles of multivesicular bodies, and for delivery of newly synthesized vacuolar enzymes to the vacuole, involved in endocytosis"	1	16.3441	19.4142	25.3869	8.23666	6.67081	5.18679	6.94872	6.49965	2.96276
YKL039W	PTM1 SGDID:S000001522, Chr XI from 362622-364193, Genome Release 64-1-1, Verified ORF, "Protein of unknown function, copurifies with late Golgi vesicles containing the v-SNARE Tlg2p"	1	23.0949	14.973	22.2623	8.60534	8.19539	4.83638	6.21437	5.55812	6.26022
YKL060C	FBA1 SGDID:S000001543, Chr XI from 327487-326408, Genome Release 64-1-1, reverse complement, Verified ORF, "Fructose 1,6-bisphosphate aldolase, required for glycolysis and gluconeogenesis; catalyzes conversion of fructose 1,6 bisphosphate to glyceraldehyde-3-P and dihydroxyacetone-P; locates to mitochondrial outer surface upon oxidative stress"	1	5.51574	6.26486	8.47135	11.0591	18.356	7.14632	7.79818	13.1756	10.568
YKL152C	GPM1 SGDID:S000001635, Chr XI from 164385-163642, Genome Release 64-1-1, reverse complement, Verified ORF, "Tetrameric phosphoglycerate mutase, mediates the conversion of 3-phosphoglycerate to 2-phosphoglycerate during glycolysis and the reverse reaction during gluconeogenesis"	1	4.35954	6.83451	8.92492	12.8535	29.9318	8.39258	8.36536	9.66653	10.6712
YKL196C	YKT6 SGDID:S000001679, Chr XI from 75534-74932, Genome Release 64-1-1, reverse complement, Verified ORF, "Vesicle membrane protein (v-SNARE) with acyltransferase activity; involved in trafficking to and within the Golgi, endocytic trafficking to the vacuole, and vacuolar fusion; membrane localization due to prenylation at the carboxy-terminus"	1	6.73412	5.17305	12.1064	6.7008	3.50505	5.15484	4.17667	4.88038	4.54682
YLR025W	SNF7 SGDID:S000004015, Chr XII from 194452-195174, Genome Release 64-1-1, Verified ORF, "One of four subunits of the endosomal sorting complex required for transport III (ESCRT-III); involved in the sorting of transmembrane proteins into the multivesicular body (MVB) pathway; recruited from the cytoplasm to endosomal membranes"	1	18.2057	18.4009	31.5972	7.54483	7.80939	1.18789	6.36445	5.41408	3.47553
YLR237W	THI7 SGDID:S000004227, Chr XII from 612367-614163, Genome Release 64-1-1, Verified ORF, "Plasma membrane transporter responsible for the uptake of thiamine, member of the major facilitator superfamily of transporters; mutation of human ortholog causes thiamine-responsive megaloblastic anemia"	1	10.129	18.0522	24.1554	10.957	7.40363	5.20554	7.17981	9.47969	7.43778
YLR259C	HSP60 SGDID:S000004249, Chr XII from 665002-663284, Genome Release 64-1-1, reverse complement, Verified ORF, "Tetradecameric mitochondrial chaperonin required for ATP-dependent folding of precursor polypeptides and complex assembly; prevents aggregation and mediates protein refolding after heat shock; role in mtDNA transmission; phosphorylated"	1	1.00401	1.02115	3.20335	22.7075	14.4037	13.03	13.2166	11.9538	19.46
YLR286C	CTS1 SGDID:S000004276, Chr XII from 710136-708448, Genome Release 64-1-1, reverse complement, Verified ORF, "Endochitinase, required for cell separation after mitosis; transcriptional activation during the G1 phase of the cell cycle is mediated by transcription factor Ace2p"	1	17.0723	18.6426	30.7919	7.47211	4.73982	7.26039	4.41751	5.31266	4.29065
YLR325C	RPL38 SGDID:S000004317, Chr XII from 781379-781143, Genome Release 64-1-1, reverse complement, Verified ORF, "Protein component of the large (60S) ribosomal subunit, has similarity to rat L38 ribosomal protein"	1	7.15232	6.27945	8.52238	12.8002	19.3637	13.2374	9.64362	11.2186	11.7823
YLR354C	TAL1 SGDID:S000004346, Chr XII from 837357-836350, Genome Release 64-1-1, reverse complement, Verified ORF, "Transaldolase, enzyme in the non-oxidative pentose phosphate pathway; converts sedoheptulose 7-phosphate and glyceraldehyde 3-phosphate to erythrose 4-phosphate and fructose 6-phosphate"	1	5.63182	7.63818	10.2552	13.0037	22.506	10.4157	7.75496	12.348	10.4464
YLR413W	YLR413W SGDID:S000004405, Chr XII from 951156-953183, Genome Release 64-1-1, Uncharacterized ORF, "Putative protein of unknown function; YLR413W is not an essential gene"	1	12.9717	14.9906	22.5203	10.9253	7.50299	7.69599	8.36499	10.6278	4.4003
YLR447C	VMA6 SGDID:S000004439, Chr XII from 1027893-1026856, Genome Release 64-1-1, reverse complement, Verified ORF, "Subunit d of the five-subunit V0 integral membrane domain of vacuolar H+-ATPase (V-ATPase), an electrogenic proton pump found in the endomembrane system; stabilizes VO subunits; required for V1 domain assembly on the vacuolar membrane"	1	20.9863	13.4323	24.3539	8.47345	8.41025	3.76396	6.56108	5.9847	8.03414
YML086C	ALO1 SGDID:S000004551, Chr XIII from 97371-95791, Genome Release 64-1-1, reverse complement, Verified ORF, "D-Arabinono-1,4-lactone oxidase, catalyzes the final step in biosynthesis of dehydro-D-arabinono-1,4-lactone, which is protective against oxidative stress"	1	2.54693	1.95451	3.30752	17.6181	12.7534	12.772	13.7976	18.3342	16.9158
YMR058W	FET3 SGDID:S000004662, Chr XIII from 388822-390732, Genome Release 64-1-1, Verified ORF, "Ferro-O2-oxidoreductase required for high-affinity iron uptake and involved in mediating resistance to copper ion toxicity, belongs to class of integral membrane multicopper oxidases"	1	19.9702	17.1719	29.4978	4.76647	6.32199	4.50922	3.81093	6.19397	7.75759
YMR083W	ADH3 SGDID:S000004688, Chr XIII from 434788-435915, Genome Release 64-1-1, Verified ORF, "Mitochondrial alcohol dehydrogenase isozyme III; involved in the shuttling of mitochondrial NADH to the cytosol under anaerobic conditions and ethanol production"	1	4.78352	6.95284	8.61477	15.2632	21.042	12.5208	8.75242	12.5469	9.52343
YMR297W	PRC1 SGDID:S000004912, Chr XIII from 861922-863520, Genome Release 64-1-1, Verified ORF, "Vacuolar carboxypeptidase Y (proteinase C; CPY), broad-specificity C-terminal exopeptidase involved in non-specific protein degradation in the vacuole; member of the serine carboxypeptidase family"	1	19.8942	19.4115	30.2361	9.75092	4.09741	3.96235	5.27799	6.17019	1.19937
YNL064C	YDJ1 SGDID:S000005008, Chr XIV from 507097-505868, Genome Release 64-1-1, reverse complement, Verified ORF, "Type I HSP40 co-chaperone involved in regulation of the HSP90 and HSP70 functions; involved in protein translocation across membranes; member of the DnaJ family"	1	1.8748	1.20454	2.6186	16.6031	15.154	15.4354	12.7505	16.1108	18.2483
YNL071W	LAT1 SGDID:S000005015, Chr XIV from 491523-492971, Genome Release 64-1-1, Verified ORF, "Dihydrolipoamide acetyltransferase component (E2) of pyruvate dehydrogenase complex, which catalyzes the oxidative decarboxylation of pyruvate to acetyl-CoA"	1	6.37659	4.0772	11.3827	12.9818	13.1687	14.977	12.1853	13.3585	10.3864
YNL268W	LYP1 SGDID:S000005212, Chr XIV from 138550-140385, Genome Release 64-1-1, Verified ORF, "Lysine permease; one of three amino acid permeases (Alp1p, Can1p, Lyp1p) responsible for uptake of cationic amino acids"	1	13.6986	12.3816	19.309	6.92038	7.35756	5.82755	6.12404	7.39792	4.32019
YOL012C	HTZ1 SGDID:S000005372, Chr XV from 303983-303579, Genome Release 64-1-1, reverse complement, Verified ORF, "Histone variant H2AZ, exchanged for histone H2A in nucleosomes by the SWR1 complex; involved in transcriptional regulation through prevention of the spread of silent heterochromatin"	1	8.27497	7.31494	10.3863	9.79235	7.35433	11.1034	11.115	7.43287	9.10588
YOL018C	TLG2 SGDID:S000005378, Chr XV from 292074-290881, Genome Release 64-1-1, reverse complement, Verified ORF, "Syntaxin-like t-SNARE that forms a complex with Tlg1p and Vti1p and mediates fusion of endosome-derived vesicles with the late Golgi; binds Vps45p, which prevents Tlg2p degradation and also facilitates t-SNARE complex formation; homologous to mammalian SNARE protein syntaxin 16 (Sx16)"	1	18.6111	15.8732	21.8535	8.78669	7.54802	8.74411	6.47814	7.2868	4.8185
YOR036W	PEP12 SGDID:S000005562, Chr XV from 400348-401214, Genome Release 64-1-1, Verified ORF, "Target membrane receptor (t-SNARE) for vesicular intermediates traveling between the Golgi apparatus and the vacuole; controls entry of biosynthetic, endocytic, and retrograde traffic into the prevacuolar compartment; syntaxin"	1	16.7735	23.3624	25.9906	7.09829	5.85536	7.56669	3.42833	8.71585	1.20909
YOR063W	RPL3 SGDID:S000005589, Chr XV from 444686-445849, Genome Release 64-1-1, Verified ORF, "Protein component of the large (60S) ribosomal subunit, has similarity to E. coli L3 and rat L3 ribosomal proteins; involved in the replication and maintenance of killer double stranded RNA virus"	1	1.5961	2.60905	1.31154	15.1933	40.2223	15.254	5.54039	11.9529	6.32046
YOR208W	PTP2 SGDID:S000005734, Chr XV from 733925-736177, Genome Release 64-1-1, Verified ORF, "Phosphotyrosine-specific protein phosphatase involved in the inactivation of mitogen-activated protein kinase (MAPK) during osmolarity sensing; dephosporylates Hog1p MAPK and regulates its localization; localized to the nucleus"	1	5.40813	1.28113	7.13108	40.5224	15.1017	16.6684	4.79723	4.94224	4.14777
YOR369C	RPS12 SGDID:S000005896, Chr XV from 1028625-1028194, Genome Release 64-1-1, reverse complement, Verified ORF, "Protein component of the small (40S) ribosomal subunit; has similarity to rat ribosomal protein S12"	1	2.45105	2.19157	2.56636	3.22823	53.5896	4.96602	2.57267	8.62867	5.88061
YPL053C	KTR6 SGDID:S000005974, Chr XVI from 458458-457118, Genome Release 64-1-1, reverse complement, Verified ORF, "Probable mannosylphosphate transferase involved in the synthesis of core oligosaccharides in protein glycosylation pathway; member of the KRE2/MNT1 mannosyltransferase family"	1	16.7578	17.8071	25.1423	8.72184	8.20857	5.24466	5.58866	7.33451	5.19462
YPR183W	DPM1 SGDID:S000006387, Chr XVI from 900755-901558, Genome Release 64-1-1, Verified ORF, "Dolichol phosphate mannose (Dol-P-Man) synthase of the ER membrane, catalyzes the formation of Dol-P-Man from Dol-P and GDP-Man; required for glycosyl phosphatidylinositol membrane anchoring, O mannosylation, and protein glycosylation"	1	1.97235	2.19433	1.77802	17.7471	13.7488	15.9572	13.2376	17.5958	15.7688
