# Supplementary figures and images for: The peroxisomal exportomer directly inhibits phosphoactivation of the pexophagy receptor Atg36 to suppress pexophagy in yeast
Source: eLife journal article supplement (doi:10.7554/elife.74531), 2022-03-09

Figure 1-FS1A

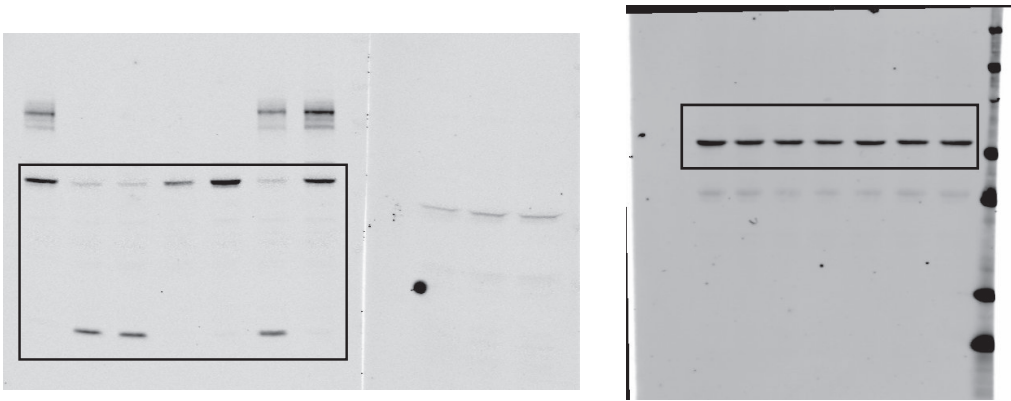

GFP

HXK

Figure 1-FS1B

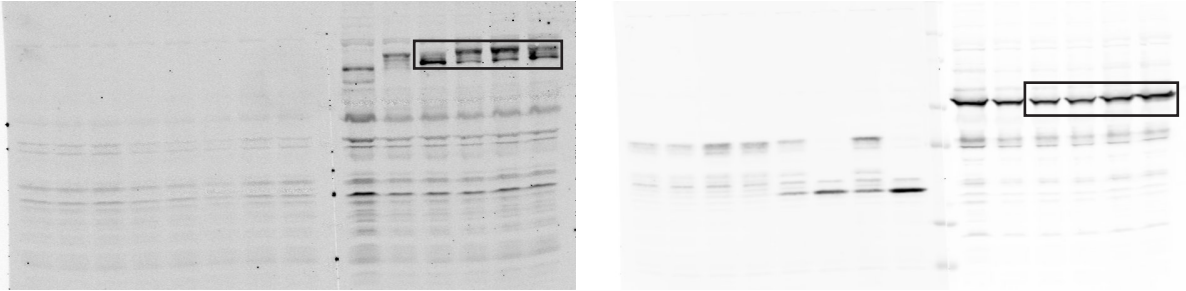

MYC

HXK

Supplement: data1 [file source data Figure 1-figure supplement 1.pdf › source data/source data Figure 1-figure supplement 1.pdf]

Figure 3-FS2A

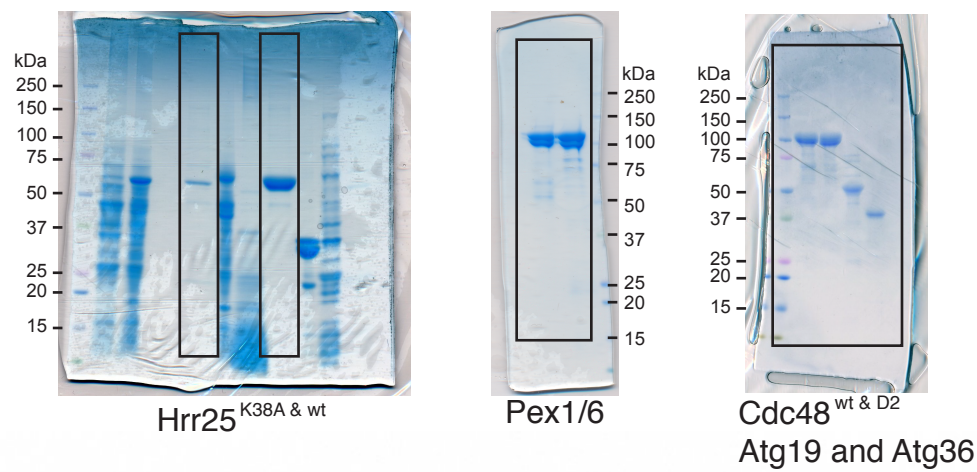

Figure 3-FS2B

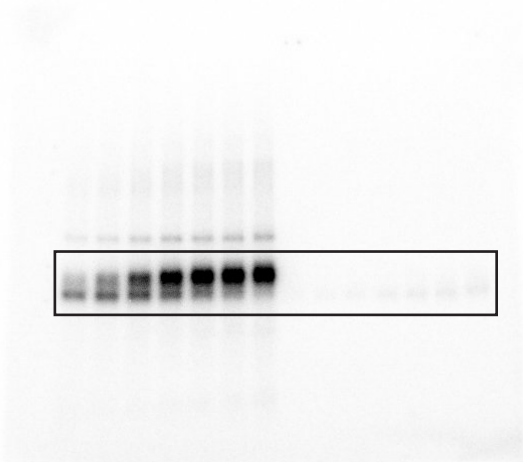

Figure 3-FS2C

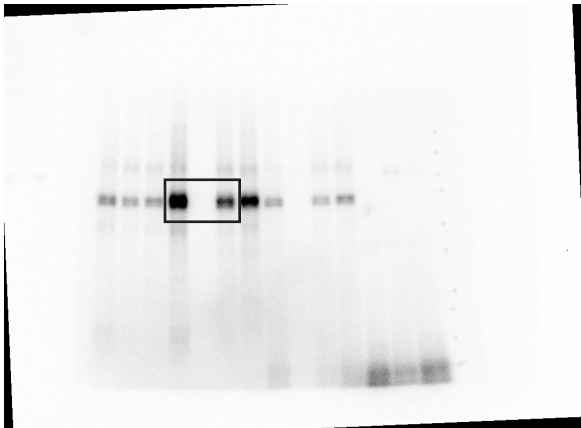

Figure 3-FS2E

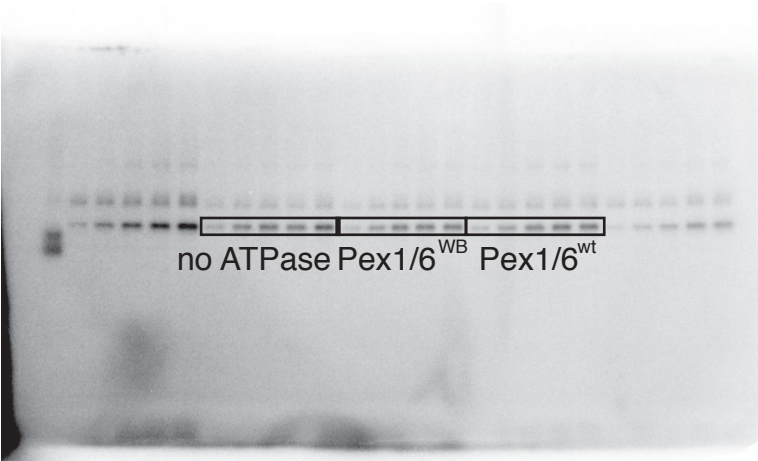

Supplement: data1 [file source data Figure 3-figure supplement 2.pdf › source data/source data Figure 3-figure supplement 2.pdf]

Figure 4-FS1D

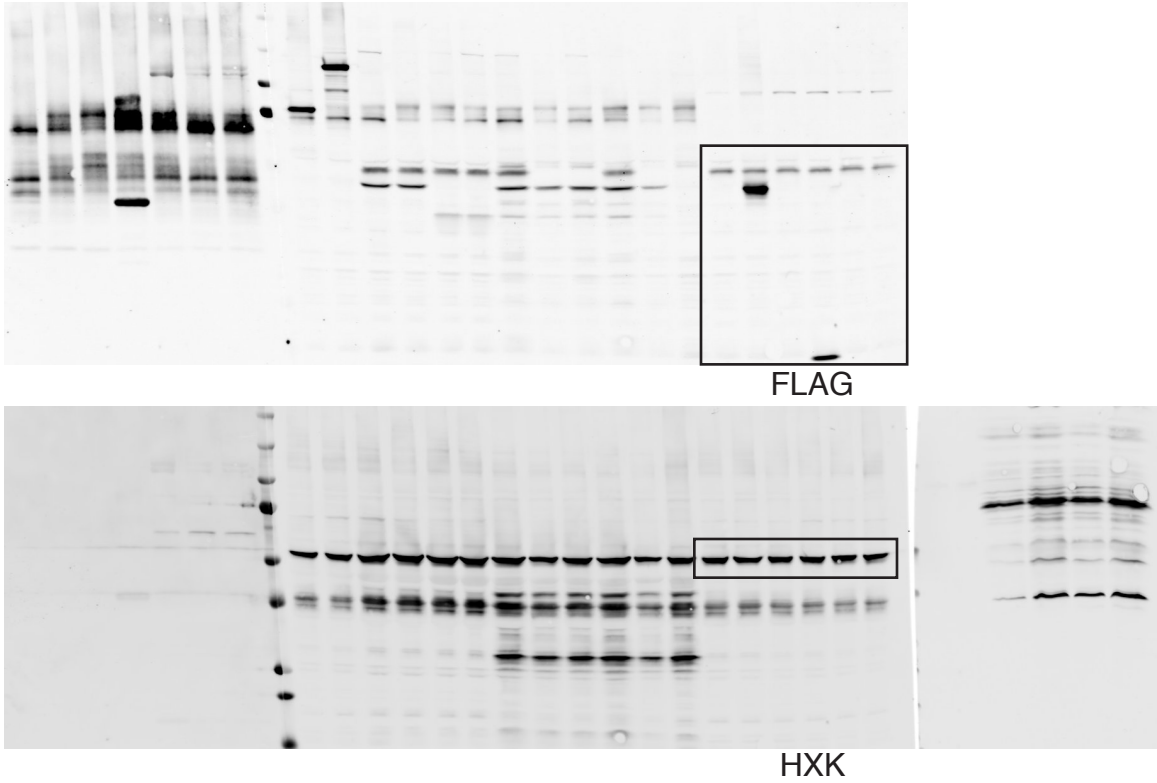

Figure 4-FS1E

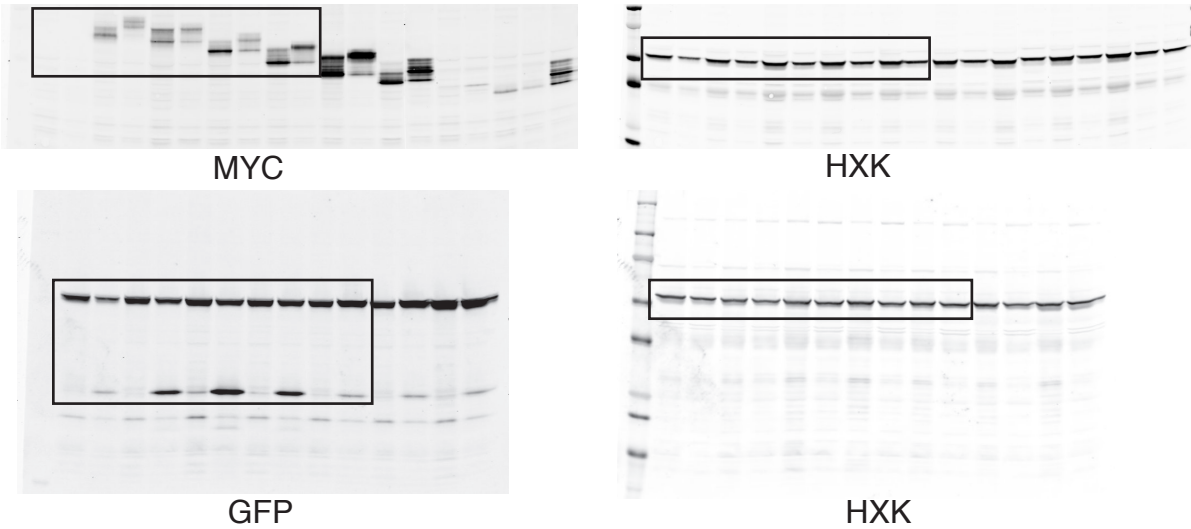

Figure 4-FS1F

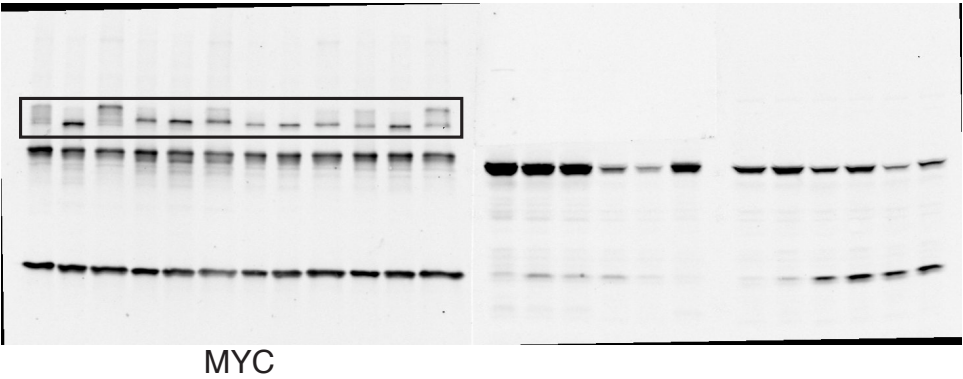

Supplement: data1 [file source data Figure 4-figure supplement 1.pdf › source data/source data Figure 4-figure supplement 1.pdf]
